# Supplementary material for: Oxygen-Tolerant Electrochemical CO₂ Capture with Doubled CO₂ Modulation per Electron
Source: Research Square preprint supplement (doi:10.21203/rs.3.rs-6873829/v1), 2025-06-26
Supplement: Supplementary file 1 [file ce2338d842be182eacd70cea.docx]

Oxygen-Tolerant Electrochemical CO₂ Capture with Doubled CO₂ Modulation per Electron

Fang-Yu Kuoa, Akachukwu D. Obib*, Glen P. Junorb*, Betar M. Gallantc*

a Department of Chemical Engineering, Massachusetts Institute of Technology, Cambridge, Massachusetts 02139, United States

b MIT Climate & Sustainability Consortium, Massachusetts Institute of Technology, Cambridge, MA 02139, United States

c Department of Mechanical Engineering, Massachusetts Institute of Technology, Cambridge, Massachusetts 02139, United States

* Corresponding author: [bgallant@mit.edu](mailto:bgallant@mit.edu), [gjunor@mit.edu](mailto:gjunor@gmail.com), [aobi@mit.edu](mailto:aobi@mit.edu)

**Table of Contents**

[1. Chemicals and Materials 3](#_Toc200291429)

[1.1. Solvent and material purification 4](#_Toc200291430)

[2. N-Heterocyclic Imine (NHI) Synthesis Procedures 5](#_Toc200291431)

[2.1. Synthesis of 2-chloroazolium salts 5](#_Toc200291432)

[2.2. Synthesis of N-heterocyclic iminium salts 7](#_Toc200291433)

[2.3. Synthesis of NHI 15](#_Toc200291434)

[2.4. Synthesis of redox-reversible NHI (6) 23](#_Toc200291435)

[3. Supplementary Methods 25](#_Toc200291436)

[3.1. Experimental details for reaction enthalpy measurements 25](#_Toc200291437)

[3.2. Sample preparation for NHI-CO2 loading determination 25](#_Toc200291438)

[3.3. Calculation of Faradaic efficiency (FE) 25](#_Toc200291439)

[4. Supplementary Figures and Tables 26](#_Toc200291440)

[5. Supplementary References 47](#_Toc200291441)

# Chemicals and Materials

| Name | Specifications | Vendor |
| --- | --- | --- |
| 1,3-Dimethyl-2-imidazolidinone (DMI) | absolute, over molecular sieve (H2O ≤0.04%), ≥99.5% (GC) | Sigma-Aldrich |
| Oxalyl chloride | reagent grade, 98% |
| Methylammonium chloride | for synthesis |
| Isopropyl amine | ≥99.5% |
| Tert-butylamine | ≥99.5% |
| triethylamine | ≥99.5% |
| 2-Hydroxybenzimidazole | 97% |
| Methyl iodide | contains copper as stabilizer, ReagentPlus®, 99% |
| Sodium hydroxide | reagent grade, ≥98%, pellets (anhydrous) |
| Tetrabutylammonium bromide | ReagentPlus®, ≥99.0% |
| Acetonitrile (MeCN) | 99%, suitable for UV/Vis spectroscopy, ReagentPlus® |
| Toluene | suitable for HPLC, 99.9% |
| Sodium hydride (NaH) | dry, 90% |
| Potassium tert-butoxide (KO*t*Bu) | reagent grade, ≥98% |
| Potassium bis(trimethylsilyl)amide (KHMDS) | 95% |
| Hexachloroethane | 99% |
| N,N’-Dimethylthiourea | 99% |
| 1,3-Diisopropyl-2-thiourea | 99% |
| Acetoin | natural, ≥95%, FG |
| 1-Hexanol | anhydrous, ≥99% |
| Potassium (K) | chunks (in mineral oil), 98% trace metals basis |
| Urea | ACS reagent, 99.0-100.5% |
| Benzoin | 98% |
| Ethylene glycol | anhydrous, 99.8% |
| Phosphorus(V) oxychloride | ReagentPlus®, 99% |
| Methanol | ≥99.8% (GC), HPLC grade, suitable for HPLC, LiChrosolv® |
| Potassium hexafluorophosphate | 99.5% trace metals basis |
| Molecular sieves, 3 Å | beads, 4-8 mesh |
| Molecular sieves, 4 Å | beads, 4-8 mesh | Sigma-Aldrich |
| Ethyl acetate (EtOAc) | HPLC Plus, for HPLC, GC, and residue analysis, 99.9% |
| Chloroform (CHCl3) | HPLC Plus, for HPLC, GC, and residue analysis, ≥99.9%, contains amylenes as stabilizer |
| Dimethyl sulfoxide-d6 | anhydrous, 99.9 atom % D |
| Acetonitrile-d3 | ≥99.8 atom % D |
| 1,4-Phenylenediamine dihydrochloride | >99.0% | TCI Chemicals |
| 1,3-Dimethyl-1H-imidazol-3-ium chloride | 97% | Ambeed |
| 1,3-Diisopropyl-1H-imidazol-3-ium chloride | 97% |
| 1,3-Di-tert-butyl-1H-imidazol-3-ium tetrafluoroborate | 97% |
| Diethyl ether (Et2O) | ≥98% (by GC) stabilised | J.T.Baker® |
| Tetrahydrofuran (THF) | Certified | Fisher Scientific |
| Hexane | Certified |
| Chloroform-D | D, 99.8% | Cambridge Isotope Laboratories |
| Methylene chloride-D₂ | D, 99.8% |
| Carbon Dioxide | CD 4.5LS-K | Linde Gas |
| 15% Carbon dioxide (balance nitrogen) | NI CD15C-K |
| Nitrogen | NI 6.0RS-T |

## Solvent and material purification

Toluene and hexanes were purified by distillation over sodium. Diethyl ether and tetrahydrofuran (THF) purified by distillation over Na/benzophenone. Acetonitrile (MeCN), acetonitrile-d3, chloroform-d were dried and stored over 3Å molecular sieves (20 w/v%). Dimethyl sulfoxide-d6 was dried and stored over 4Å molecular sieves (20 w/v%). Methylene chloride-D₂ was purified by distillation over calcium hydride (CaH2). Isopropyl amine, tert-butyl amine, and triethylamine were dried and stored over 3Å molecular sieves (20 w/v%). Methylammonium chloride was recrystallized from ethanol (EtOH, 99%) and dried in vacuo prior use.

# N-Heterocyclic Imine (NHI) Synthesis Procedures

## Synthesis of 2-chloroazolium salts

The 2-chloroazolium salts summarized in **Supplementary Fig. 1** were synthesized according to literature reported procedures, including 2-chloro-1,3-dimethyl-1H-benzimidazol-3-ium chloride (1-Cl), 2-chloro-1,3-dimethylimidazolinium chloride (2-Cl), 2-chloro-1,3-dimethyl-4,5-diphenyl-1H-imidazol-3-ium hexafluorophosphate (3-Cl), 1,3-di-tert-butyl-2-chloro-1H-imidazol-3-ium chloride (4-tBu-Cl), 2-chloro-1,3,4,5-tetramethyl-1H-imidazol-3-ium chloride (5-Cl), and 2-chloro-1,3-diisopropyl-4,5-dimethyl-1H-imidazol-3-ium chloride (5-iPr-Cl).1-4

**Supplementary Fig. 1.** Structures of 2-chloroazolium salts that are synthesized following literature procedures.

2-chloro-1,3-dimethyl-1H-imidazol-3-ium chloride (4-Cl):

Inside the glovebox, a round bottom flask was charged with 1,3-dimethyl-1H-imidazol-3-ium chloride (3.98 g, 30 mmol, 1.0 equiv.) and KHMDS (5.98 g, 30 mmol, 1.0 equiv.), and the solid is suspended in 100 mL Et2O. The mixture is stirred at room temperature for 30 mins and the color turned yellow. Subsequently, the mixture was filtered through a celite pad to obtain a clear yellow solution, which contained the carbene. The filtrate is then transferred to the glovebox freezer (−37 °C). Hexachloroethane (7.08 g, 30 mmol, 1.0 equiv.) was dissolved in Et2O in a round bottom flask and cooled down in the freezer as well. After both solutions are cooled in the freezer for 2h, the carbene solution is added dropwise to hexachloroethane solution over 30 minutes. Upon adding the carbene solution, white precipitates formed immediately. After carbene addition, the mixture was stirred for an additional 20 mins, then filtered through a fritted Buchner funnel (medium frit) and washed with Et2O to afford the target compound as a white solid. Yield 70% (3.49 g, 20.9 mmol). 1H NMR (400.06 MHz, CD2Cl2): δ = 8.37 (s, 2 H, CH), 4.03 (s, 6 H, CH3). 13C NMR (100.6 MHz, CD2Cl2): δ = 125.3 (CH), 36.8 (CH3).

**Supplementary Fig. 2.** 1H NMR spectrum (CD2Cl2, 298 K, 400 MHz) of 4-Cl.

**Supplementary Fig. 3.** 13C NMR spectrum (CD2Cl2, 298 K, 100 MHz) of 4-Cl.

2-chloro-1,3-diisopropyl-1H-imidazol-3-ium chloride (4-iPr-Cl):

Inside the glovebox, a round bottom flask was charged with 1,3-diisopropyl-1H-imidazol-3-ium chloride (8.00 g, 42.4 mmol, 1.0 equiv.), NaH (2.04 g, 84.8 mmol, 2.0 equiv.), and catalytic KOtBu (0.08 g, 0.7 mmol, 0.02 equiv.), and THF (100 mL) was then added to start the reaction. The mixture is stirred at room temperature for 4 h and gradually turned brown. Subsequently, the mixture was filtered through the celite to obtain a clear light brown solution, which contained the carbene. The filtrate is then transferred to the glovebox freezer (−37 °C). Hexachloroethane (11.0 g, 46.6 mmol, 1.1 equiv.) was dissolved in THF in another round bottom flask and cooled down in the freezer as well. After both solutions are cooled in the freezer for 2h, the carbene solution is added dropwise to hexachloroethane solution over 30 minutes. Upon adding the carbene solution, white precipitate formed immediately. After carbene addition, the mixture was stirred for an additional 20 mins, then filtered through a fritted Buchner funnel (medium frit) and washed with Et2O to afford the target compound as a white solid. Yield 89% (8.50 g, 37.9 mmol).

1H NMR (400.06 MHz, CD2Cl2): δ = 8.44 (s, 2 H, CH), 4.77 (m, 2 H, CH(CH3)2), 1.62 (d, 12 H, CH(CH3)2). 13C NMR (100.6 MHz, CD2Cl2): δ = 122.2 (CH), 53.8 (CH(CH3)2), 22.4 (CH(CH3)2). HRMS AccuTOF-DART for C9H16N2Cl [M+]: calc m/z = 187.1002; found m/z = 187.0999.

**Supplementary Fig. 4.** 1H NMR spectrum (CD2Cl2, 298 K, 400 MHz) of 4-iPr-Cl.


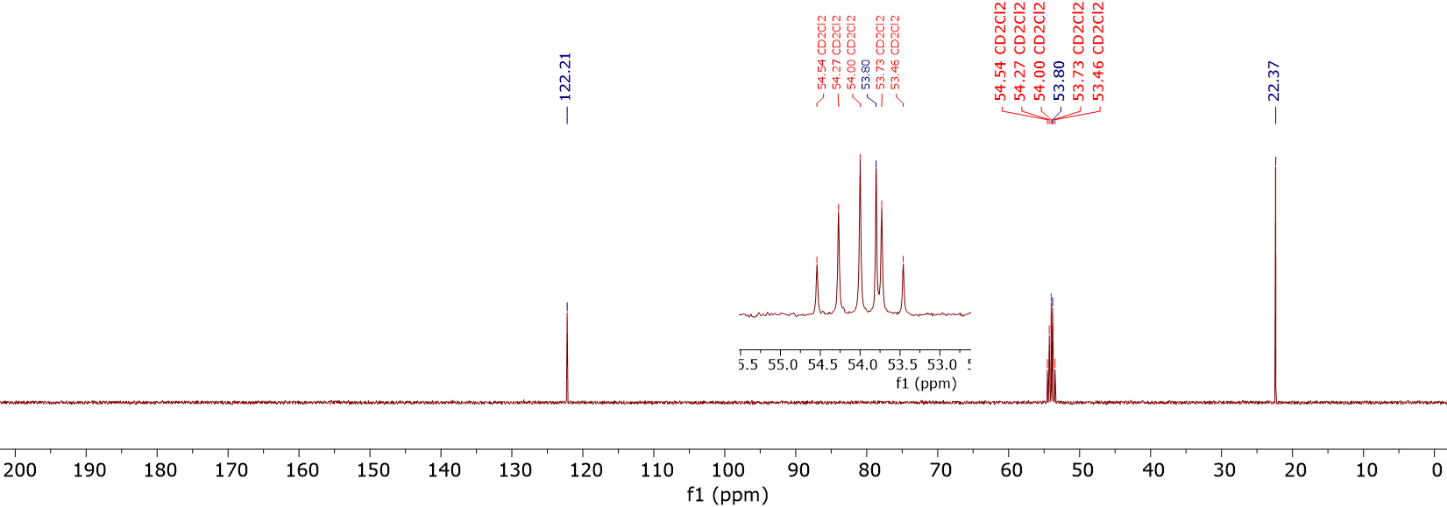


**Supplementary Fig. 5.** 13C NMR spectrum (CD2Cl2, 298 K, 100 MHz) of 4-iPr-Cl.

## Synthesis of N-heterocyclic iminium salts

The synthesis of the N-heterocyclic iminium salts generally follows the below general procedure (GP1) unless otherwise noted: A Schlenk flask was charged with 2-chloroazolium salt (1.00 equiv.) and KF (6.00 equiv.) inside the glovebox. Then, the flask was taken out of the glovebox and cycled onto the Schlenk line. MeCN (3 mL per mmol of the 2-chloroazolium salt) was added to form a suspension. Amine RNH2 or its hydrochloride salt RNH3Cl (3.00 equiv.) was then dissolved in 10 mL MeCN and added to the mixture. The reaction was stirred at room temperature for 24 h (for reactions using RNH2) or 120 h (for reactions using RNH3Cl). The resulting mixture was filtered with a fritted Buchner funnel (medium frit) and the solid residue was washed with CHCl3. The combined solution is extracted with aqueous solution containing sodium tetrafluoroborate (NaBF4). The organic phase was collected and the aqueous phase was washed two more times with CHCl3. The organic phases were then combined, dried over magnesium sulfate (MgSO4), filtered, and dried under reduced pressure to afford a colorless or yellow oil, which was triturated using Et2O to yield solid precipitates. The product was then recrystallized from ethyl acetate (EtOAc) and dried under vacuum at 80°C for 24 h.

Compound 1HBF4: Synthesis according to GP1 starting from 2-chloro-1,3-dimethylbenzimidazolium chloride (1.74 g, 8.06 mmol). Yield 84% (1.95 g, 6.70 mmol) as a white solid.

1H NMR (400.03 MHz, DMSO-d6): 7.81 (d, 1 H, NH), 7.39-7.67 (m, 4 H, ArH), 4.18 (m, 1 H, CH3CHCH3) 3.75 (s, 1 H, CH3), 1.35 (d, 6 H, CH3CHCH3).

13C NMR (100.6 MHz, DMSO-d6): 150.0 (NCN2), 130.7 (ArC), 124.0 (ArC), 110.8 (ArC), 48.0 (CH3CHCH3), 31.3 (CH3), 23.8 (CH3CHCH3).

HRMS AccuTOF-DART for C12H18N3 [M+]: calc m/z = 204.1501; found m/z = 204.1500.

**Supplementary Fig. 6.** 1H NMR spectrum (DMSO-d6, 298 K, 400 MHz) of 1HBF4.

**Supplementary Fig. 7.** 13C NMR spectrum (DMSO-d6, 298 K, 100 MHz) of 1HBF4.

Compound 3HPF6: Synthesis according to GP1, starting from 2-chloro-1,3-dimethyl-4,5-diphenyl-1H-imidazol-3-ium hexafluorophosphate (3.43 g, 8.00 mmol), except without adding NaBF4 during extraction and without recrystallization. Yield 96% (3.45 g, 7.64 mmol) as a white solid.

1H NMR (400.03 MHz, CD3CN): 7.40-7.45 (m, 6 H, ArH), 7.27-7.30 (m, 4 H, ArH), 5.21 (d, 1 H, NH), 3.80 (m, 1 H, CH3CHCH3), 3.41 (s, 6 H, CH3), 1.36 (d, 6 H, CH3CHCH3).

13C NMR (100.6 MHz, CD3CN): 147.5 (NCN2), 131.0 (ArC), 131.0 (ArC), 130.3 (ArC), 129.2 (ArC), 127.8 (ArC), 51.3 (CH3CHCH3), 34.0 (CH3), 24.5 (CH3CHCH3).

HRMS AccuTOF-DART for C20H24N3 [M+]: calc m/z = 306.1970; found m/z = 306.1984

**Supplementary Fig. 8.** 1H NMR spectrum (CDCl3, 298 K, 400 MHz) of 3HPF6.

**Supplementary Fig. 9.** 13C NMR spectrum (CDCl3, 298 K, 100 MHz) of 3HPF6.

Compound 4H-Cl: A Schlenk flask was charged with 2-chloro-1,3-dimethyl-1H-imidazol-3-ium chloride (5.00 g, 29.9 mmol, 1.00 equiv.) and KF (6.00 equiv.) inside the glovebox. Then, the flask was taken out of the glovebox and cycled onto the Schlenk line. MeCN (10 mL per mmol of the 2-chloroazolium salt) was added to form the suspension. Isopropyl amine (3.00 equiv.) was then dissolved in 10 mL MeCN and added to the mixture. The reaction was stirred at room temperature for 72 h. After the reaction, the mixture was filtered and the solvent was removed under reduced pressure to obtain a crude sticky yellow-brown solid. This product was extracted using DCM and filtered to remove un-dissolved impurities. The solvent was then evaporated, and the remaining solid is suspended in EtOAc. ~3 mL of isopropanol (iPrOH) was then added to dissolved the unreacted chloroazolium salt. A final filtration affords the solid product as a yellow solid, and it is dried under vacuum at 80°C overnight. Yield: 67% (3.80 g, 20.03 mmol)

1H NMR (400.03 MHz, CDCl3): δ = 8.48 (d, 1 H, NH), 6.86 (s, 2 H, CH), 3.77 (s, 6 H, CH3), 3.63 (m, 1 H, CH3CHCH3), 1.38 (d, 6 H, CH3CHCH3)

13C NMR (100.6 MHz, CDCl3): 147.1 (NCN2), 118.6 (CH), 49.6 (CH3CHCH3), 35.5 (CH3), 24.1 (CH3CHCH3).

HRMS AccuTOF-DART for C8H16N3 [M+]: calc m/z = 154.1344; found m/z = 154.1366.

**Supplementary Fig. 10.** 1H NMR spectrum (CDCl3, 298 K, 400 MHz) of 4HCl.

**Supplementary Fig. 11.** 13C NMR spectrum (CDCl3, 298 K, 100 MHz) of 4HCl.

Compound 4-iPr-MeH-BF4: Synthesis according to GP1 starting from 2-chloro-1,3-diisopropyl-1H-imidazol-3-ium chloride (1.80 g, 8.07 mmol). Yield 76% (1.65 g, 6.13 mmol) as a beige solid.

1H NMR (400.03 MHz, CDCl3): δ = 6.95 (s, 2 H, CH), 5.61 (q, 1 H, NH), 4.62 (m, 2 H, CH3CHCH3), 3.08 (d, 3 H, CH3), 1.44 (d, 12 H, CH3CHCH3)

13C NMR (100.6 MHz, CDCl3): 145.0 (NCN2), 114.2 (CH), 49.3 (CH3CHCH3), 33.9 (CH3), 22.6 (CH3CHCH3).

HRMS AccuTOF-DART for C10H20N3 [M+]: calc m/z = 182.1657; found m/z = 182.1658.

**Supplementary Fig. 12.** 1H NMR spectrum (CDCl3, 298 K, 400 MHz) of 4-iPr-MeH-BF4.

**Supplementary Fig. 13.** 13C NMR spectrum (CDCl3, 298 K, 100 MHz) of 4-iPr-MeH-BF4.

Compound 4-iPr-iPrH-BF4: Synthesis according to GP1 starting from 2-chloro-1,3-diisopropyl-1H-imidazol-3-ium chloride (5.50 g, 24.65 mmol). Yield 87% (6.35 g, 21.37 mmol) as a colorless solid.

1H NMR (400.03 MHz, CDCl3): δ = 7.10 (s, 2 H, CH), 5.16 (d, 1 H, NH), 4.64 (m, 2 H, CH3CHCH3), 3.46 (m, 1 H, CH3CHCH3), 1.45 (d, 12 H, CH3CHCH3), 1.27 (d, 6 H, CH3CHCH3).

13C NMR (100.6 MHz, CDCl3): 143.6 (NCN2), 115.1 (CH), 51.3 (CH3CHCH3), 49.3 (CH3CHCH3), 23.5 (CH3CHCH3), 22.9 (CH3CHCH3).

HRMS AccuTOF-DART for C12H24N3 [M+]: calc m/z = 210.1970; found m/z = 210.1970.

**Supplementary Fig. 14.** 1H NMR spectrum (CDCl3, 298 K, 400 MHz) of 4-iPr-iPrH-BF4.

**Supplementary Fig. 15.** 13C NMR spectrum (CDCl3, 298 K, 100 MHz) of 4-iPr-iPrH-BF4.

Compound 4-iPr-tBuH-BF4: Synthesis according to GP1 starting from 2-chloro-1,3-diisopropyl-1H-imidazol-3-ium chloride (2.00 g, 8.96 mmol). Yield 86% (2.40 g, 7.72 mmol) as a colorless solid.

1H NMR (400.03 MHz, CDCl3): δ = 7.21 (s, 2 H, CH), 4.79 (m, 2 H, CH3CHCH3), 4.68 (s, 1 H, NH), 1.45 (d, 12 H, CH3CHCH3), 1.27 (s, 9 H, C(CH3)3).

13C NMR (100.6 MHz, CDCl3): 142.0 (NCN2), 116.5 (CH), 56.3 (C(CH3)3), 50.0 (CH3CHCH3), 30.9 (C(CH3)3), 23.0 (CH3CHCH3).

HRMS AccuTOF-DART for C13H26N3 [M+]: calc m/z = 224.2127; found m/z = 224.2123.

**Supplementary Fig. 16.** 1H NMR spectrum (CDCl3, 298 K, 400 MHz) of 4-iPr-tBuHBF4.

**Supplementary Fig. 17.** 13C NMR spectrum (CDCl3, 298 K, 100 MHz) of 4-iPr-tBuHBF4.

Compound 4-tBuH-BF4: Synthesis according to GP1 starting from 2-chloro-1,3-ditertbutyl-1H-imidazol-3-ium chloride (3.00 g, 11.19 mmol). Yield 86% (3.35 g, 10.30 mmol) as a colorless solid.

1H NMR (400.03 MHz, CDCl3): δ = 7.26 (s, 2 H, CH), 4.16 (s, 1 H, NH), 3.79 (m, 1 H, CH3CHCH3), 1.70 (s, 18 H, C(CH3)3), 1.17 (d, 6 H, CH3CHCH3).

13C NMR (100.6 MHz, CDCl3): 143.5 (NCN2), 117.2 (CH), 62.5 (C(CH3)3), 50.0 (CH3CHCH3), 30.3 (C(CH3)3), 22.4 (CH3CHCH3).

HRMS AccuTOF-DART for C14H28N3 [M+]: calc m/z = 238.2283; found m/z = 238.2285.

**Supplementary Fig. 18.** 1H NMR spectrum (CDCl3, 298 K, 400 MHz) of 4-tBu-HBF4.

**Supplementary Fig. 19.** 13C NMR spectrum (CDCl3, 298 K, 100 MHz) of 4-tBuH-BF4.

Compound 5HBF4: Synthesis according to GP1 starting from 2-chloro-1,3,4,5-tetramethyl-1H-imidazol-3-ium chloride (1.00 g, 5.13 mmol). Yield 81% (1.12 g, 4.16 mmol) as a pale yellow solid.

1H NMR (400.03 MHz, CDCl3): 5.19 (b, 1 H, N-H), 3.52 (s, 6 H, NCH­3), 3.50 (m, 1 H, CH3CHCH3), 2.14 (s, 6H, CH3), 1.26 (d, 6H, CH3CHCH3).

13C NMR (100.6 MHz, CDCl3): 145.0 (NCN2), 122.2 (CH), 50.2 (CH3CHCH3), 31.4 (NCH3), 23.7 (CH3CHCH3), 8.9 (CH3).

HRMS AccuTOF-DART for C10H20N3 [M+]: calc m/z = 182.1657; found m/z = 182.1667.

**Supplementary Fig. 20.** 1H NMR spectrum (CDCl3, 298 K, 400 MHz) of 5H-BF4.

**Supplementary Fig. 21.** 13C NMR spectrum (CDCl3, 298 K, 100 MHz) of 5H-BF4.

## Synthesis of NHI

The synthesis of the N-heterocyclic imine from N-heterocyclic iminium salts follows the general procedure (GP2) below: Inside the glovebox, a round bottom flask was charged with N-heterocyclic imine salt (1.00 equiv.). Then, THF was added as the reaction solvent. KOtBu (0.98 equiv.) was dissolved in THF and then added dropwise to the reaction mixture. The solution was stirred at room temperature for 2 h, and the solvent was evaporated. Hexane was added to the crude product to extract the N-heterocyclic imine. The mixture was then filtered through a celite pad on fritted Buchner funnel (medium frit). The filtrate was then evaporated to obtain the final N-heterocyclic imine product.

Compound 1: Synthesis according to GP2 starting from 1H-BF4 (1.50 g, 5.15 mmol). Yield 89% (0.91 g, 4.57 mmol) as a yellow solid.

1H NMR (400.03 MHz, DMSO-d6): 6.81-6.86 (m, 4 H, ArH), 4.27 (m, 1 H, CH3CHCH3) 3.32 (s, 1 H, CH3), 1.13 (d, 6 H, CH3CHCH3).

13C NMR (100.6 MHz, DMSO-d6): 144.2 (NCN2), 133.3 (ArC), 119.5 (ArC), 105.2 (ArC), 44.1 (CH3CHCH3), 31.3 (CH3), 23.8 (CH3CHCH3).

HRMS AccuTOF-DART for C12H17N3 [M+H]: calc m/z = 204.1501; found m/z = 204.1510.

**Supplementary Fig. 22.** 1H NMR spectrum (DMSO-d6, 298 K, 400 MHz) of 1.

**Supplementary Fig. 23.** 13C NMR spectrum (DMSO-d6, 298 K, 100 MHz) of 1.

Compound 3: Synthesis according to GP2 starting from 3H-PF6 (1.20 g, 2.66 mmol). Yield 82% (0.66 g, 2.17 mmol) as a yellow solid.

1H NMR (400.03 MHz, DMSO-d6): 7.23-7.31 (m, 6 H, ArH), 7.14-7.15 (m, 4 H, ArH), 4.08 (m, 1 H, CH3CHCH3), 3.02 (s, 6 H, CH3), 1.13 (d, 6 H, CH3CHCH3).

13C NMR (100.6 MHz, DMSO-d6): 148.0 (NCN2), 129.7 (ArC), 129.4 (ArC), 128.5 (ArC), 127.3 (ArC), 123.2 (ArC), 45.2 (CH3CHCH3), 32.1 (CH3), 27.2 (CH3CHCH3).

HRMS AccuTOF-DART for C20H23N3 [M+H]: calc m/z = 306.1970; found m/z = 306.1971

**Supplementary Fig. 24.** 1H NMR spectrum (DMSO-d6, 298 K, 400 MHz) of 3.

**Supplementary Fig. 25.** 13C NMR spectrum (DMSO-d6, 298 K, 100 MHz) of 3.

Compound 4: Synthesis according to GP2 starting from 4H-Cl (1.50 g, 7.91 mmol). Yield 62% (0.74 g, 4.83 mmol) as a colorless liquid.

1H NMR (400.03 MHz, DMSO-d6): δ = 6.13 (s, 2 H, CH), 4.05 (m, 1 H, CH3CHCH3), 3.11 (s, 6 H, CH3), 1.02 (d, 6 H, CH3CHCH3)

13C NMR (100.6 MHz, DMSO-d6): 145.7 (NCN2), 113.3 (CH), 49.3 (CH3CHCH3), 33.1 (CH3), 27.5 (CH3CHCH3).

HRMS AccuTOF-DART for C8H15N3 [M+H]: calc m/z = 154.1344; found m/z = 154.1364.

**Supplementary Fig. 26.** 1H NMR spectrum (DMSO-d6, 298 K, 400 MHz) of 4.

**Supplementary Fig. 27.** 13C NMR spectrum (DMSO-d6, 298 K, 100 MHz) of 4.

Compound 4-iPr-Me: Synthesis according to GP2 starting from 4-iPr-MeH-BF4 (1.50 g, 5.57 mmol). Yield 88% (0.88 g, 4.88 mmol) as a colorless liquid.

1H NMR (400.03 MHz, DMSO-d6): δ = 6.34 (s, 2 H, CH), 4.43 (m, 2 H, CH3CHCH3), 3.11 (s, 3 H, CH3), 1.15 (d, 12 H, CH3CHCH3)

13C NMR (100.6 MHz, DMSO-d6): 146.5 (NCN2), 108.2 (CH), 44.4 (CH3CHCH3), 34.4 (CH3), 21.8 (CH3CHCH3).

HRMS AccuTOF-DART for C10H19N3 [M+H]: calc m/z = 182.1657; found m/z = 182.1668.

**Supplementary Fig. 28.** 1H NMR spectrum (CDCl3, 298 K, 400 MHz) of 4-iPr-Me.

**Supplementary Fig. 29.** 13C NMR spectrum (CDCl3, 298 K, 100 MHz) of 4-iPr-Me.

Compound 4-iPr-iPr: Synthesis according to GP2 starting from 4-iPr-iPrH-BF4 (5.50 g, 18.5 mmol). Yield 78% (3.01 g, 14.4 mmol) as a colorless liquid.

1H NMR (400.03 MHz, DMSO-d6): δ = 6.31 (s, 2 H, CH), 4.27 (m, 2 H, CH3CHCH3), 3.88 (m, 1 H, CH3CHCH3), 1.15 (d, 12 H, CH3CHCH3), 1.03 (d, 6 H, CH3CHCH3).

13C NMR (100.6 MHz, DMSO-d6): 143.4 (NCN2), 108.0 (CH), 44.6 (CH3CHCH3), 44.4 (CH3CHCH3), 26.9 (CH3CHCH3), 21.5 (CH3CHCH3).

HRMS AccuTOF-DART for C12H23N3 [M+H]: calc m/z = 210.1970; found m/z = 210.1974.

**Supplementary Fig. 30.** 1H NMR spectrum (DMSO-d6, 298 K, 400 MHz) of 4-iPr-iPr.

**Supplementary Fig. 31.** 13C NMR spectrum (DMSO-d6, 298 K, 100 MHz) of 4-iPr-iPr.

Compound 4-iPr-tBu: Synthesis according to GP2 starting from 4-iPr-tBuH-BF4 (1.20 g, 3.86 mmol). Yield 90% (0.77 g, 3.47 mmol) as a colorless solid.

1H NMR (400.03 MHz, DMSO-d6): δ = 6.34 (s, 2 H, CH), 4.31 (m, 2 H, CH3CHCH3), 1.23 (s, 9 H, C(CH3)3), 1.12 (d, 12 H, CH3CHCH3),

13C NMR (100.6 MHz, DMSO-d6): 141.9 (NCN2), 108.3 (CH), 49.6 (C(CH3)3), 44.9 (CH3CHCH3), 32.2 (C(CH3)3), 21.1 (CH3CHCH3).

HRMS AccuTOF-DART for C13H25N3 [M+H]: calc m/z = 224.2127; found m/z = 224.2125.

**Supplementary Fig. 32.** 1H NMR spectrum (DMSO-d6, 298 K, 400 MHz) of 4-iPr-tBu.

**Supplementary Fig. 33.** 13C NMR spectrum (DMSO-d6, 298 K, 100 MHz) of 4-iPr-tBu.

Compound 4-tBu: Synthesis according to GP2 starting from 4-tBuH-BF4 (2.75 g, 8.46 mmol). Yield 95% (1.90 g, 8.00 mmol) as a colorless liquid.

1H NMR (400.03 MHz, DMSO-d6): δ = 6.21 (s, 2 H, CH), 4.06 (m, 1 H, CH3CHCH3), 1.44 (s, 18 H, C(CH3)3), 1.05 (d, 6 H, CH3CHCH3).

13C NMR (100.6 MHz, DMSO-d6): 141.0 (NCN2), 107.7 (CH), 53.8 (C(CH3)3), 46.8 (CH3CHCH3), 28.8 (C(CH3)3), 26.2 (CH3CHCH3).

HRMS AccuTOF-DART for C14H27N3 [M+H]: calc m/z = 238.2283; found m/z = 238.2293.

**Supplementary Fig. 34.** 1H NMR spectrum (DMSO-d6, 298 K, 400 MHz) of 4-tBu.

**Supplementary Fig. 35.** 13C NMR spectrum (DMSO-d6, 298 K, 100 MHz) of 4-tBu.

Compound 5: Synthesis according to GP2 starting from 5HBF4 (0.52 g, 1.93 mmol). Yield 89% (0.31 g, 1.71 mmol) as a light-yellow liquid.

1H NMR (400.03 MHz, DMSO-d6): δ = 4.05 (m, 1 H, CH3CHCH3), 3.02 (s, 6 H, NCH­3), 1.86 (s, 6H, CH3), 1.02 (d, 6H, CH3CHCH3).

13C NMR (100.6 MHz, DMSO-d6): 146.4 (NCN2), 113.8 (CH), 44.2 (CH3CHCH3), 29.6 (NCH3), 21.8 (CH3CHCH3), 8.7 (CH3).

HRMS AccuTOF-DART for C10H19N3 [M+H]: calc m/z = 182.1657; found m/z = 182.1667.

**Supplementary Fig. 36.** 1H NMR spectrum (DMSO-d6, 298 K, 400 MHz) of 5.

**Supplementary Fig. 37.** 13C NMR spectrum (DMSO-d6, 298 K, 100 MHz) of 5.

## Synthesis of redox-reversible NHI (6)

A Schlenk flask was charged with p-phenylenediamine dihydrochloride (0.65 g, 3.60 mmol, 1 equiv.), 4-iPr-Cl (2.42 g, 10.8 mmol, 3.00 equiv.), and KF (3.76 g, 64.8 mmol, 18.0 equiv.) inside the glovebox. Then, the flask was taken out of the glovebox and transferred to the Schlenk line, where 100 mL MeCN was added to form a suspension. The flask is subsequently placed in an ice bath, and triethylamine (1.82 g, 18.0 mmol, 5 equiv.) was added dropwise. The reaction was then stirred at room temperature for 48 h and dried under reduced pressure and the resulting sticky residue was re-dissolved in 10% HCl. After addition of 50% KOH, solid precipitation occurs. The product was extracted with ethyl acetate (3 × 100 mL), dried with K2CO3, and the solvent is removed under vacuum. The crude product is recrystallized from hot MeCN twice, and the resulting crystalline solid is dried under vacuum at 60°C for 72 h to remove the co-crystallized MeCN. Note that the recrystallization and drying steps are important for obtaining pure, solvent-free products, as trace solvent and impurities can significantly affect cell cycling performances. Yield 69% (1.02 g, 2.50 mmol) as a white solid.

1H NMR (400.03 MHz, MeCN-d3): δ = 6.54 (s, 4 H, CH), 6.45 (s, 4 H, ArH), 4.26 (m, 4 H, CH3CHCH3), 1.15 (d, 24 H, 4×CH3CHCH3).

13C NMR (100.6 MHz, MeCN-d3): 146.5 (NCN2), 144.9 (N-C), 122.4 (ArC), 109.8 (CH), 46.1 (CH3CHCH3), 21.7 (CH3CHCH3).

HRMS AccuTOF-DART for C24H36N3 [M]: calc m/z = 408.3001; found m/z = 408.3012.

**Supplementary Fig. 38.** 1H NMR spectrum (MeCN-d3, 298 K, 400 MHz) of 6.

**Supplementary Fig. 39.** 13C NMR spectrum (MeCN-d3, 298 K, 100 MHz) of 6.

# Supplementary Methods

## Experimental details for reaction enthalpy measurements

The stainless-steel sample vial is connected with two 1/16" tubes as the inlet (with an inline flow controller to purge CO2) and outlet (vent). After loading the sample vial into the calorimeter, the system was allowed to equilibrate until the temperature stabilized at 25.000°C, with signal fluctuations maintained within 0.01 mW. To preserve an inert atmosphere, both the inlet and outlet were initially connected to a sealed valve. Once thermal and power equilibrium were achieved, the inlet was connected to the gas flow panel to introduce CO₂, while the outlet was directed to a local ventilation system. For the experiments using MeCN as the solvent, an additional bubbler was added to the inlet tubing such that CO2 was saturated with solvent vapor before entering the sample vial to prevent MeCN evaporation.

## Sample preparation for NHI-CO2 loading determination

For experiments using DMI and DMSO as the solvent (Figs 2c, Fig 2d, Fig 2e, **Supplementary Fig. 40**, and **Supplementary Fig. 42**), the vial was initially purged with a desired concentration of CO2 until the atmosphere inside the vial was fully exchanged with purging gas. Subsequently, the sorbent solution was then injected into the vial through a syringe, and the weight difference of the syringe was measured to precisely quantify the amount of sorbent injected. For experiments using MeCN as the solvent (Fig. 4d, **Supplementary Fig. 47**,and **Supplementary Fig. 49**), the sample was pre-loaded in a gas-tight vial in an Ar glovebox and subsequently purged with desired concentration of CO2. Additionally, the inlet gas is purged through a MeCN bubbler to saturate the gas with MeCN vapor to prevent solvent evaporation and the outlet gas was routed to a DMSO bubbler to trap the MeCN vapor, which has overlap IR absorption with CO₂ (4.2–4.3 μm) and could interfere with CO₂ sensor reading.

## Calculation of Faradaic efficiency (FE)

During a state-of-charge (SOC) swing experiment (Fig 5b), the change in CO₂ concentration, monitored using a CO₂ sensor, was used to quantify the Faradaic efficiency (FE) (**Supplementary Figs. 51–56**). A baseline for the integration was defined by two reference points: the average CO₂ concentration at the beginning of the measurement and the average concentration after the signal relaxed back to equilibrium at the end of the measurement. Due to minor sensor drift over time, this baseline is not strictly horizontal. The resulting peak was integrated to obtain the integrated area (Apeak), and the total amount of measured CO₂ captured or released (nCO2, measured) was then calculated using the following equation:

(S1)

where is the mass flow rate of 15% CO2 (2 sccm), *P* is the pressure, *R* is the ideal gas constant, and *T* is the temperature. Theoretical amount of CO2 captured or release (nCO2, theory) was calculated using the following equation:

(S2)

where Q is the total charge passed during the experiment (C) and F is the Faradaic constant (C/mol). The FE is then calculated by:

(S3)

# Supplementary Figures and Tables

*CO2 loadings of NHI:*

The CO2 loadings on NHI were measured separately at 0.1 M concentration under 100% CO2 to mimic the conditions used for microcalorimetry (Fig. 2a). Due to the fluctuation of the baseline signal originating from solution bubbling (**Supplementary Fig. 40a**), the average values of dissolved CO2 over 25 minutes are reported. The result indicated CO2 loadings of 0.12 mmol, 0.21 mmol, and 0.22 mmol in DMSO, 0.1 M **3** in DMSO, and 0.1 M **4** in DMSO, respectively (**Supplementary Fig. 40b**). This corresponds to CO2 loadings of 0.88 and 1.01 mol CO2/mol NHI for **3** and **4** respectively, at µRC testing conditions. Since **4** reached the theoretical maximum CO2 loading (1 mol CO2/mol NHI), the rest of NHIs in this study with more negative reaction enthalpies (*i.e.*, stronger binding), are assumed to have a loading of 1 mol CO2/mol NHI.


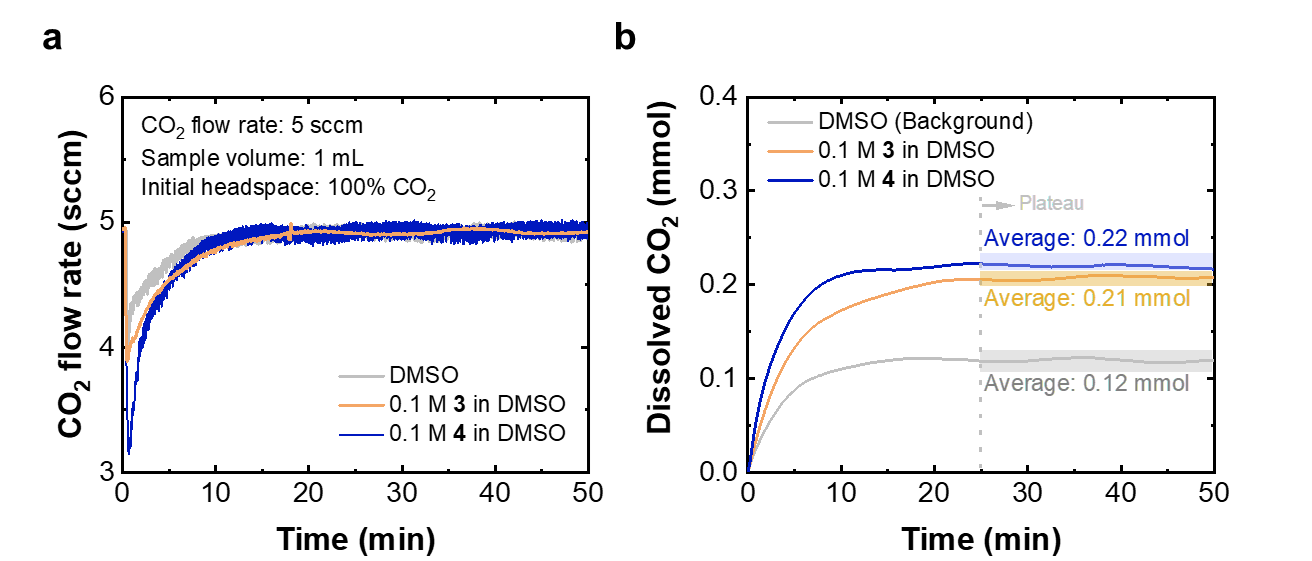


**Supplementary Fig. 40.** **a.** CO2 flow rate versus time after the injection of 1 mL solution: DMSO, 0.1 M **3** in DMSO, 0.1 M **4** in DMSO. Testing condition: 5 sccm CO2 and initial headspace of 100% CO2. **b.** Integrated amount of dissolved CO2 in the solution over time.

*The effect of solvent on* ∆HNHI-CO2 *with* ***4-iPr-iPr*** *as a representative NHI structure:*

The heat of CO2 dissolution (∆HCO2) for three solvents, including dimethyl sulfoxide (DMSO), MeCN, and dimethylformamide (DMF), were measured and normalized based on the CO2 solubility reported in literature.5 The ∆HCO2 values are used for background subtraction to determine ∆HNHI-CO2. With **4-iPr-iPr** as a representative NHI, **Supplementary Fig. 41** shows that the solvent choice does not significantly affect ∆HNHI-CO2.


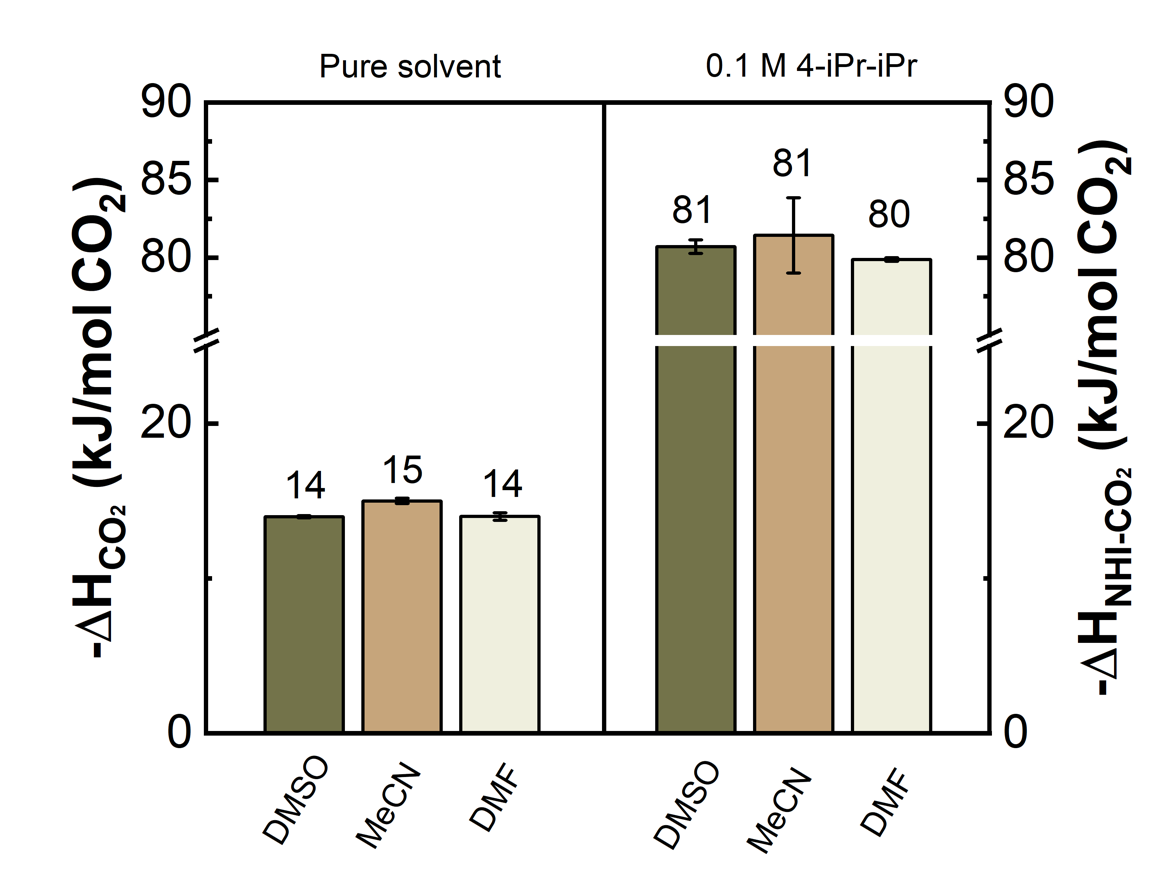


**Supplementary Fig. 41.** ∆HCO2 for DMSO, MeCN, and DMF and ∆HNHI-CO2 of **4-iPr-iPr** in these solvents.


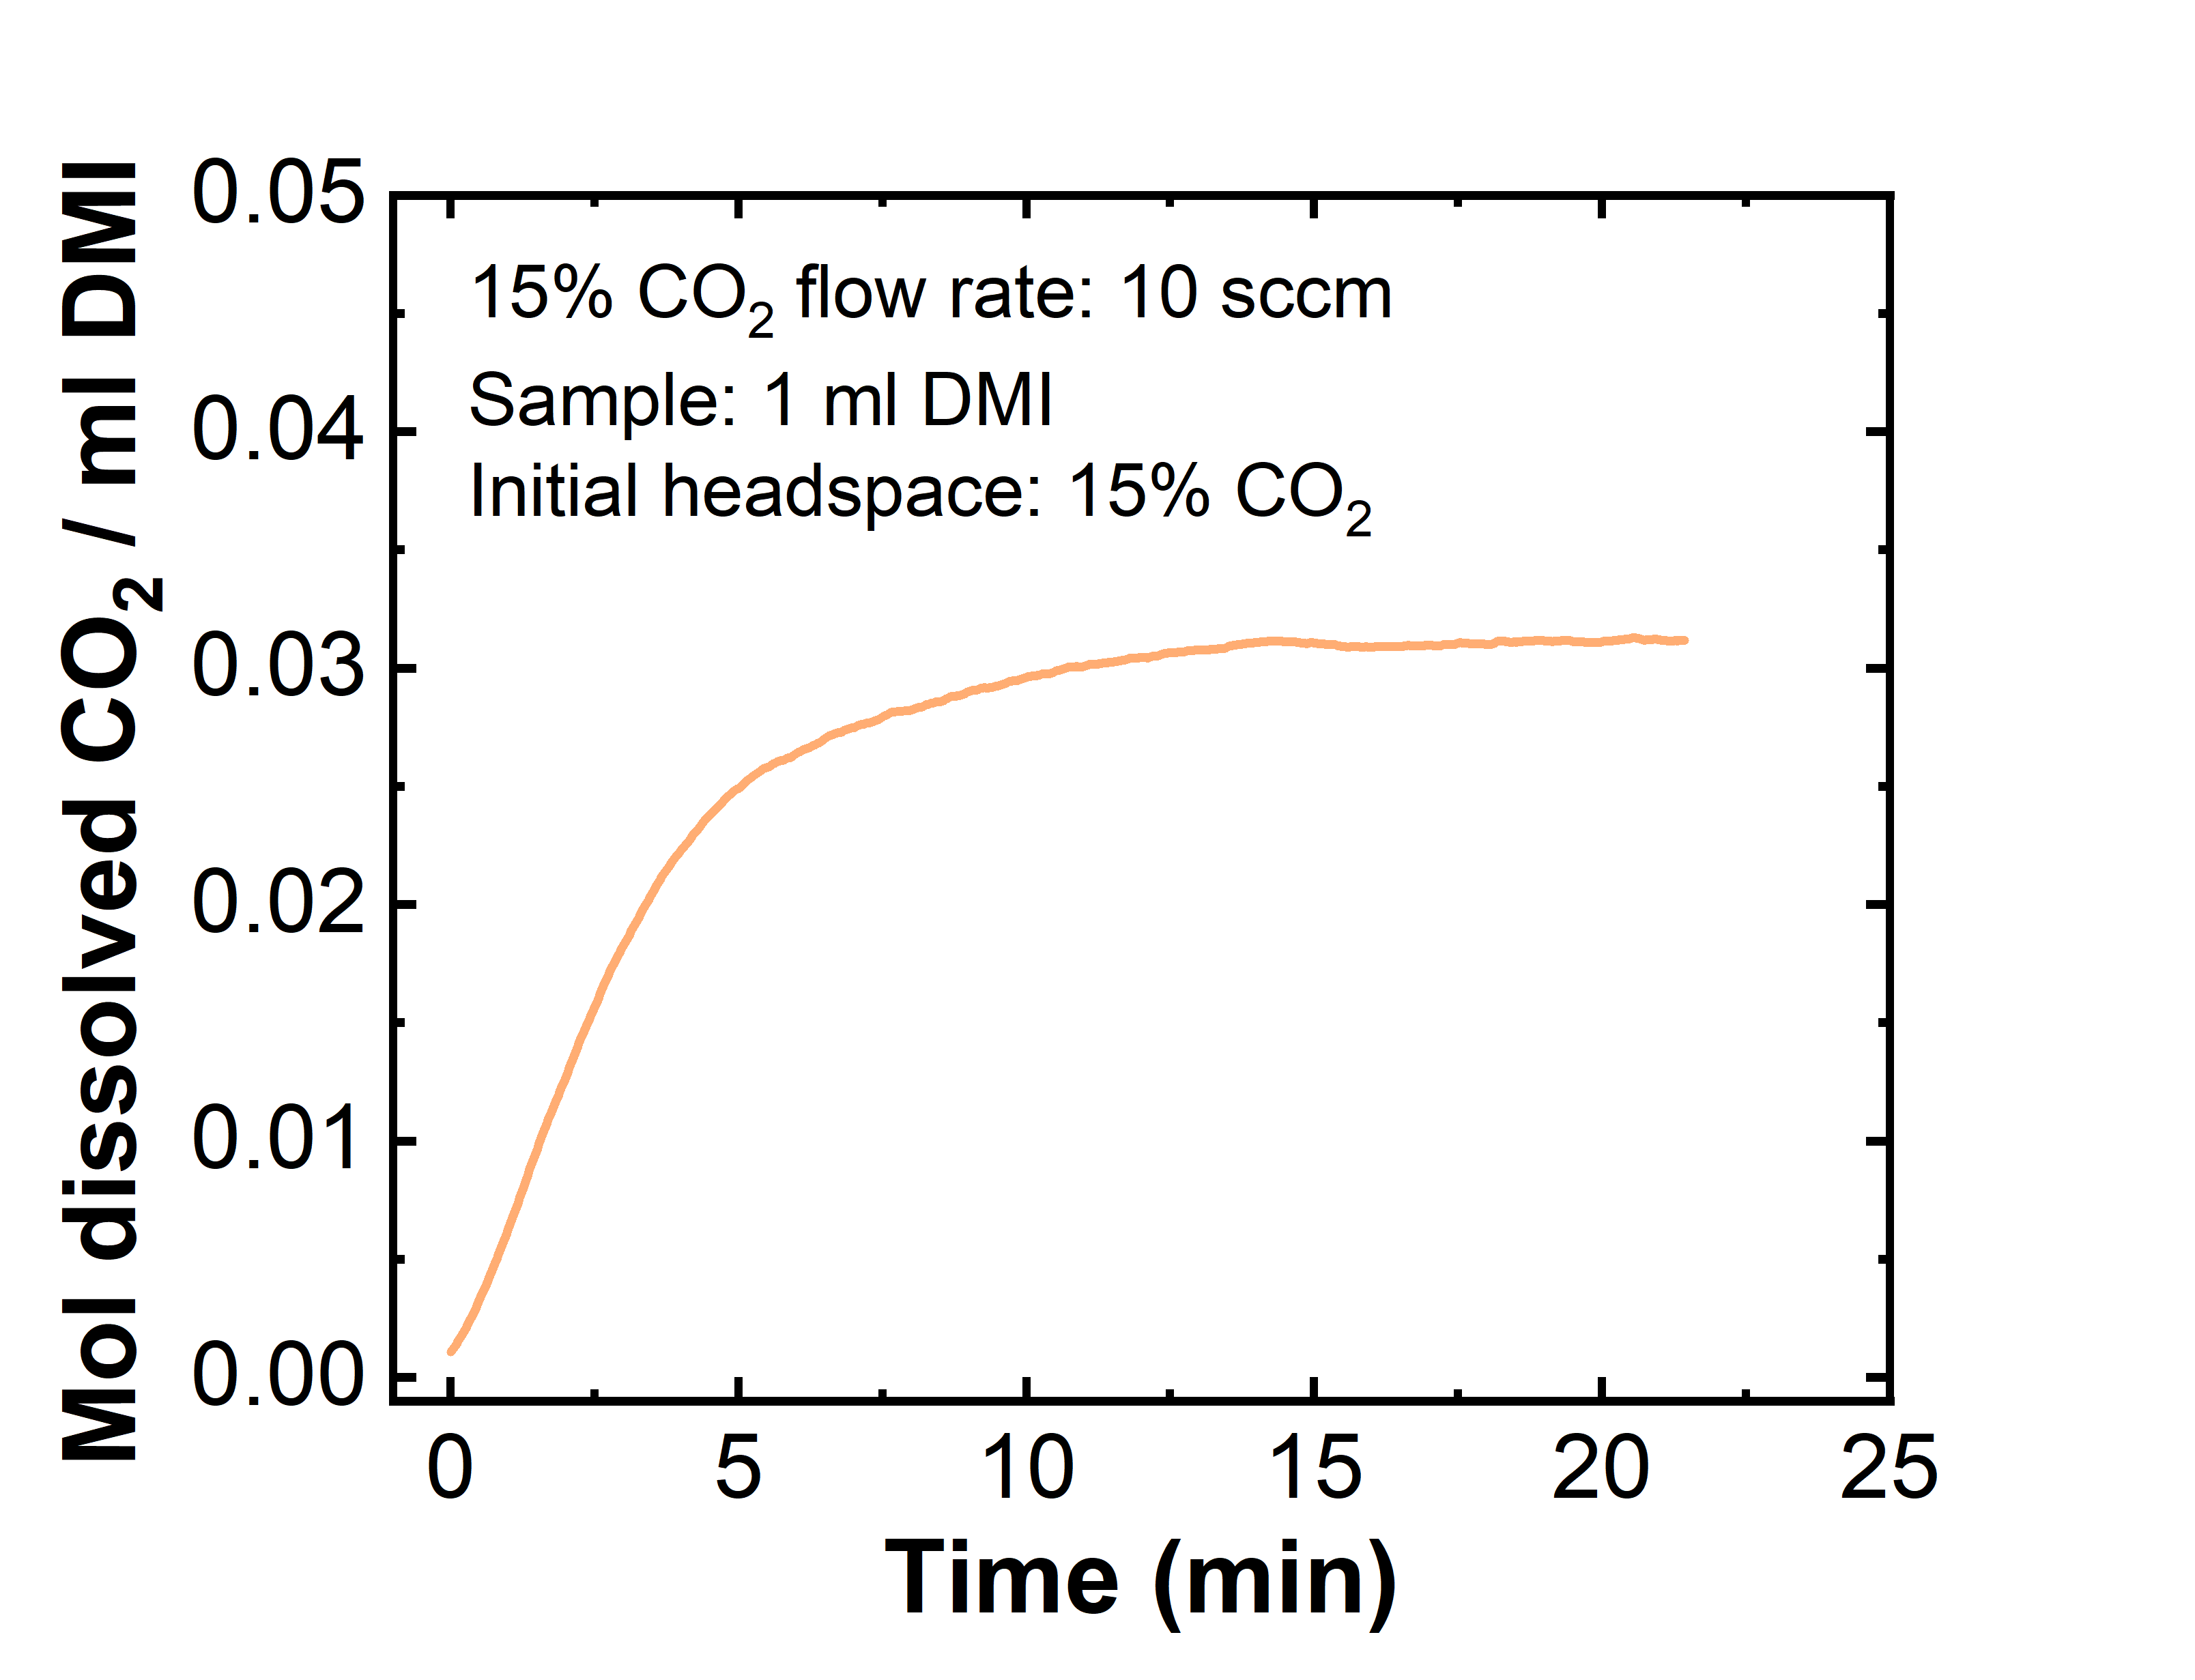


**Supplementary Fig. 42.** Background CO2 solubility in 1 mL DMI at 15% CO2. Testing condition: 1 mL of DMI, 10 sccm 15% CO2, and initial headspace of 15% CO2.

**
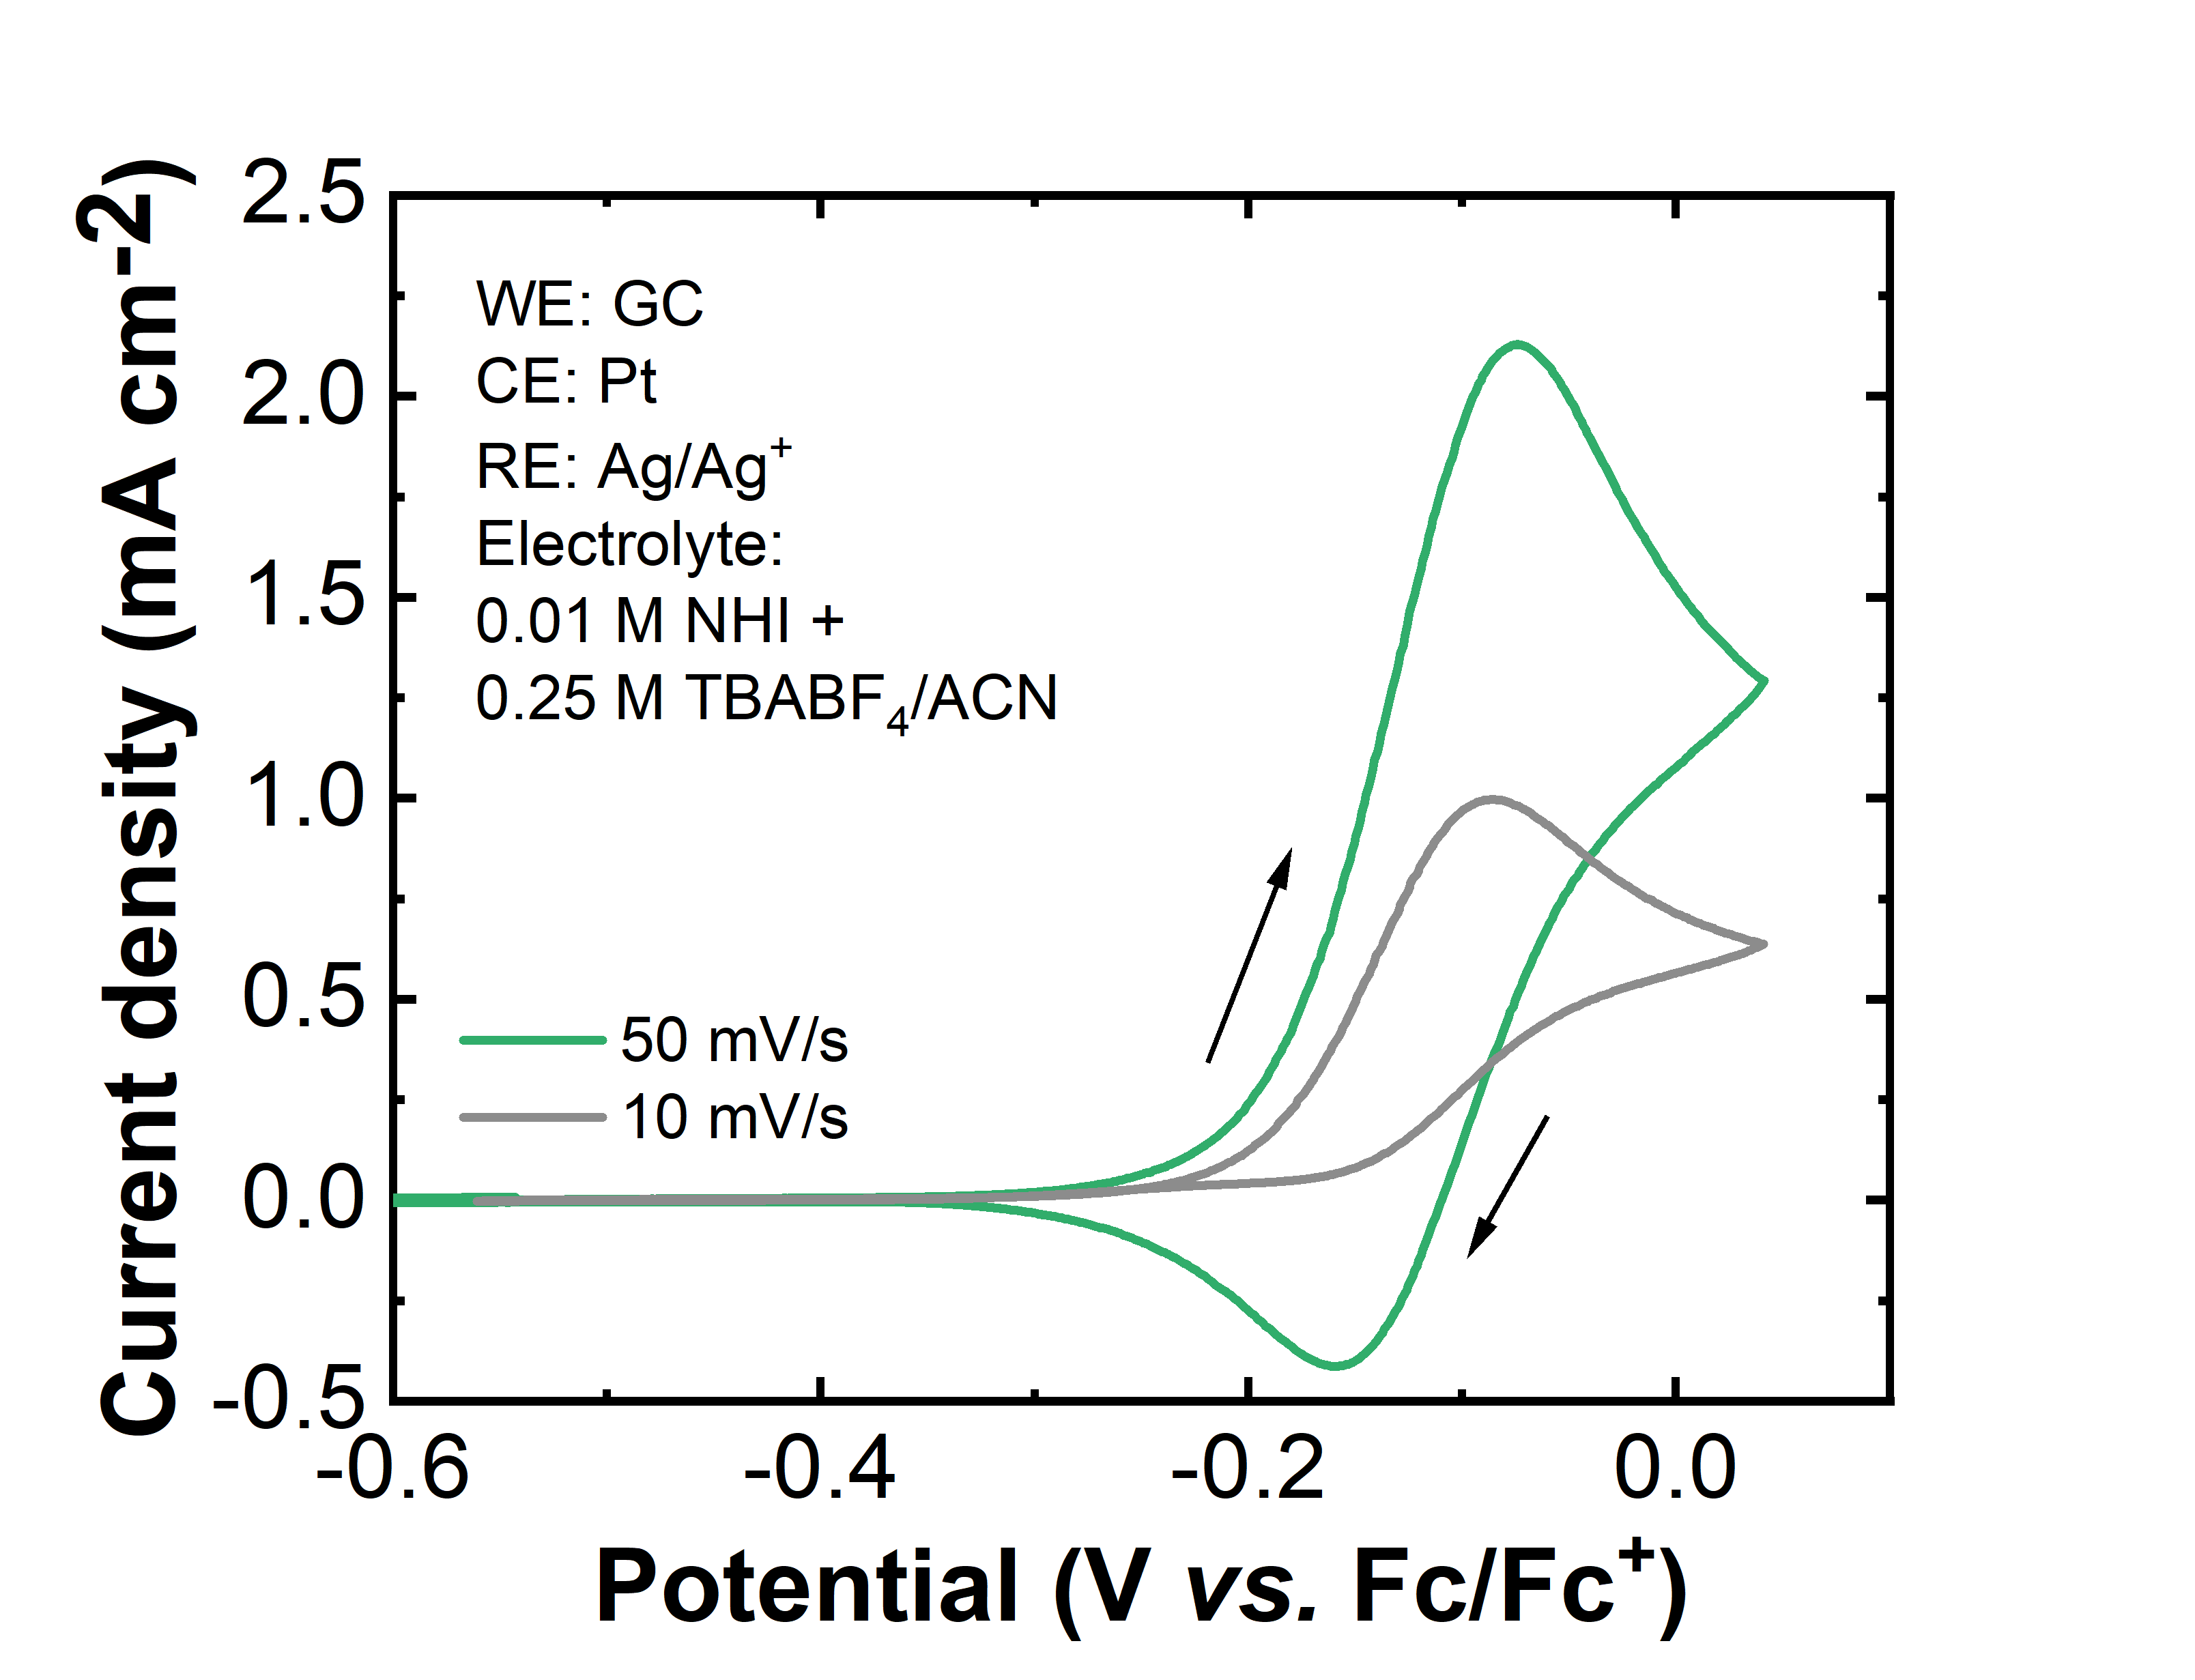
**

**Supplementary Fig. 43.** Cyclic voltammetry of **3** under Ar at a scan rate of 10 mV/s and 50 mV/s. The scan starts at open-circuit voltage (OCV), which is -0.55 V *vs.* Fc/Fc+, and first scans positively. Working electrode: glassy carbon (GC), counter electrode: Pt, and reference electrode: Ag/Ag+. Electrolyte contains 0.01 M NHI + 0.25 M TBABF4 in acetonitrile.

*Evidence of CO2 release after electro-oxidation with* ***4-iPr-iPr*** *as a representative NHI:*

Compound **4-iPr-iPr** was used as the model NHI for this experiment. The H-cell contained NHI-CO2 as the anolyte to be oxidized (0.2 M NHI + 0.25 M TBABF4 in MeCN saturated with 100% CO2) and 0.2 M TEMPO + 0.25 M TBABF4 in MeCN as the catholyte to be reduced for charge balance, as shown in **Supplementary Fig. 44a**. Carbon paper was used for both cathode and anode and a Ag/Ag+ reference electrode was used to record the applied potential during the experiment. The H-cell was sealed with septa under Ar as the initial headspace to ensure air-tightness, and an outlet was connected to the working electrode side to route released gas to a flow meter and CO2 sensor. During the experiment, a constant current of 5 mA was passed to the working electrode to oxidize NHI-CO2. The experiment was designed to pause the current every 60 minutes and rest for 10 minutes to confirm the outlet gas flow difference with and without current. As shown in **Supplementary Fig. 44b**, the resulting potential was stable during oxidation around the peak oxidation potential as observed from the CV measurement of **4-iPr-iPr** (Fig 4, purple curve). An increase of the CO2 flow rate of ~0.08 sccm, compared to the resting case, was observed when 5 mA current was applied (**Supplementary Fig. 44c**). Assuming 1 e- oxidation per NHI-CO2, we calculate a theoretical CO2 release of 0.076 sccm. Therefore, this experiment confirms that the single electron oxidation of NHI-CO2 corresponds to CO2 release near 100% Faradaic efficiency (FE).


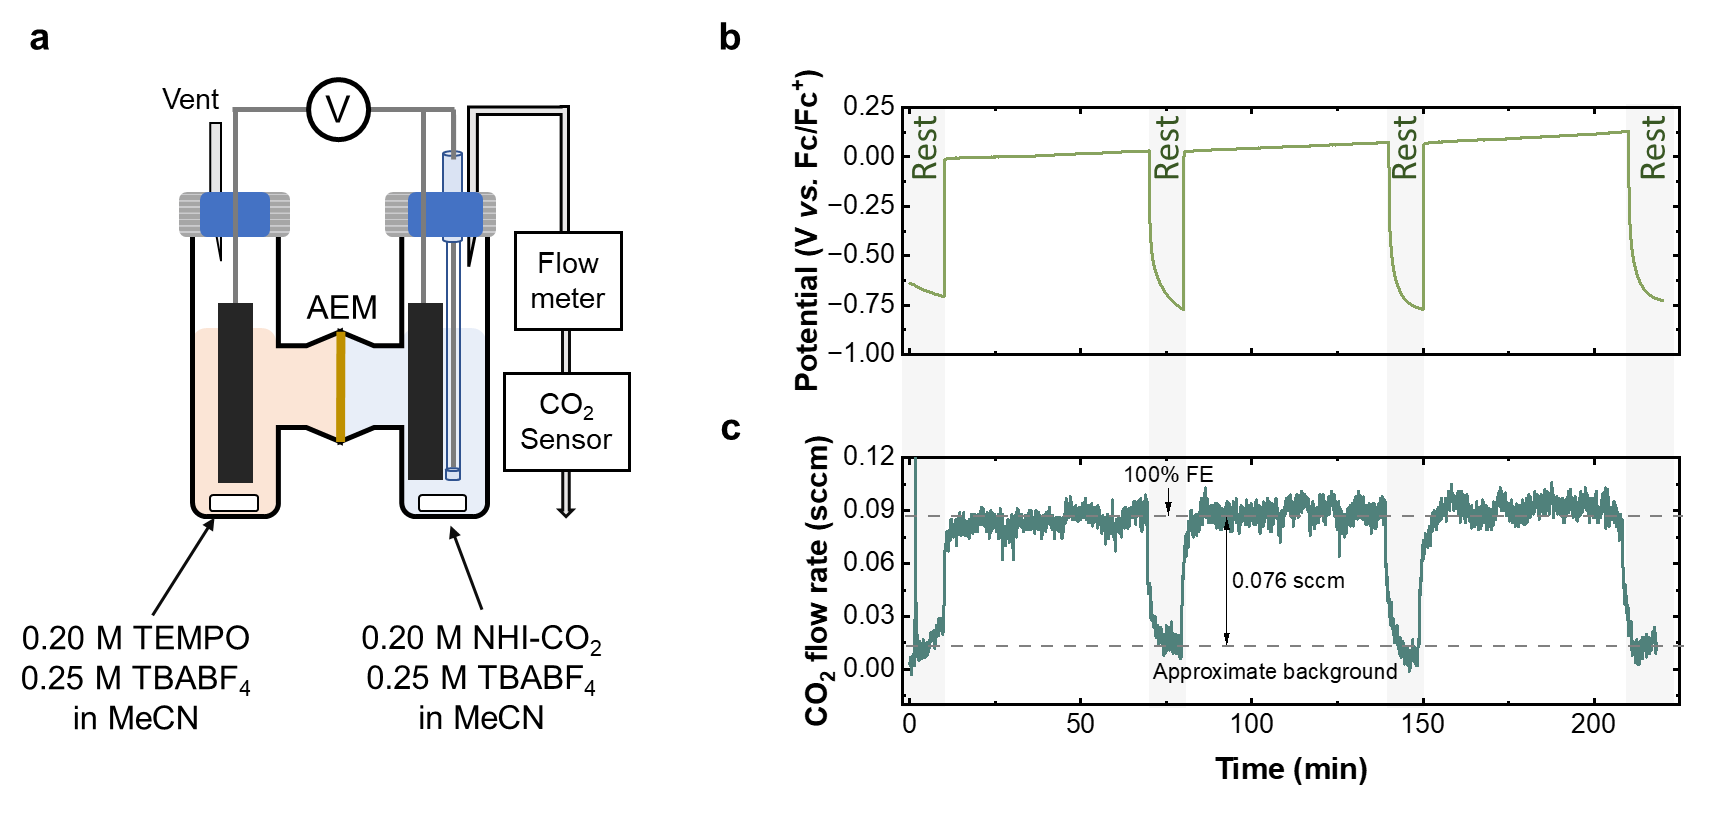


**Supplementary Fig. 44.** **a.** Schematic of the experimental setup for CO2 release. The H-cell contained NHI-CO2 solution (**4-iPr-iPr** with 0.25 TBABF4 in MeCN) that was oxidized at constant 5 mA current at room temperature while connected to the gas ﬂow meter and an FT-IR CO2 sensor. TEMPO catholyte (0.2 M TEMPO + 0.25 M TBABF4 in MeCN) was reduced for charge balance. Both electrodes were carbon paper, and a Ag/Ag+ reference electrode was used to reference the NHI potential to Fc/Fc+ (Fc/Fc+ = 0.06 V *vs.* Ag/Ag+). **b.** Potential measured during **4-iPr-iPr** oxidation, with intermittent rest periods to measure the CO2 release rate difference between active oxidation *vs.* under no applied current. **c.** The corresponding CO2 outlet flow rate versus time.


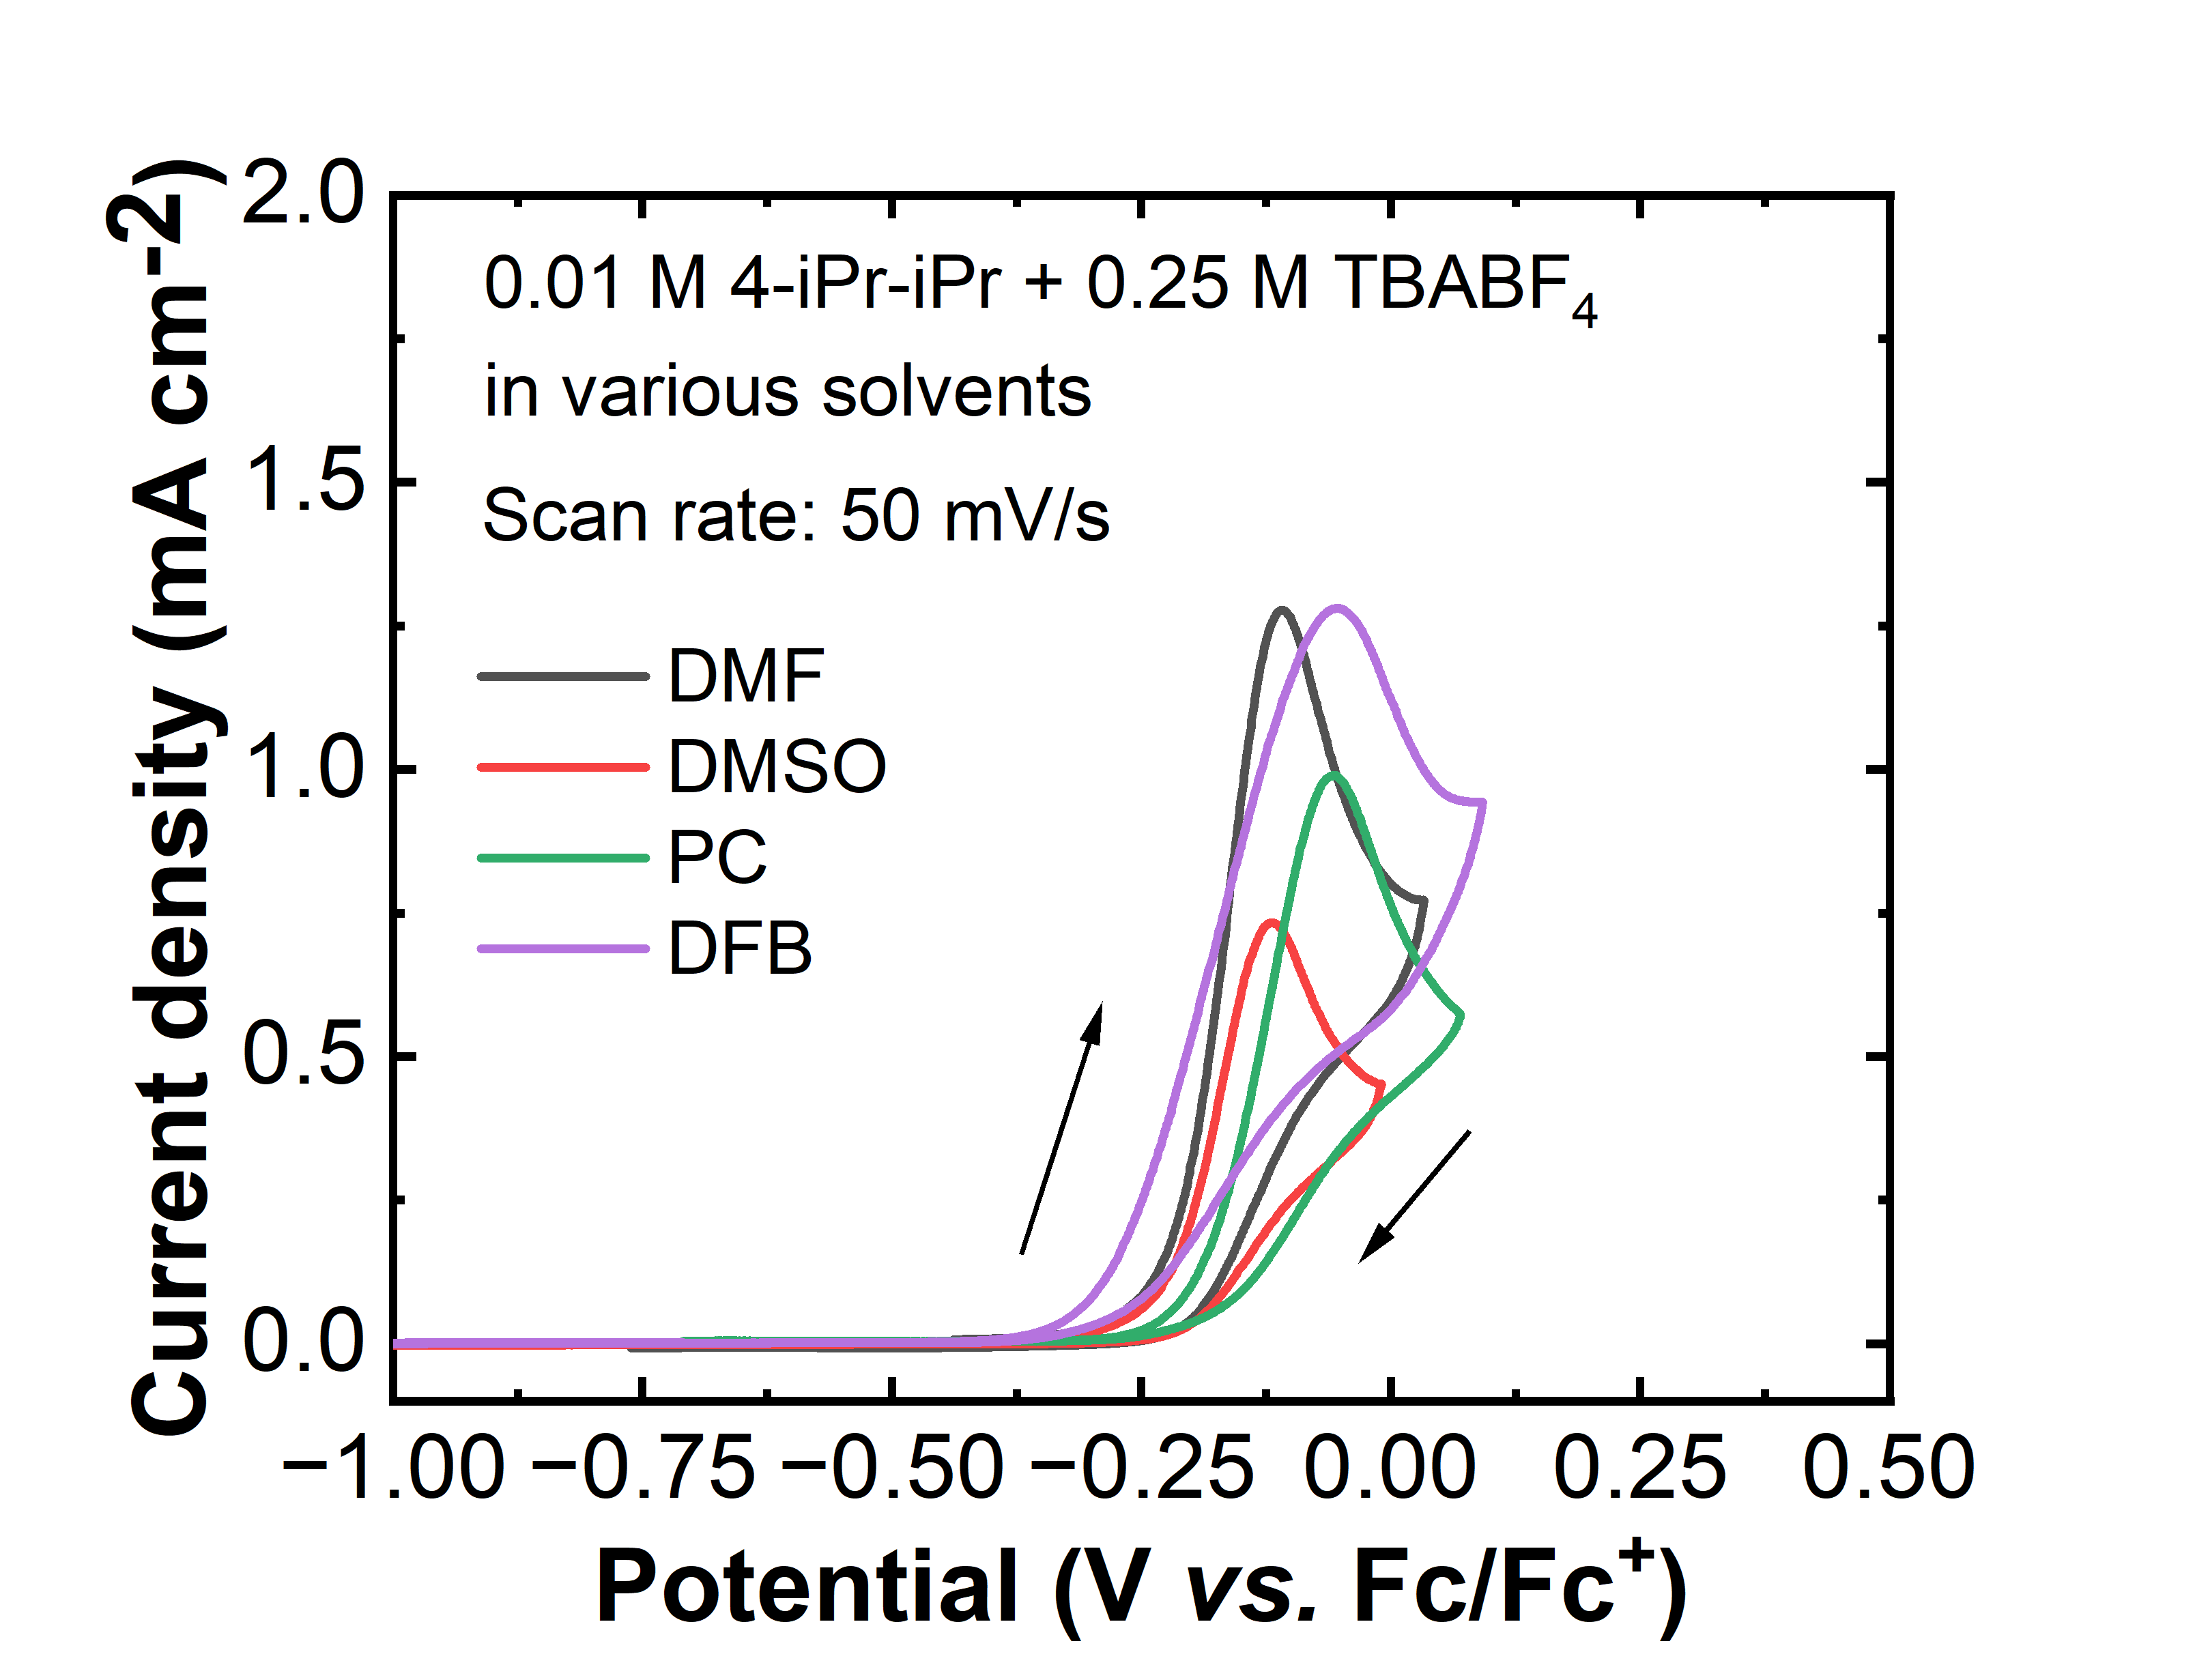


**Supplementary Fig. 45.** Cyclic voltammetry of **4-iPr-iPr** under Ar at a scan rate of 50 mV/s. The scan starts at OCV (-0.4 to -0.7 V *vs.* Fc/Fc+ depending on the solvent) and first scans positively. Working electrode: glassy carbon (GC), counter electrode: Pt, and reference electrode: Ag/Ag+. The electrolyte contains 0.01 M NHI + 0.25 M TBABF4 in DMF, DMSO, PC, and difluorobenzene (DFB). Ferrocene was used as an external standard to convert the potential of the reference electrode, and the conversion for each solvent is listed in **Supplementary Table. 1.**

**Supplementary Table. 1.** Reference potential conversion from Ag/Ag+ to Fc/Fc+ in various solvents

| Solvent | Potential conversion fromAg/Ag+ to Fc/Fc+ (V) |
| --- | --- |
| DMF | -0.06 |
| DMSO | -0.01 |
| PC | -0.03 |
| DFB | -0.21 |

*Speciation of oxidized NHI* ***6*** *under 100% CO2 condition:*

It is important to note that although the electrochemical product formed initially after oxidation of **6-nCO2** under 100% CO2 condition corresponds to an oxidation state of 2+ (green trace in Fig. 4b), a rapid disproportionation reaction would occur between **6-nCO2** and **62+** to form two **6+•** (with corresponding CO2 released from **6-nCO2**).6 This was also evidenced by the disappearance of the first reduction peak (**62+/6+•**) when scanning at a slower CV rate, indicating a complete spontaneous conversion of **62+** to **6+•** by disproportionation (**Supplementary Fig. 46**). Consequently, the **62+** species is short-lived in the presence of **6-nCO2**, thus each oxidized NHI undergoes a single electron transfer on average at the SOC range of 0 – 50% when accounting for the complete electrochemical and chemical pathways.

*
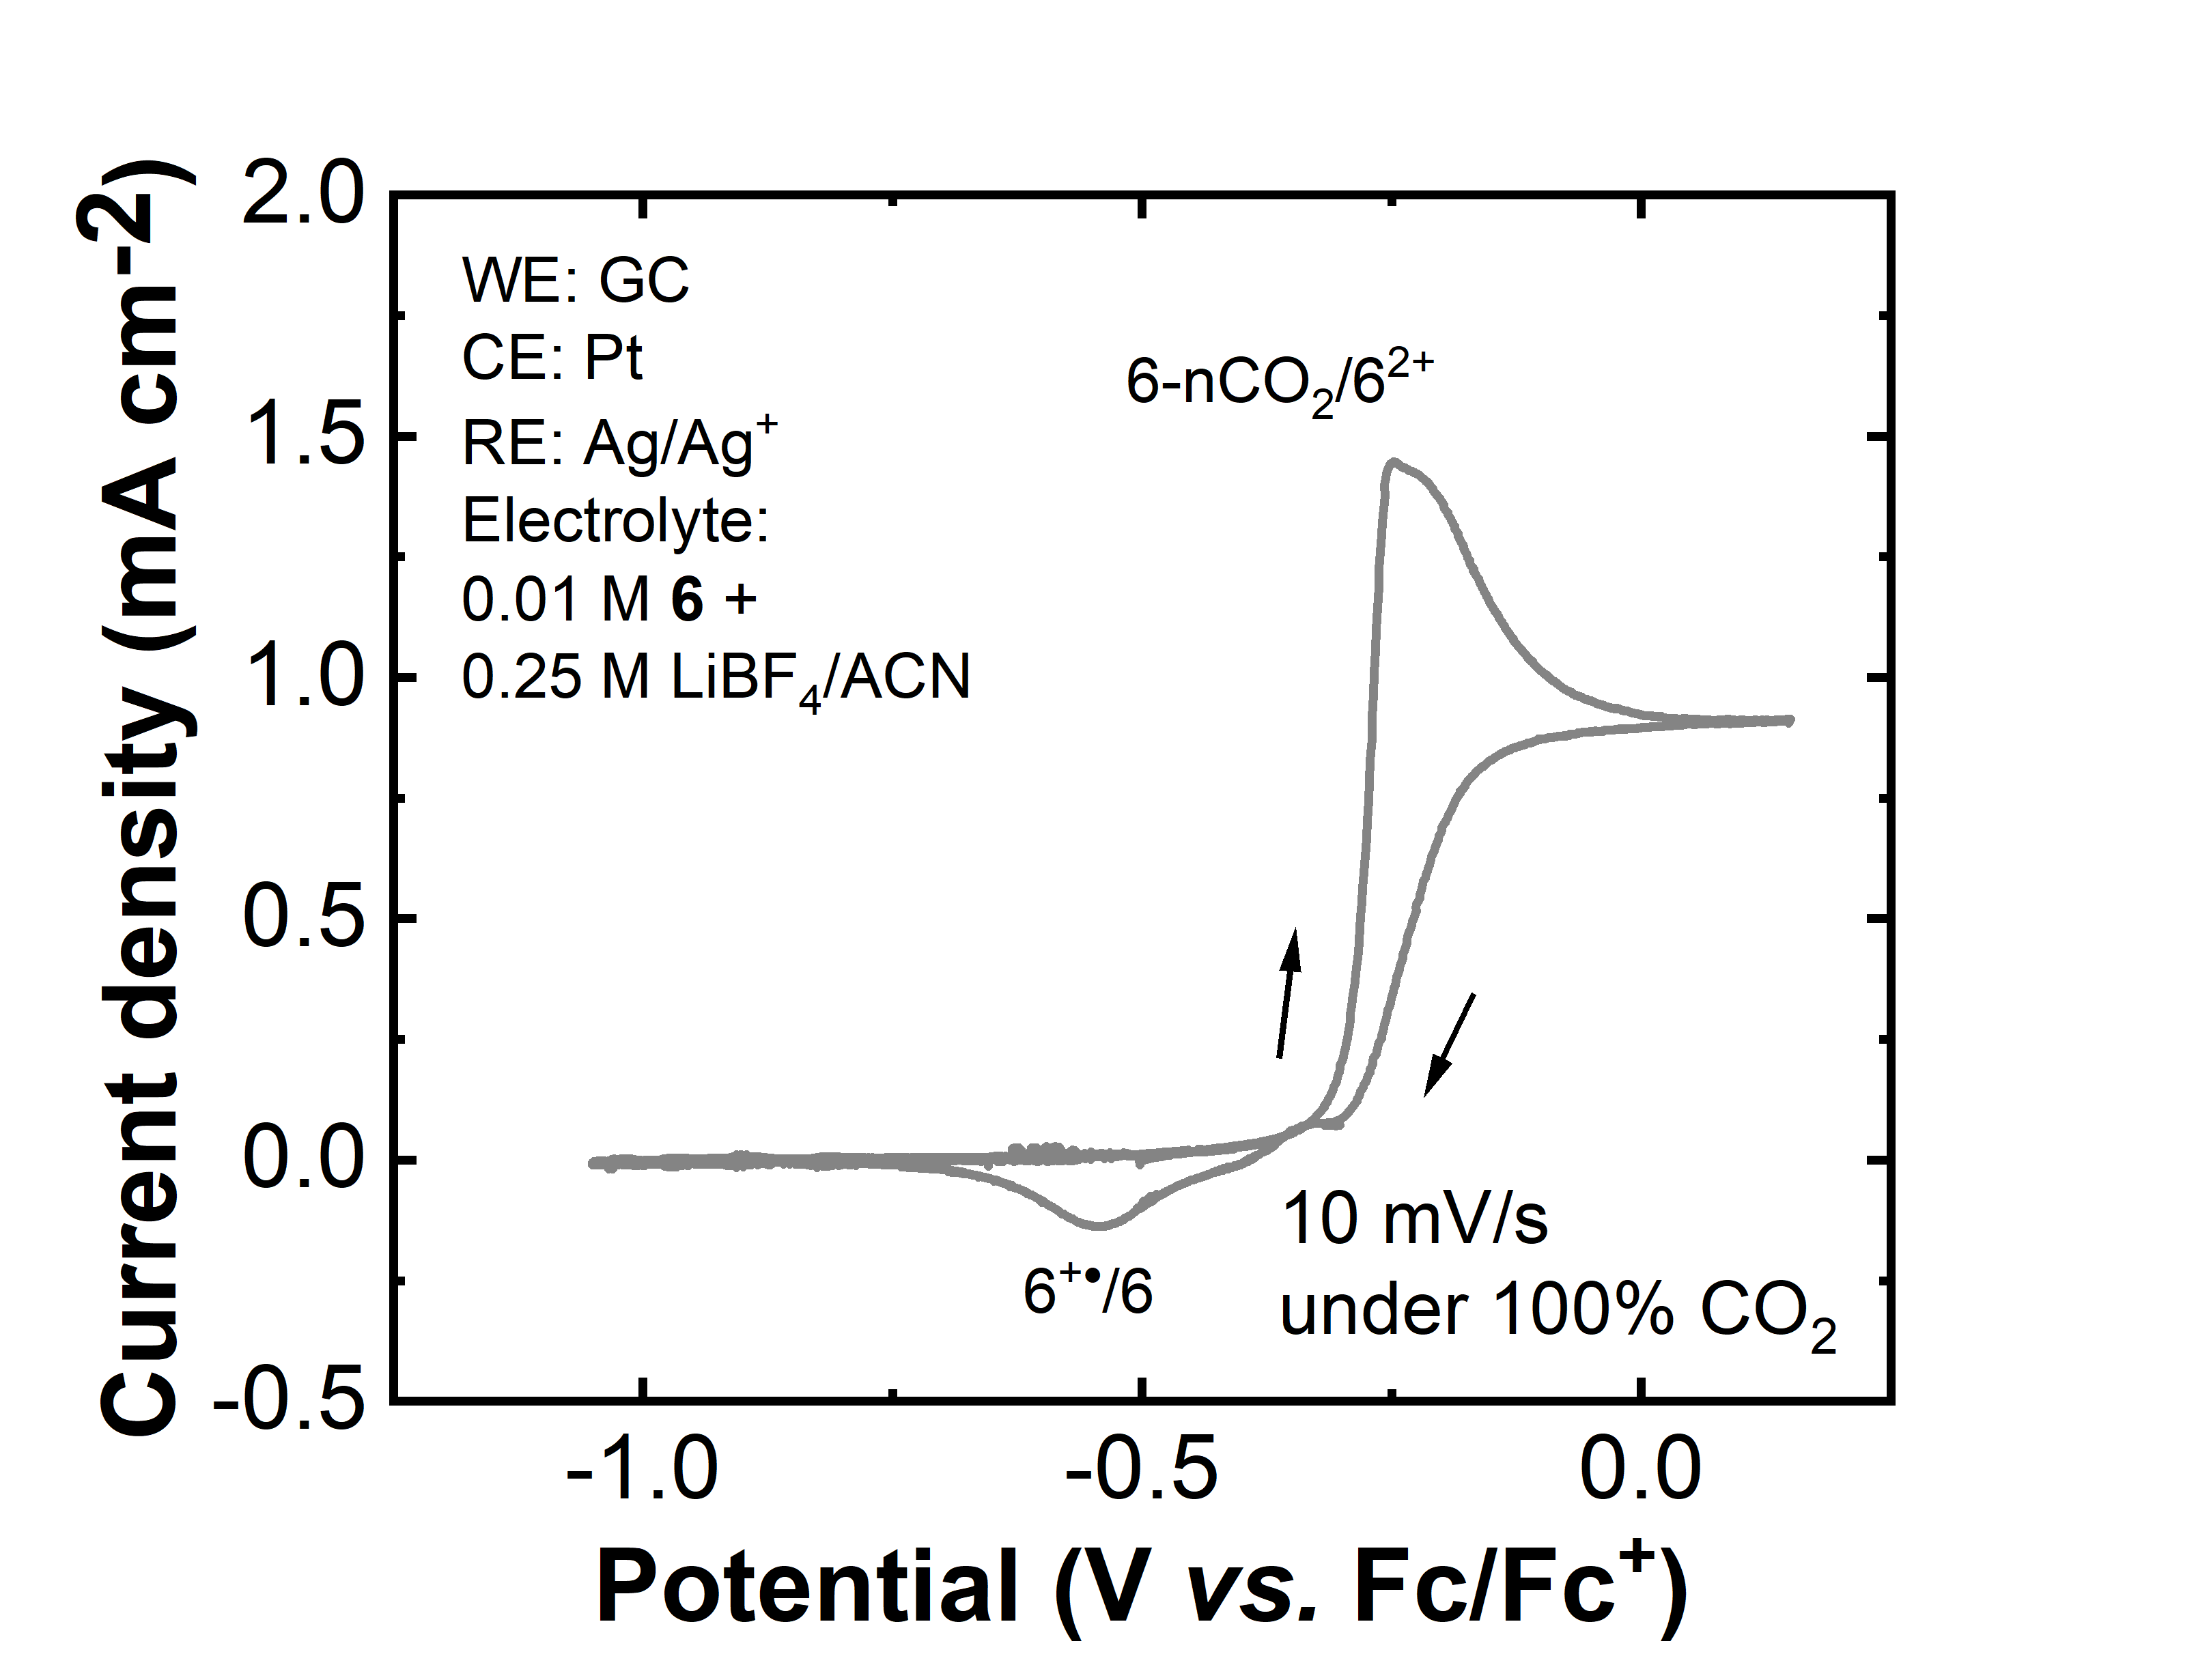
*

**Supplementary Fig. 46.** Cyclic voltammetry of **6** under 100% CO2 at 10 mV/s. The scan starts at OCV (-0.65 V *vs.* Fc/Fc+) and first scans positively. Working electrode: GC, counter electrode: Pt, and reference electrode: Ag/Ag+. Electrolyte contains 0.025 M **6** + 0.25 M LiBF4 in MeCN.

**
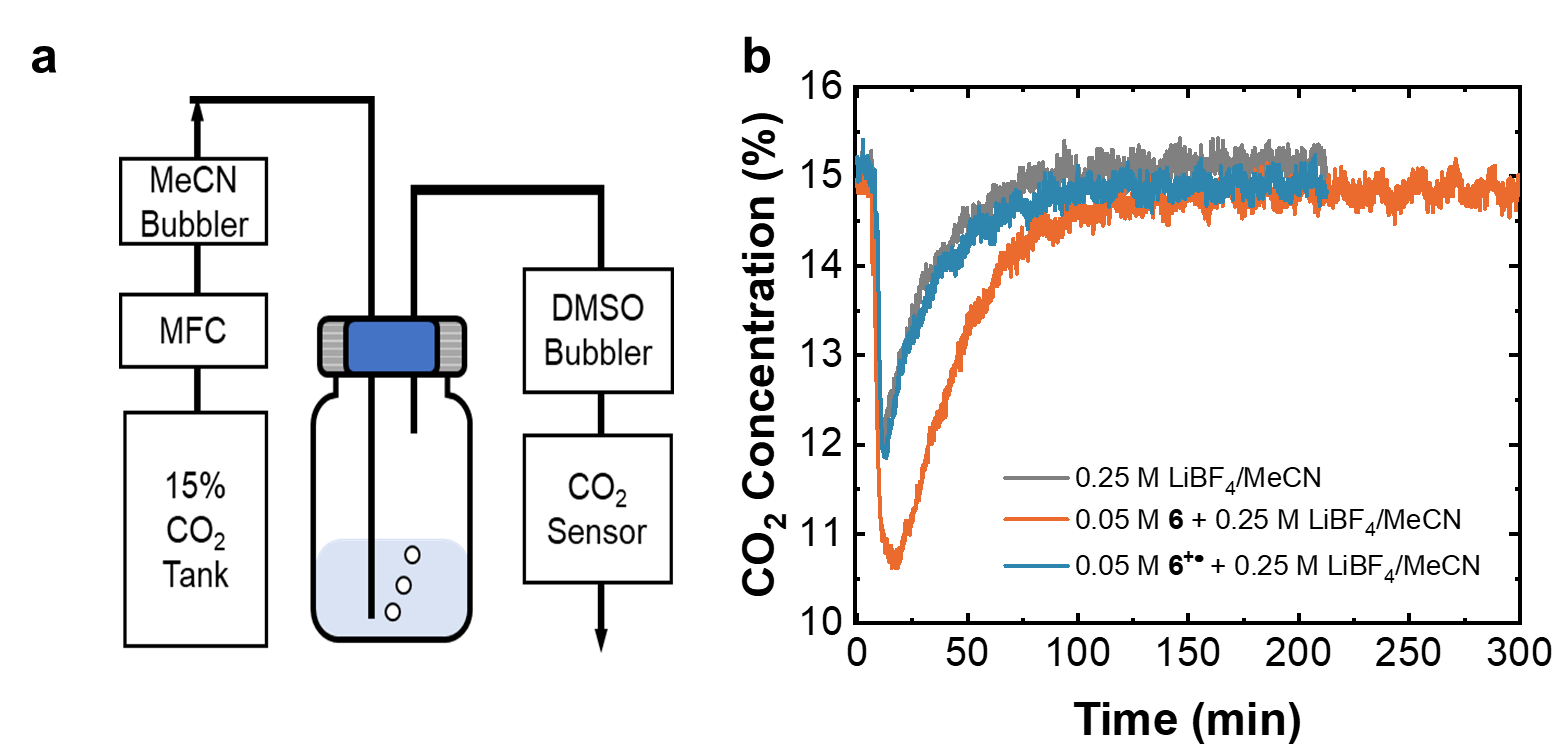
**

**Supplementary Fig. 47**. **a.** Experimental setup for measuring the CO2 loading on **6** under 15% CO2. Testing condition: 3 mL of sample purged with 5 sccm 15% CO2. Initial headspace: Ar. **b.** CO2 concentration versus time measured during CO2 capture for the 0.25 M LiBF4/MeCN (grey trace), 0.05 M **6** in 0.25 M LiBF4/MeCN (orange trace), and 0.05 M **6+•** in 0.25 M LiBF4/MeCN (blue trace).

**
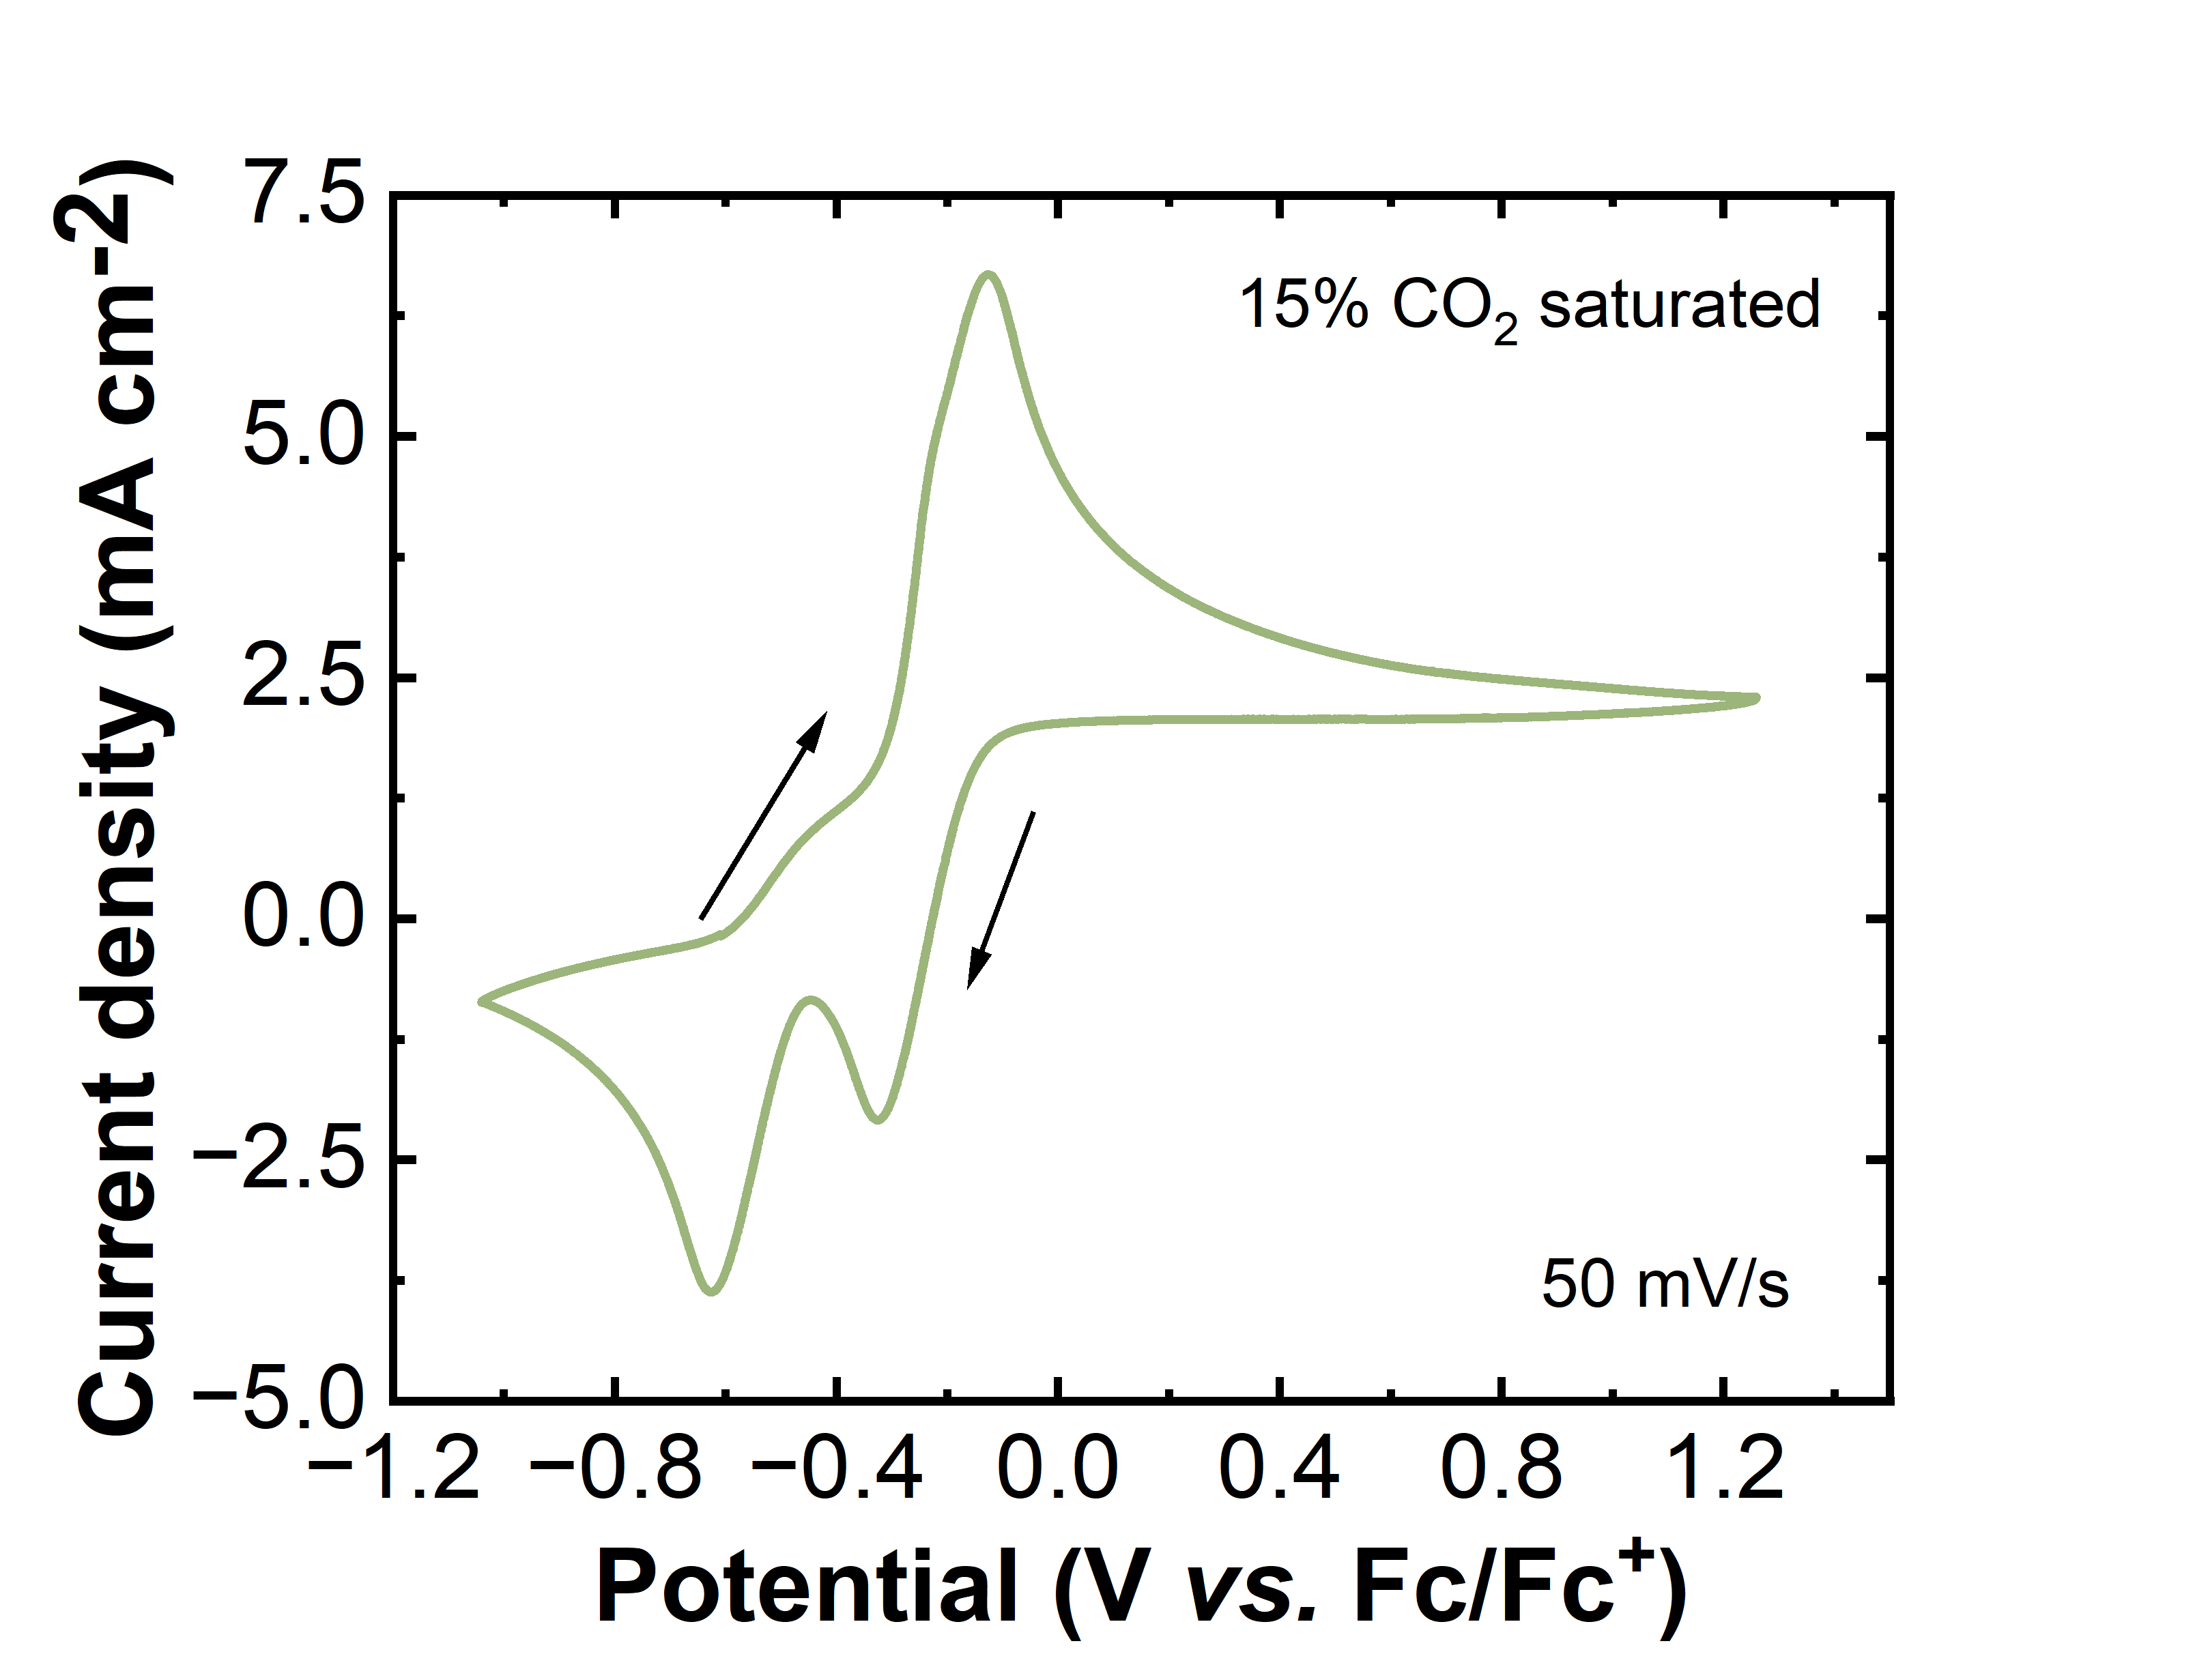
**

**Supplementary Fig. 48.** Cyclic voltammetry of **6** under 15% CO2 at 50 mV/s. The scan starts at OCV (-0.65 V *vs.* Fc/Fc+) and first scans positively. Working electrode: GC, counter electrode: Pt, and reference electrode: Ag/Ag+. Electrolyte contains 0.025 M **6** + 0.25 M LiBF4 in MeCN.

*CO2 loading of NHI* ***6****:*

Due to the fluctuation of the baseline signal from solution bubbling, the average values of dissolved CO2 after 20 minutes were reported. The result showed a dissolved CO2 of 0.775 and 0.926 mmol for 0.25 M LiBF4/MeCN and 0.025 M **6** in 0.25 M LiBF4/MeCN, respectively. This corresponds to a CO2 loading of 2.0 mol CO2/mol NHI for **6**, under µRC testing condition.


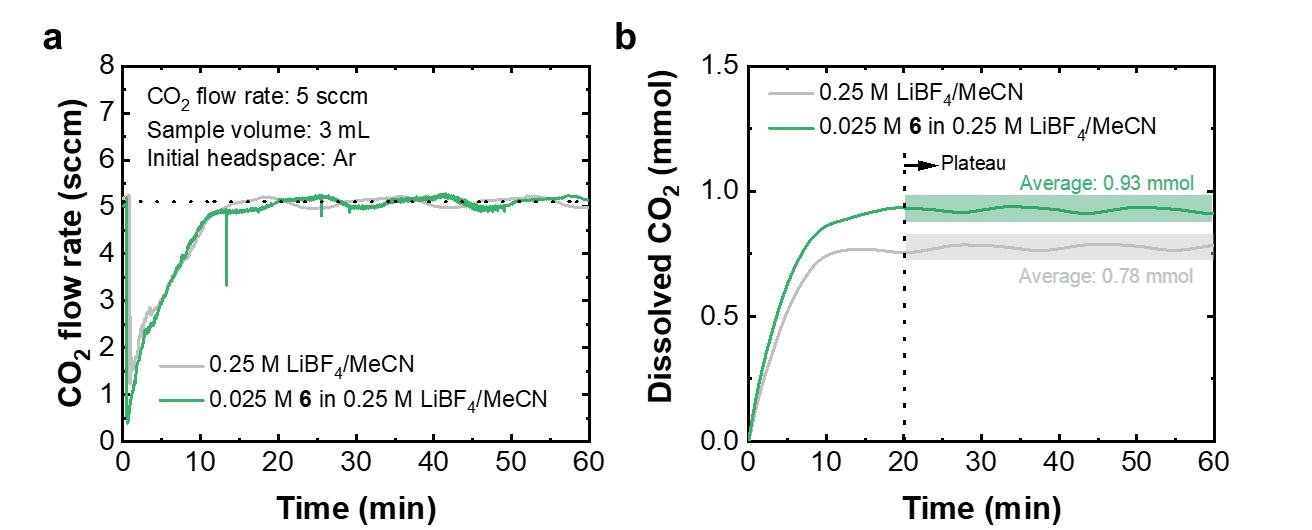


**Supplementary Fig. 49.** **a.** CO2 flow rate versus time during the measurements. Test conditions: 5 sccm of 100% CO2 purged to 3 mL of 0.25 M LiBF4/MeCN or 0.025 M **6** in 0.25 M LiBF4/MeCN. Initial headspace: Ar. **b.** Integrated amount of dissolved CO2 in the solution over time.


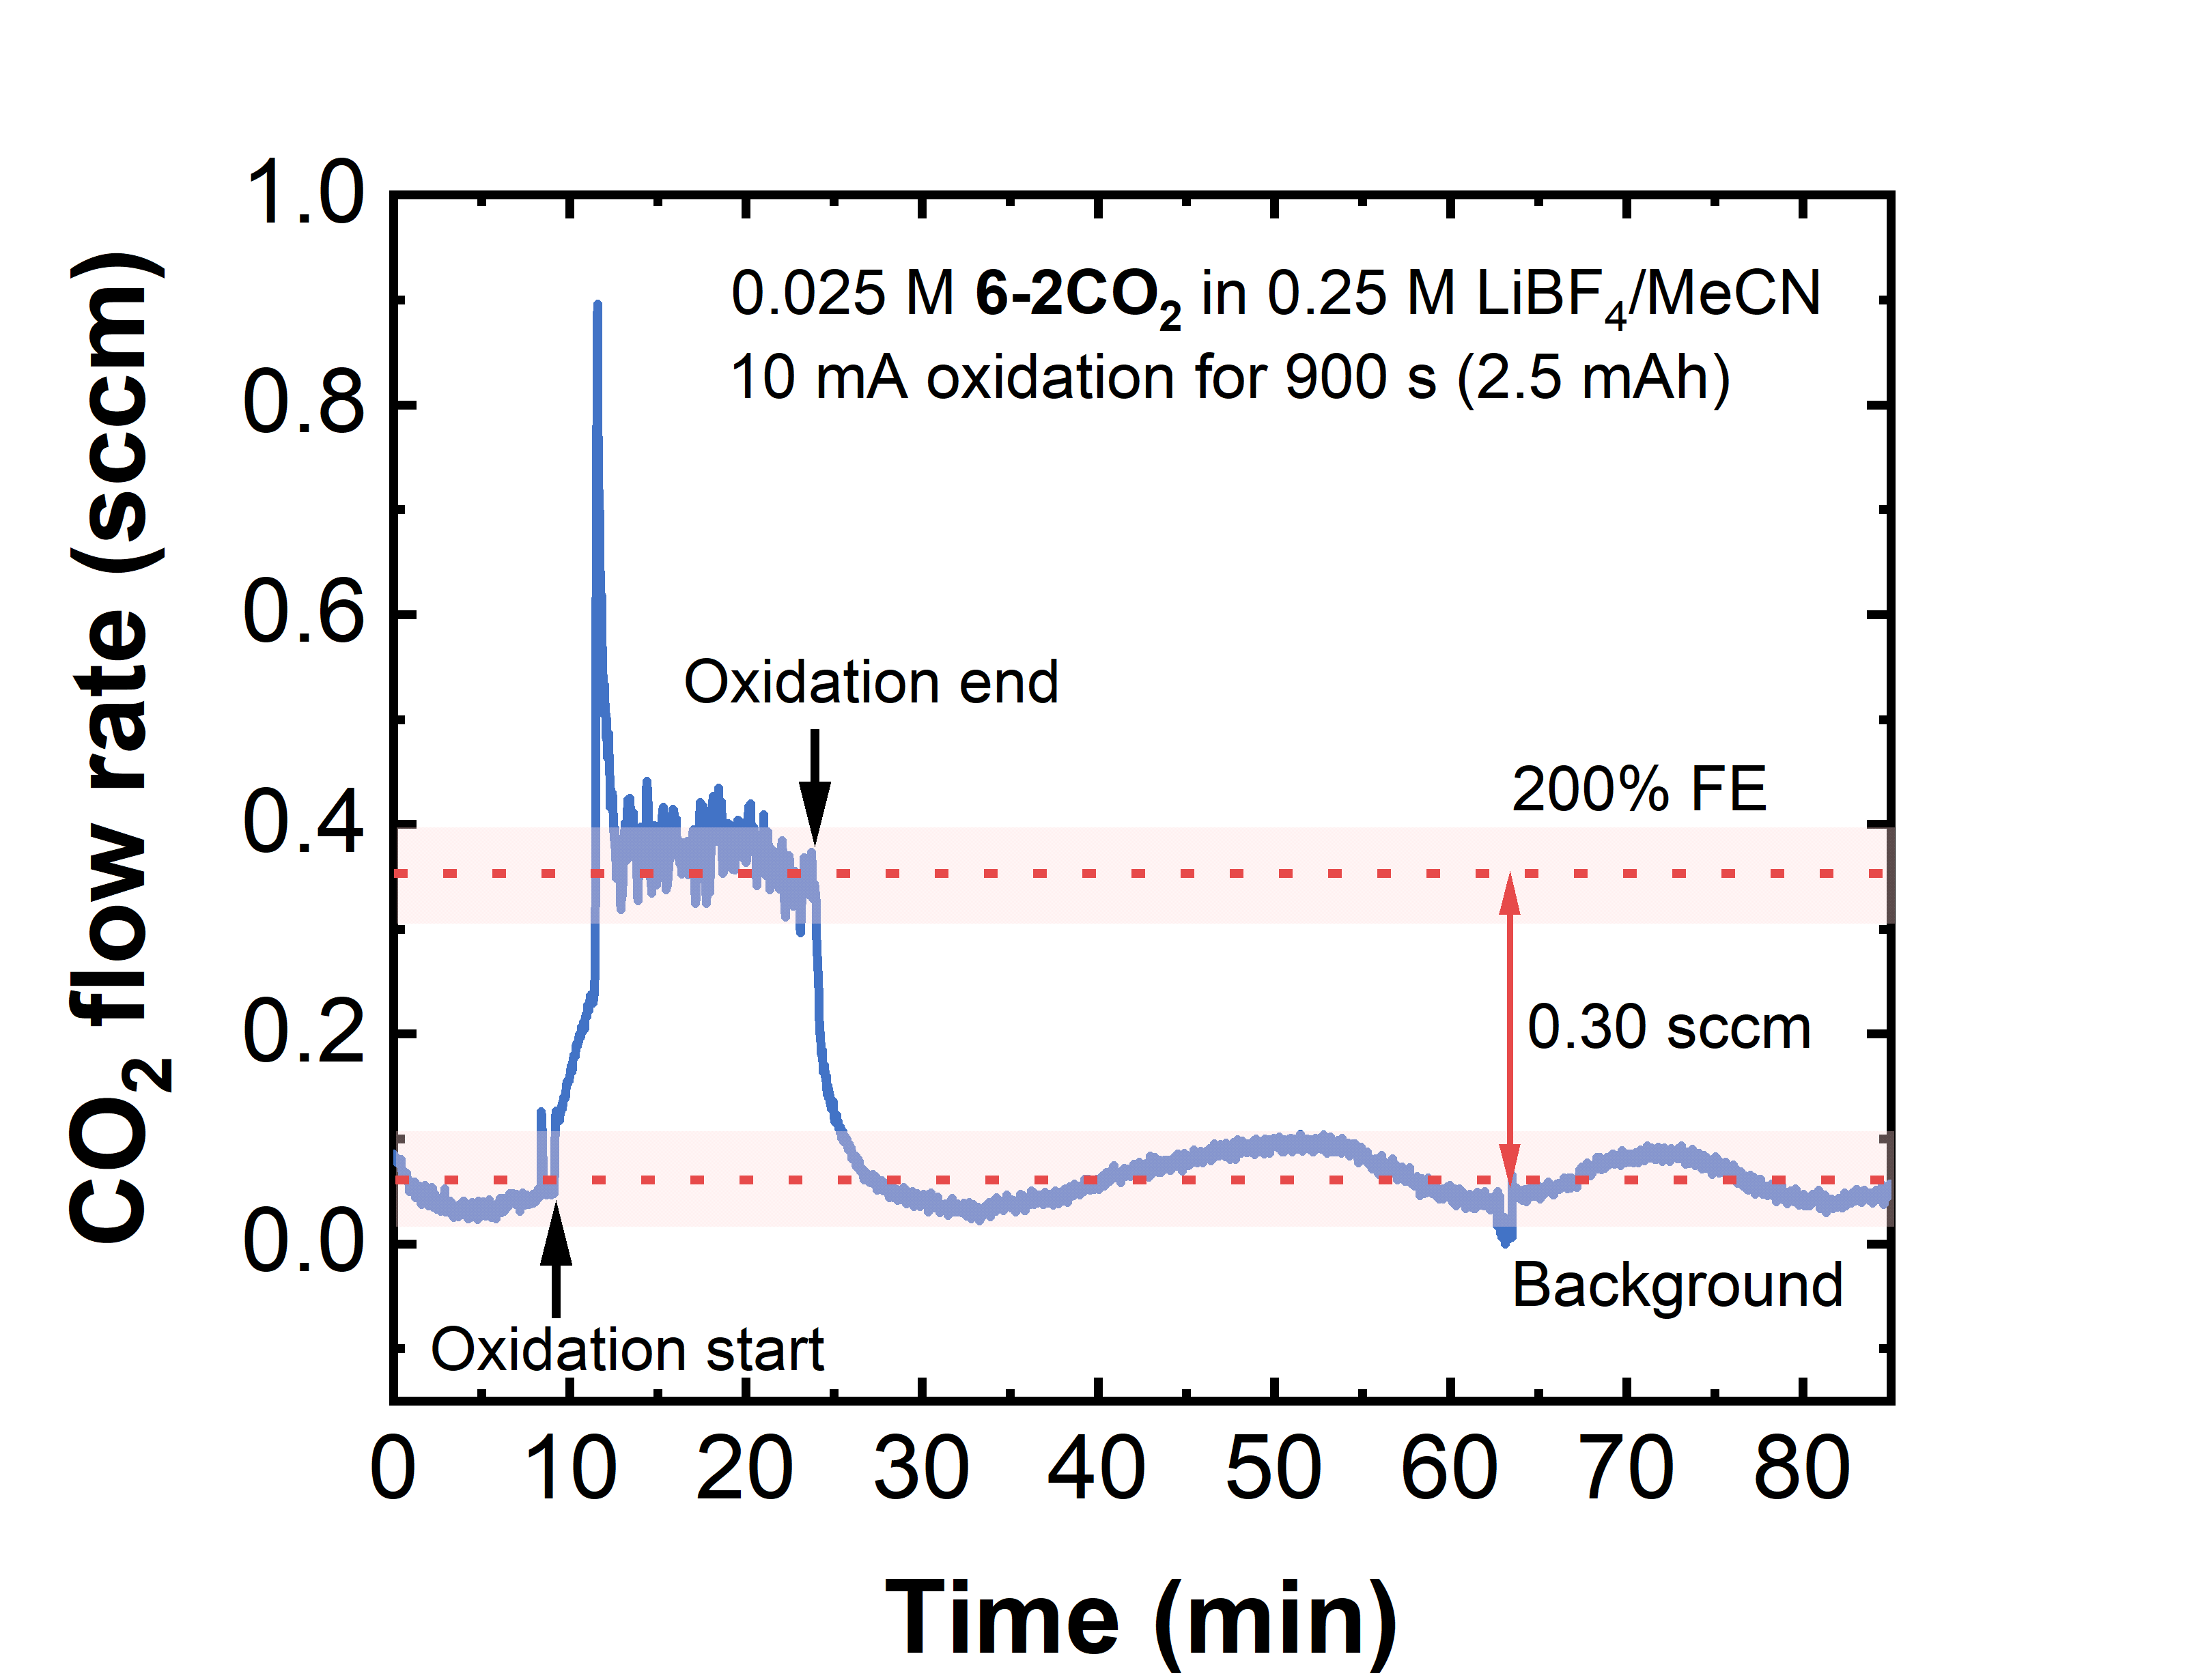


**Supplementary Fig. 50.** CO2 outlet flow rate as a function of time during the oxidation of **6-2CO2** under 100% CO2 atmosphere. A two-electrode H-cell contained 4 mL of **6** in 0.25 M LiBF4 in MeCN as the anolyte and 4.5 mL of 0.025 M **6⁺•** in 0.25 M LiBF4 in MeCN as the catholyte. Prior to oxidation, the anolyte was purged and saturated with 100% CO2 to fully convert **6** to **6-2CO2** (**Supplementary Fig. 49**). During electrolysis, the cell headspace was continuously purged with 0.1 sccm of 100% CO2, and a constant current of 10 mA was applied for 900 s (2.5 mAh or 47% SOC) at room temperature. The gas outlet was connected to a gas flow meter to monitor CO2 release. Both working and counter electrodes were carbon paper.

**
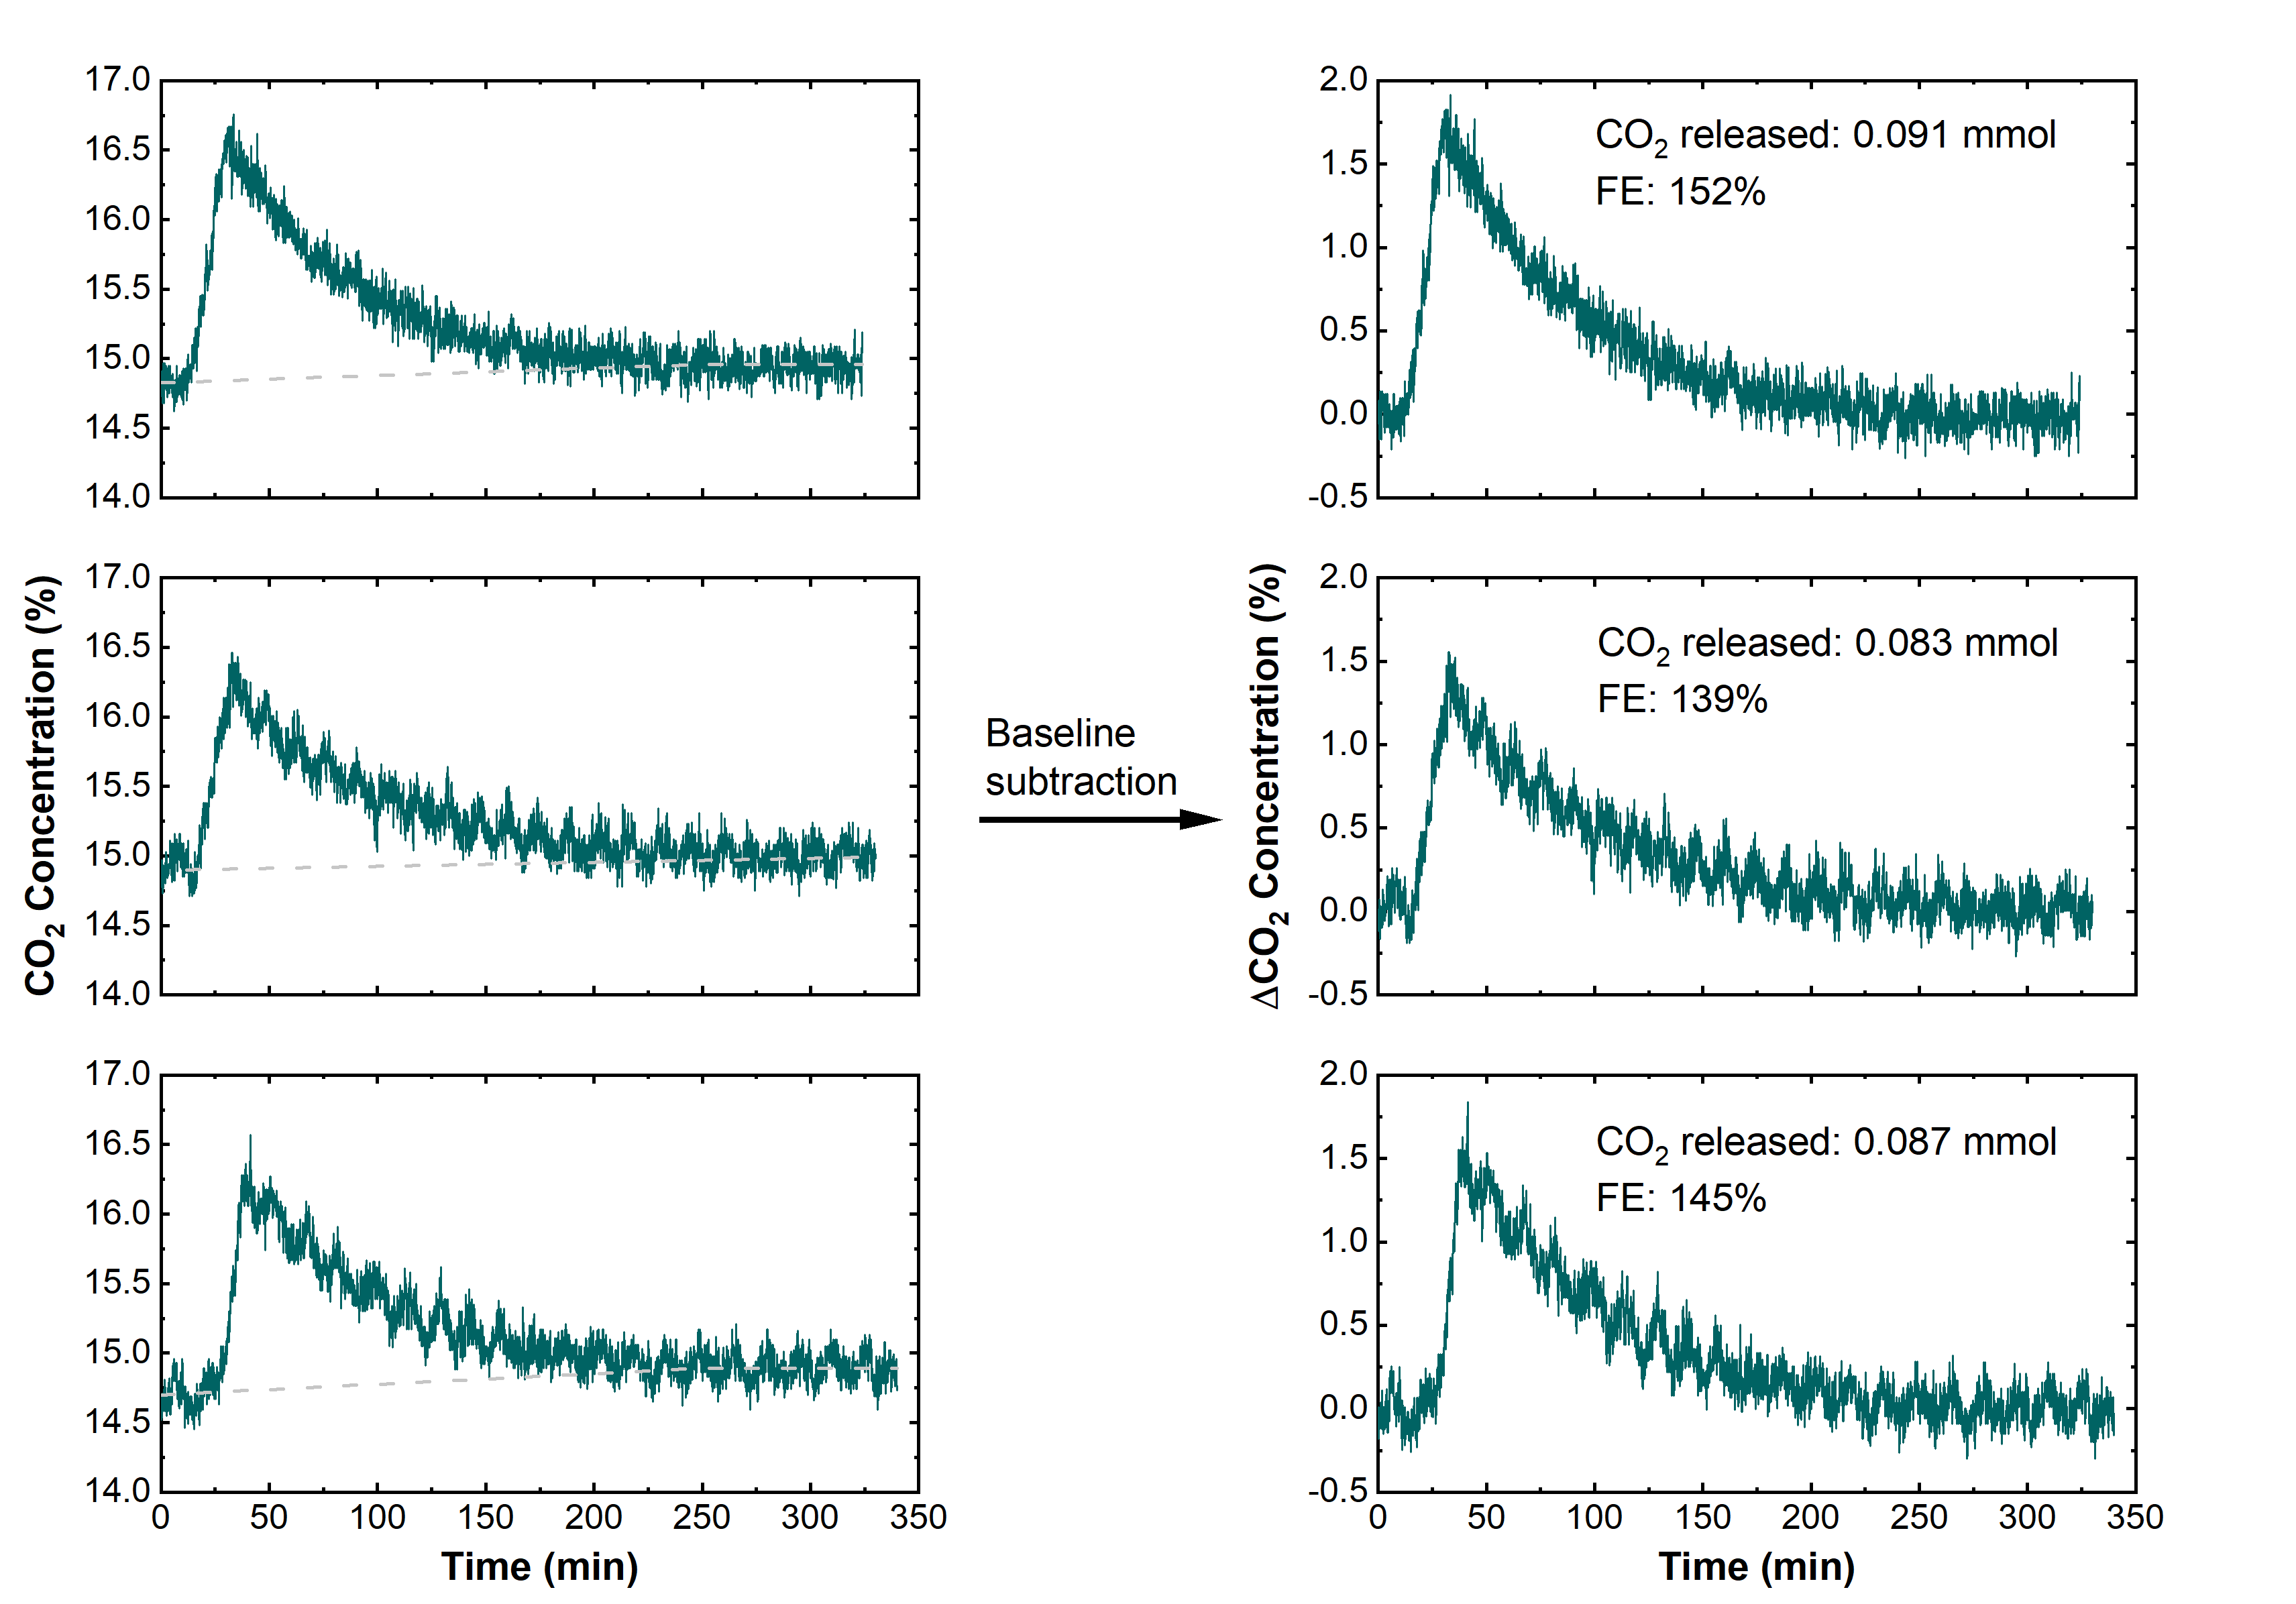
**

**Supplementary Fig. 51.** CO2 concentration changes during a SOC swing of 10% to 25% for 4 mL of 0.05 M **6** under 15% CO2. The oxidation is conducted at 7.5 mA for 772 s and the system rests for 5 h for the CO2 concentration to go back to baseline.

**
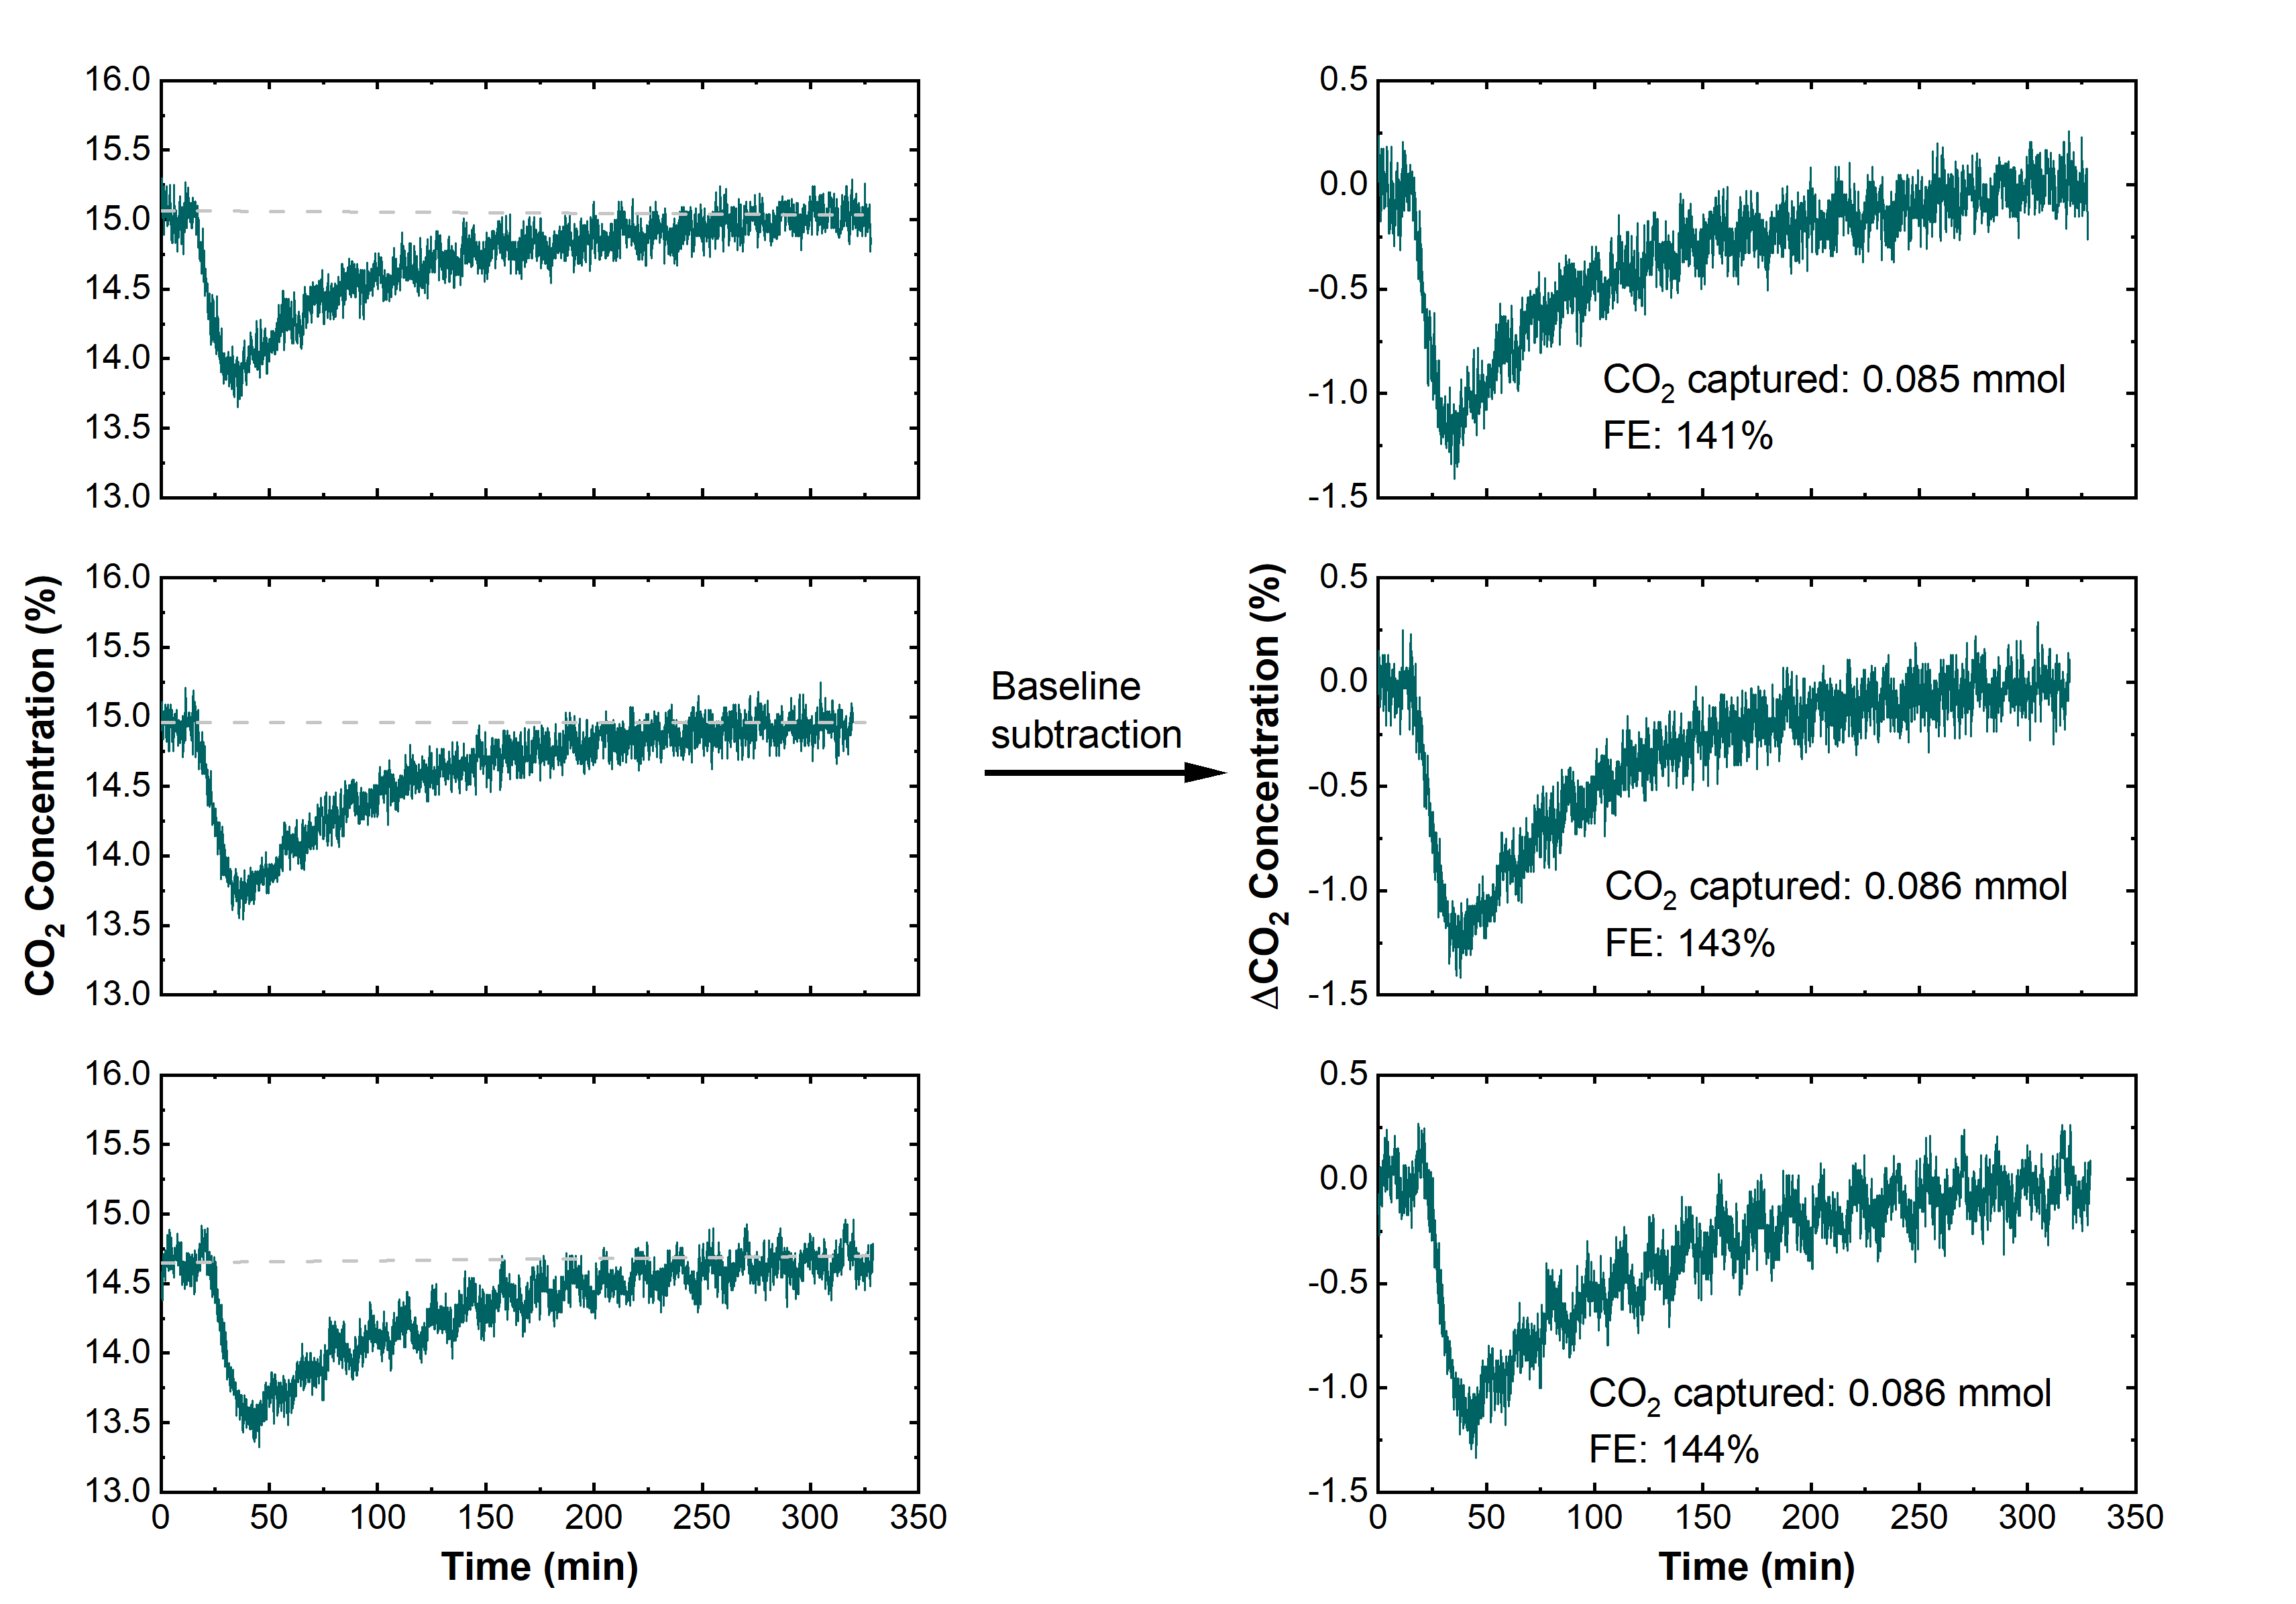
**

**Supplementary Fig. 52.** CO2 concentration changes during SOC swing of 25% to 10% for 4 mL of 0.05 M **6** under 15% CO2. The reduction is conducted at 7.5 mA for 772 s and the system rests for 5 h for the CO2 concentration to go back to baseline.

**
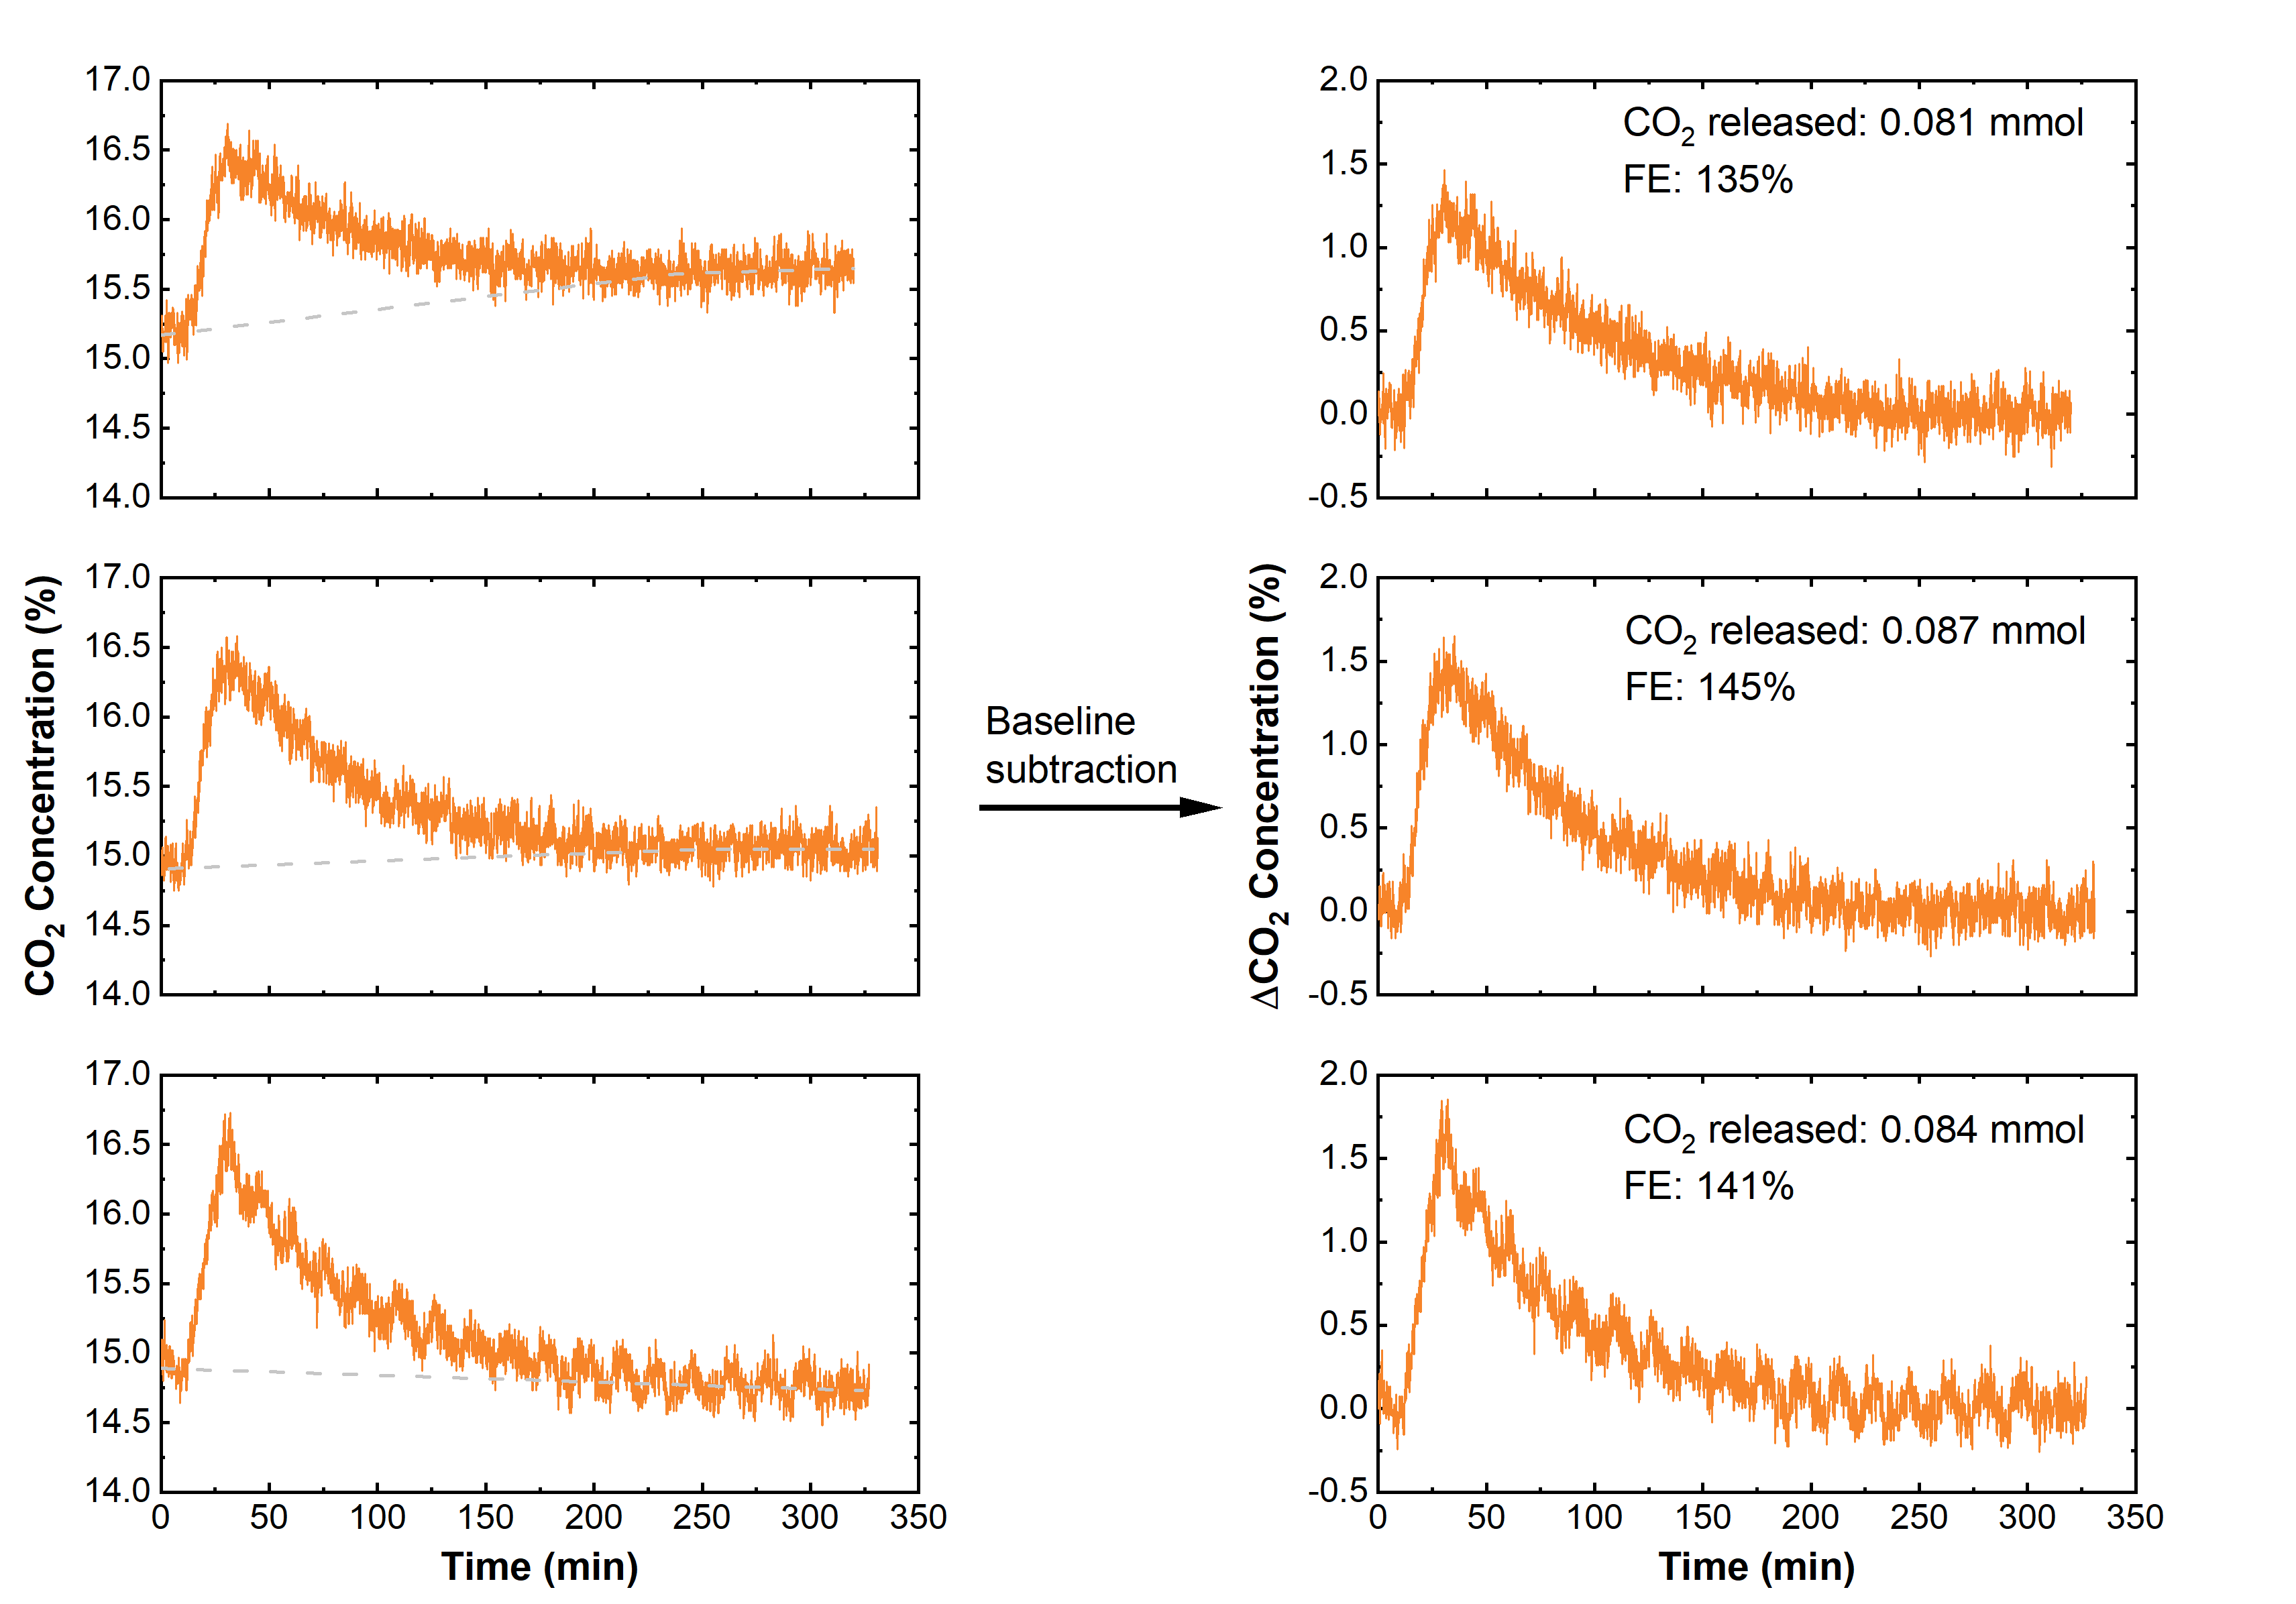
**

**Supplementary Fig. 53.** CO2 concentration changes during the SOC swing of 25% to 40% for 4 mL of 0.05 M **6** under 15% CO2. The oxidation is conducted at 7.5 mA for 772 s and the system rests for 5 h for the CO2 concentration to go back to baseline.

**
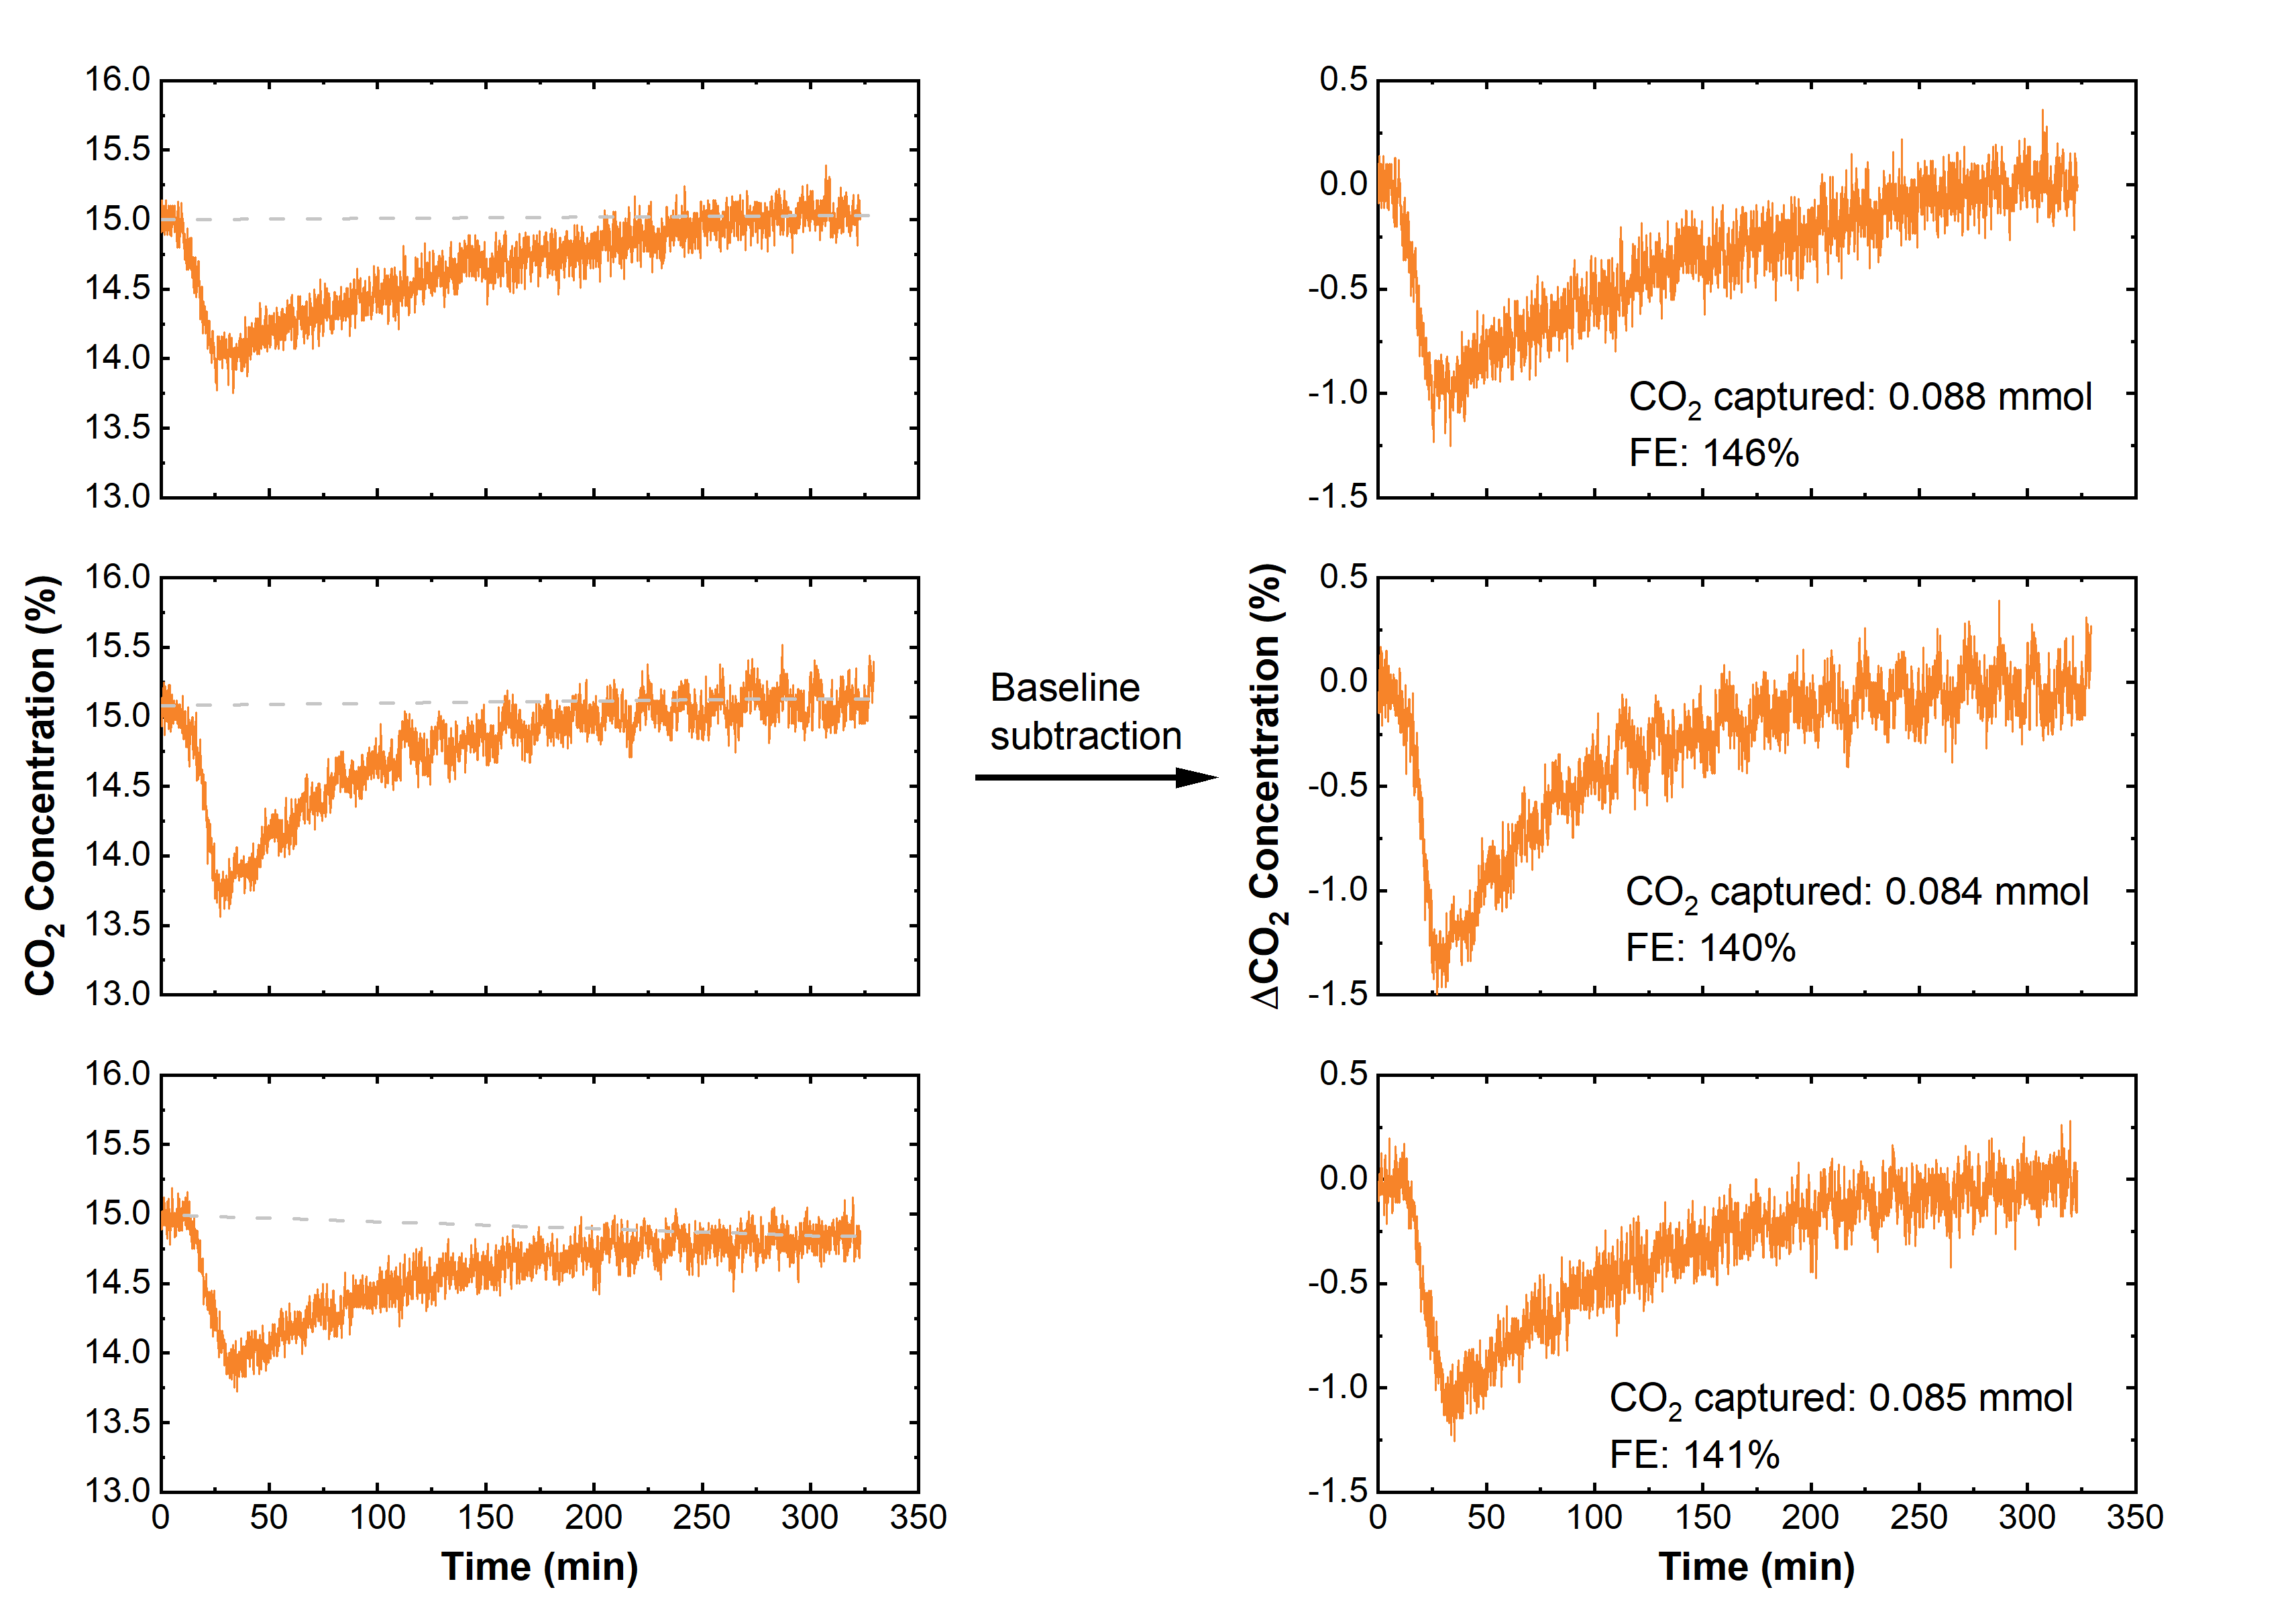
**

**Supplementary Fig. 54.** CO2 concentration changes during the SOC swing of 40% to 25% for 4 mL of 0.05 M **6** under 15% CO2. The reduction is conducted at 7.5 mA for 772 s and the system rests for 5 h for the CO2 concentration to go back to baseline.

**
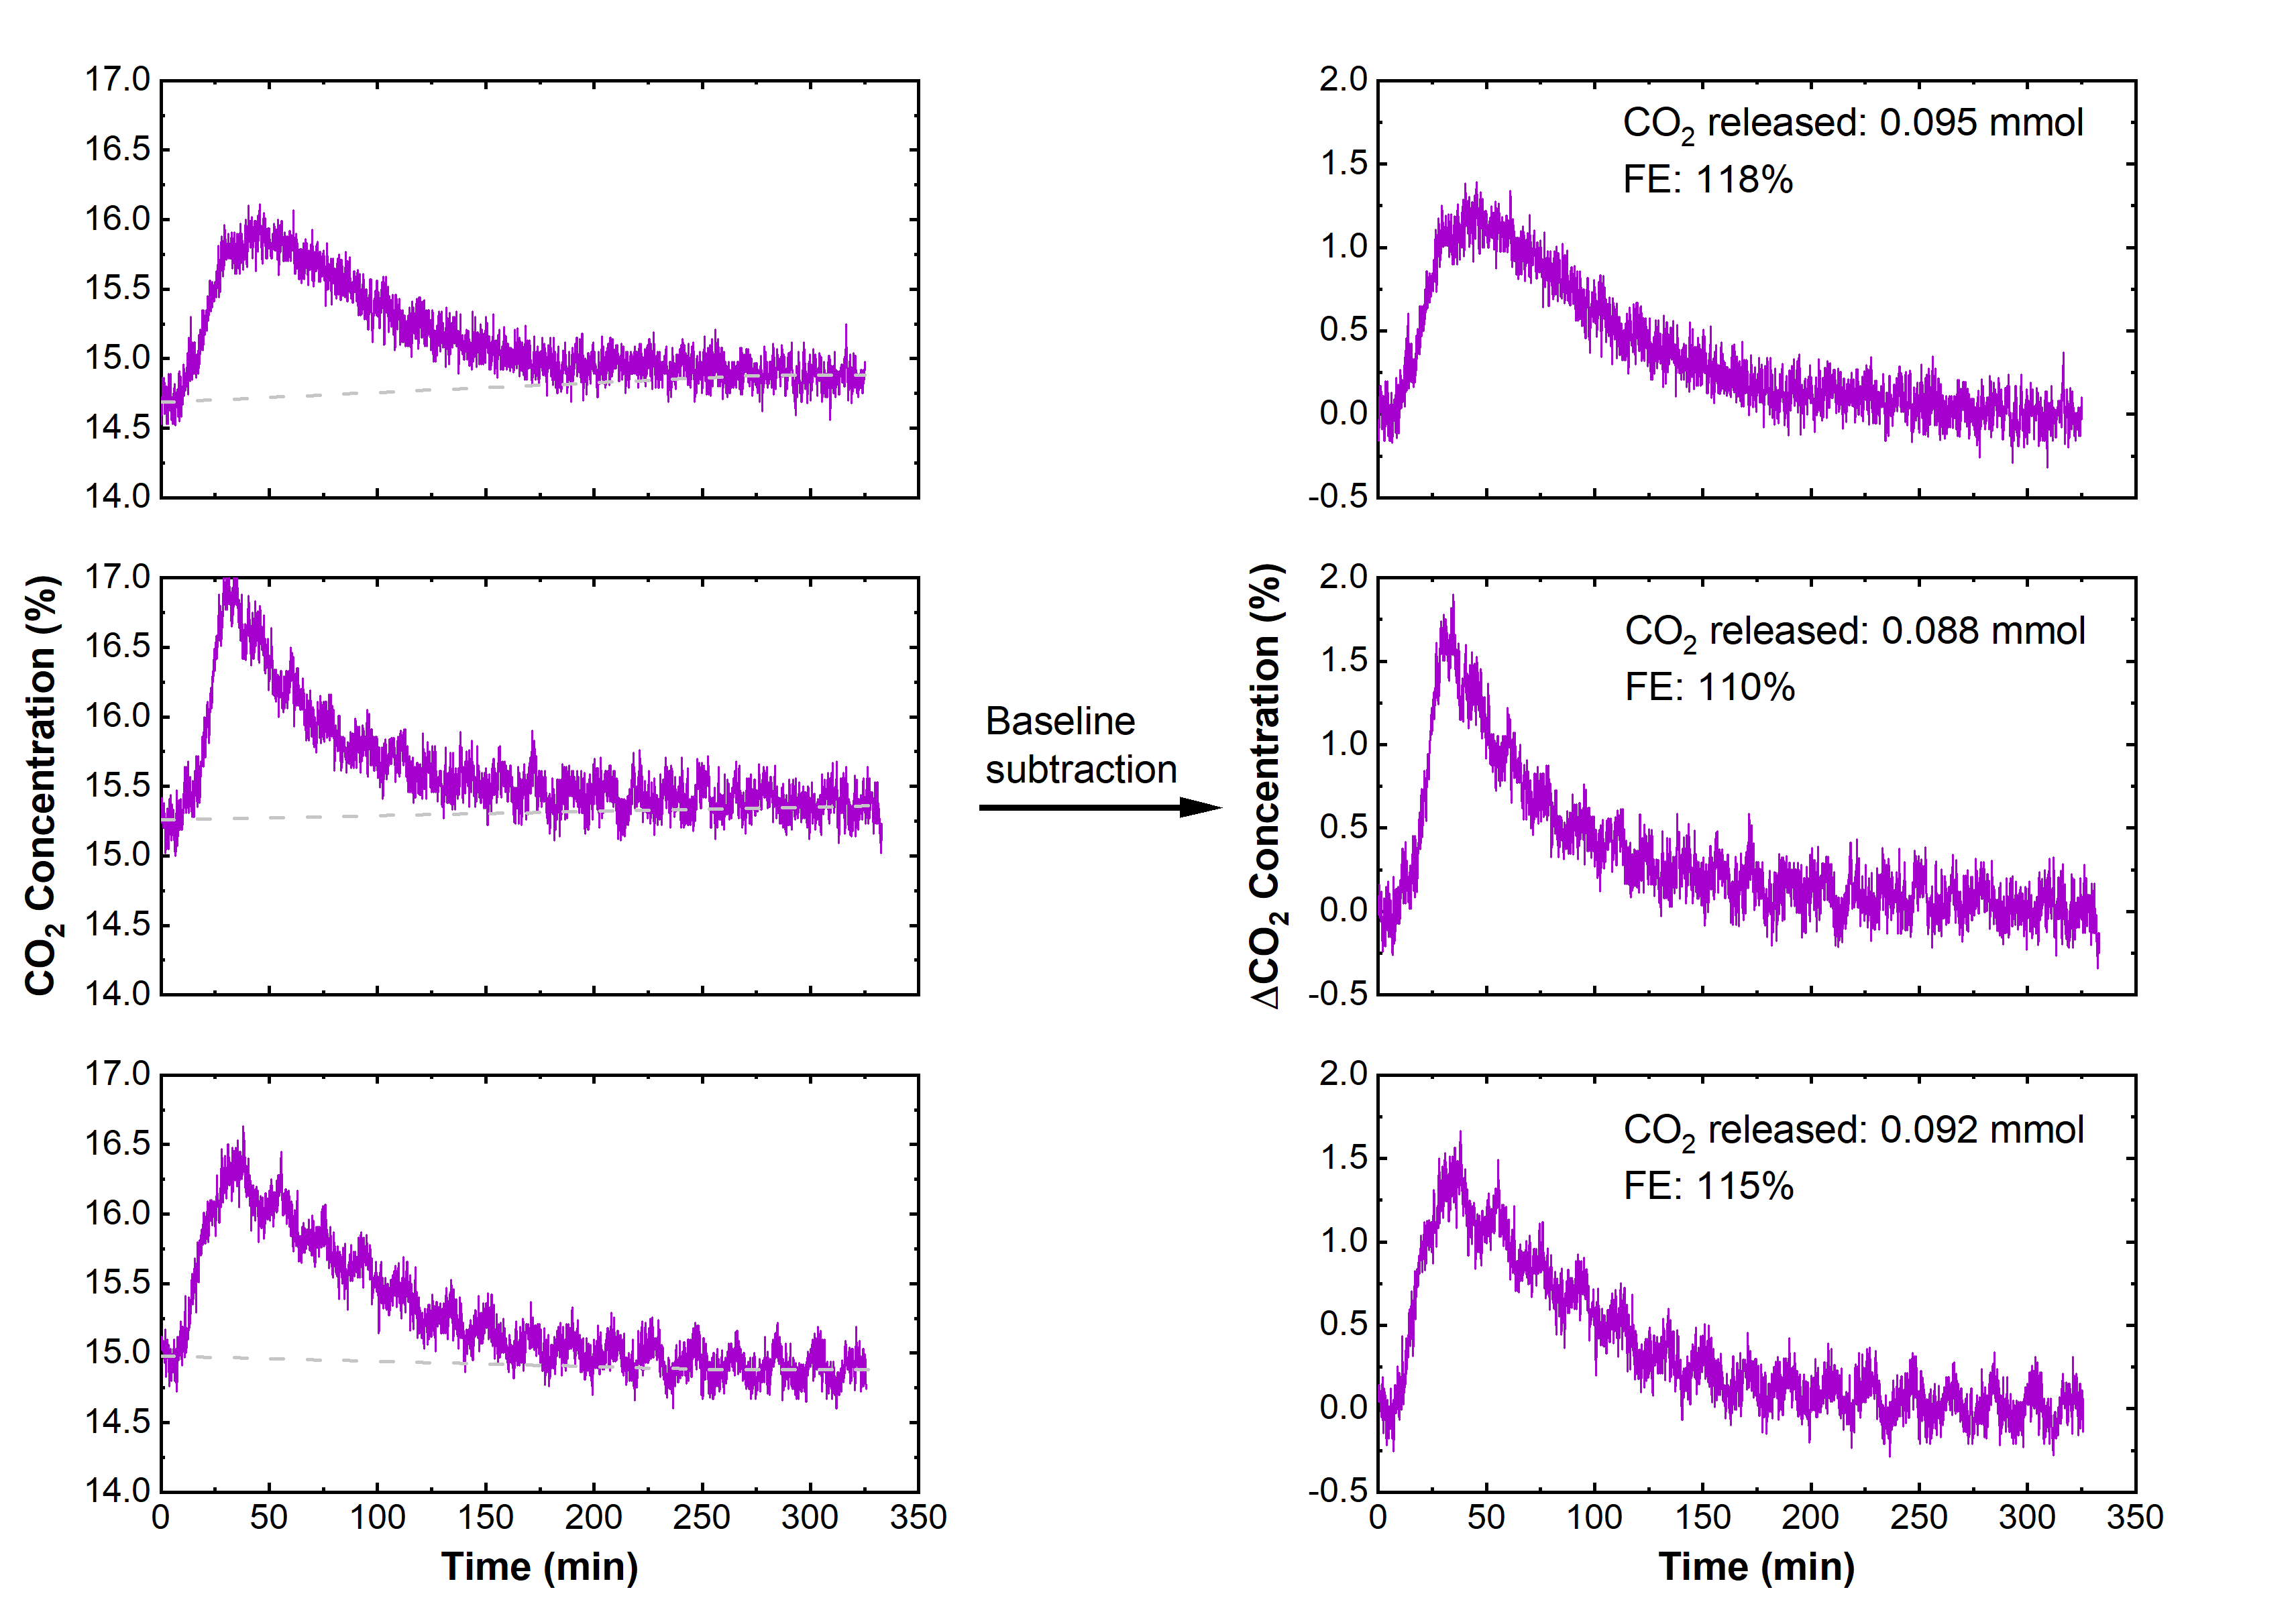
**

**Supplementary Fig. 55.** CO2 concentration changes during the SOC swing of 30% to 50% for 4 mL of 0.05 M **6** under 15% CO2. The oxidation is conducted at 7.5 mA for 1029 s and the system rests for 5 h for the CO2 concentration to go back to baseline.

**
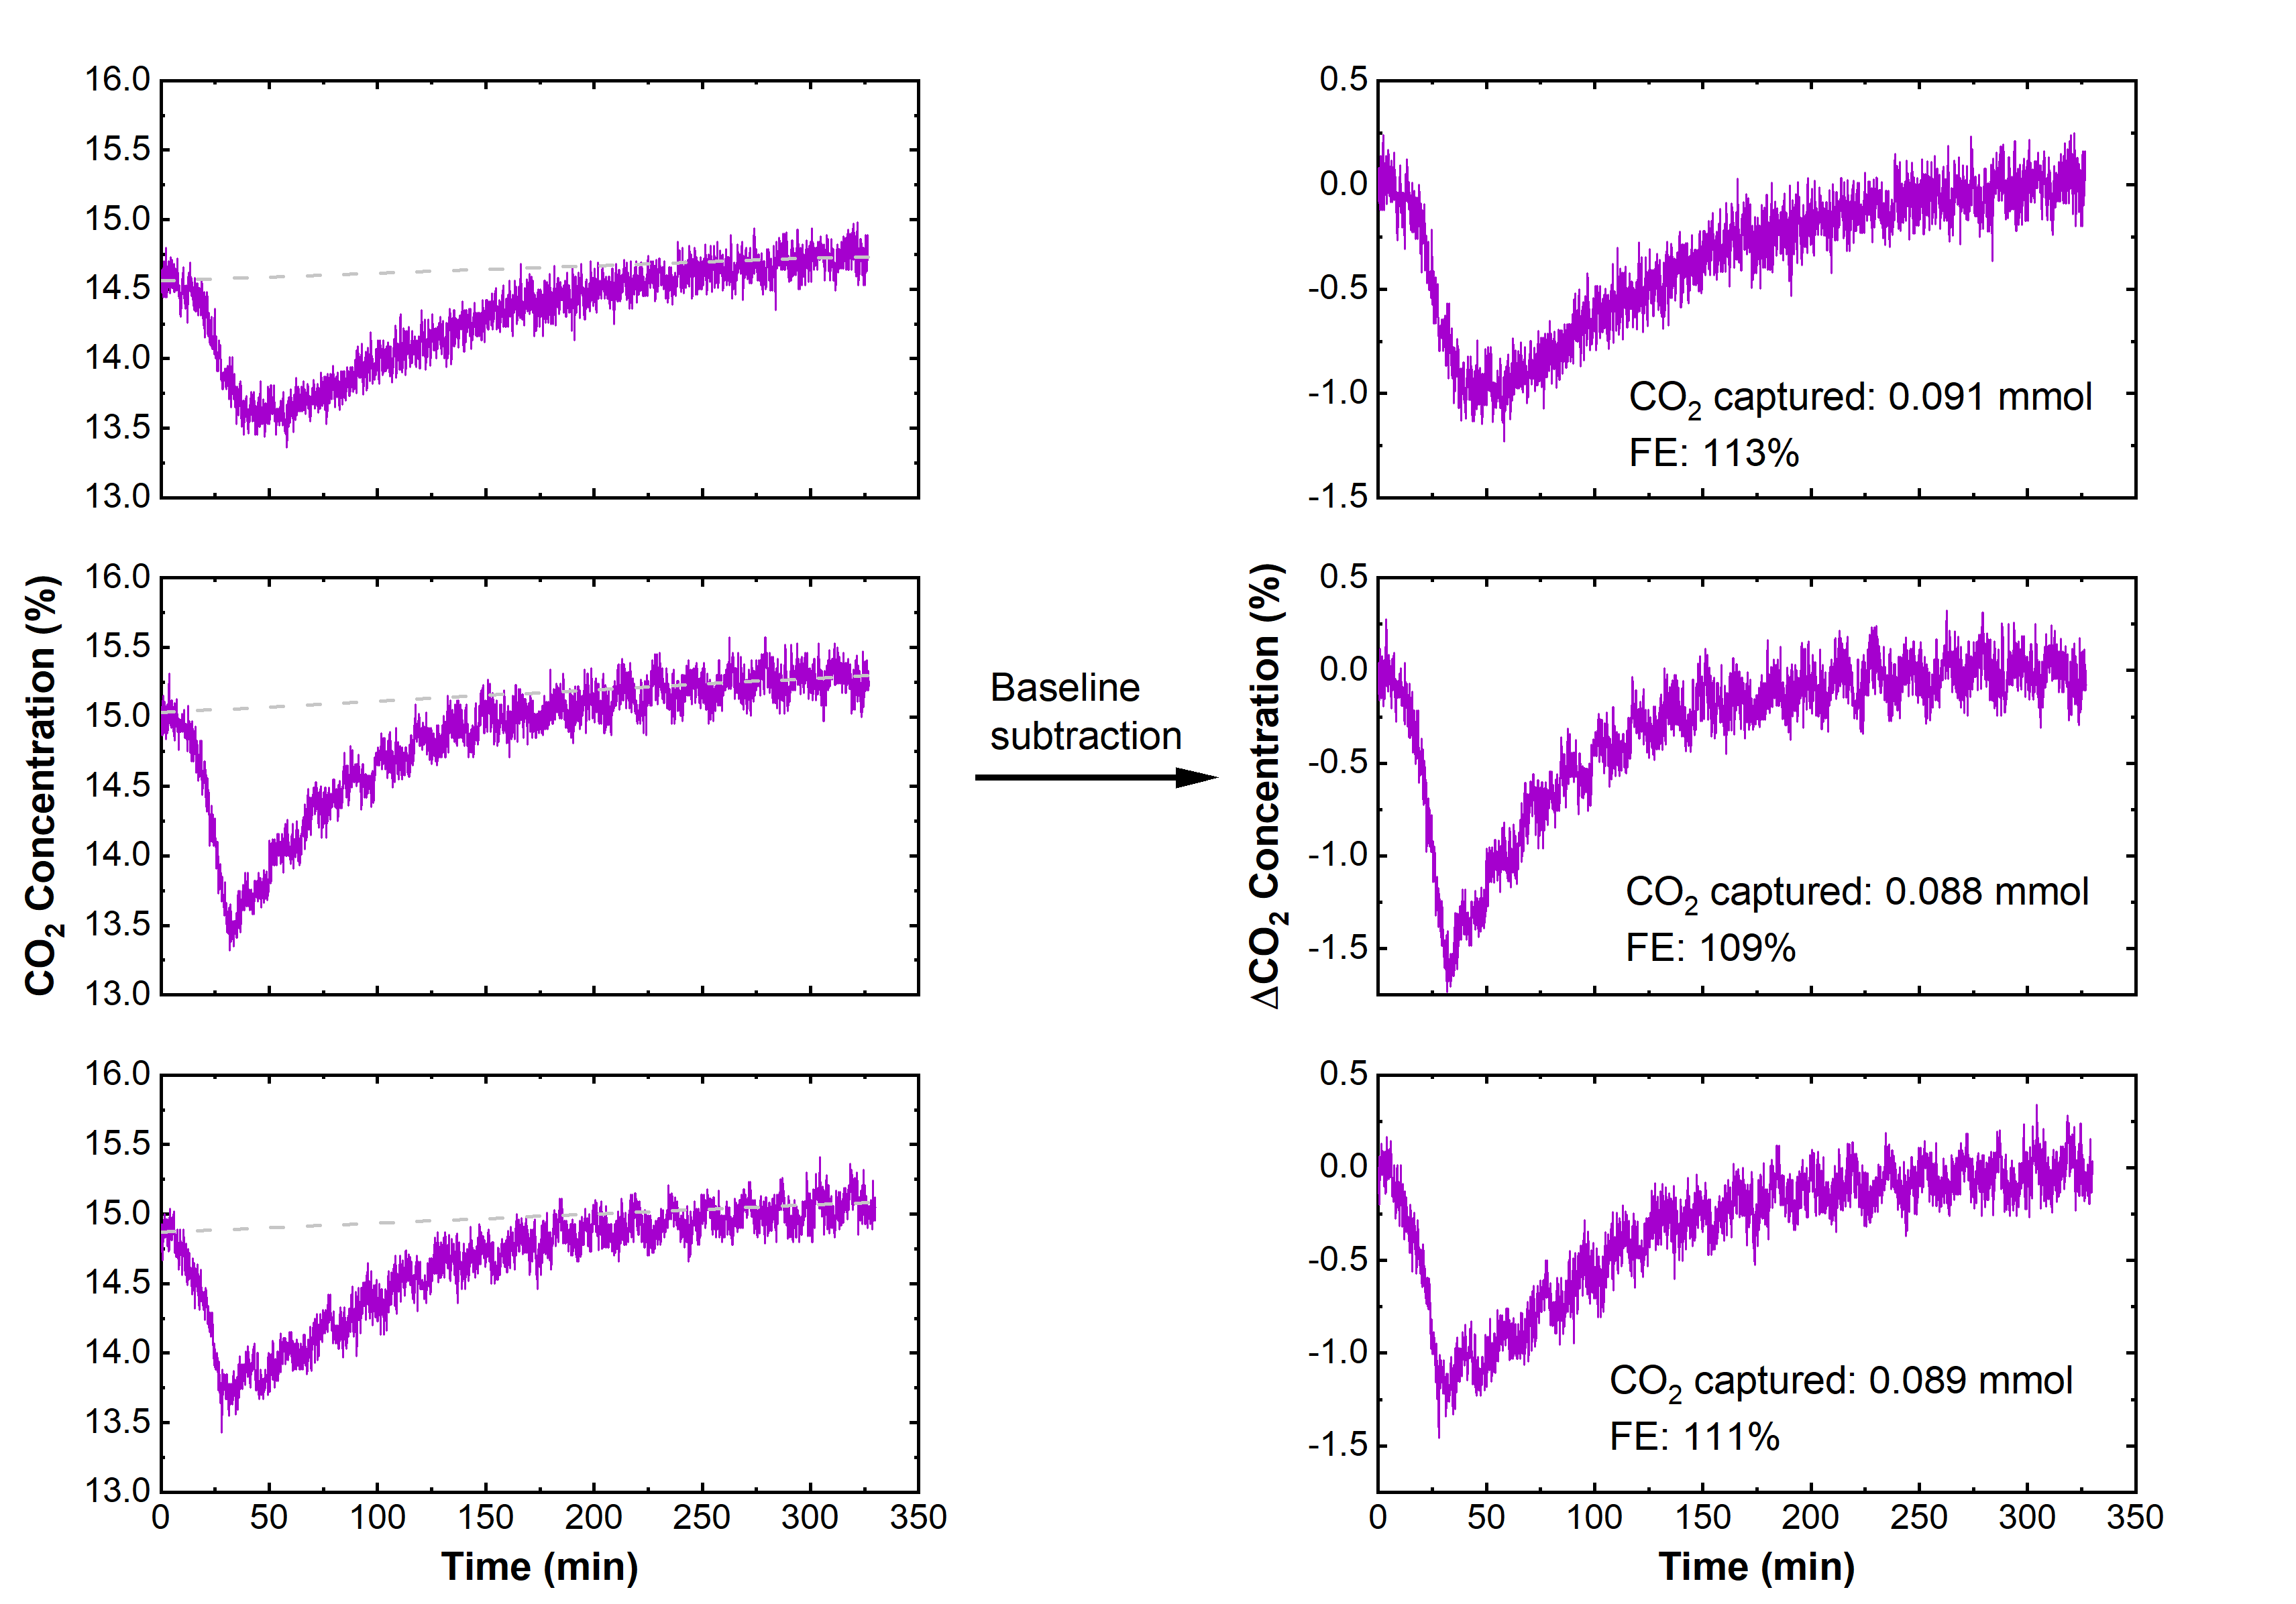
**

**Supplementary Fig. 56.** CO2 concentration change during the SOC swing of 50% to 30% for 4 mL of 0.05 M **6** under 15% CO2. The reduction is conducted at 7.5 mA for 1029 s and the system rest for 5 h for the CO2 concentration to go back to baseline.

*Theoretical Faradaic efficiency (FE) with different hypothetical oxidation/reduction pathways:*

Based on the CO₂ loading measurements (Fig. 4d in the main text), compound **6** exists as a mixture of 60% **6-CO₂** and 40% **6-2CO₂** under equilibrium conditions at 15% CO₂, representing the initial speciation at state of charge (SOC) of 0%. **Supplementary Fig. 57** illustrates the speciation changes as SOC increases, considering three possible oxidation pathways: preferential oxidation of **6-CO₂** first (**Supplementary Fig. 57a**), preferential oxidation of **6-2CO₂** first (**Supplementary Fig. 57b**), and no preferential oxidation order (**Supplementary Fig. 57c**). In each scenario, the corresponding Faradaic efficiency (FE) is indicated for specific SOC ranges, as labeled in the respective figures.

**
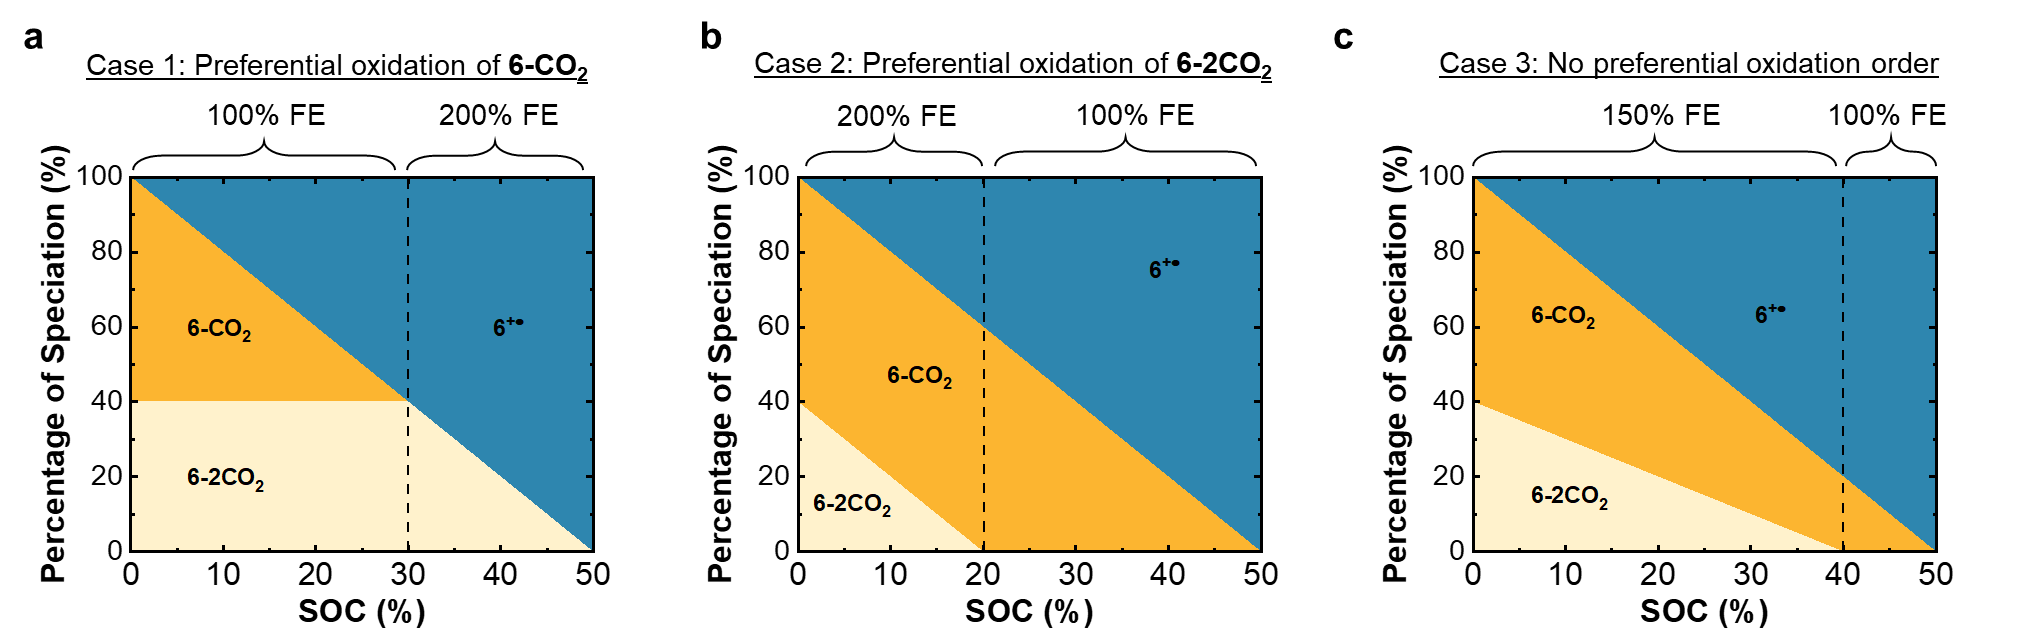
**

**Supplementary Fig. 57**. Speciation changes at various SOCs and the corresponding FEs under the assumptions of **a.** preferential oxidation of **6-CO2** (**6-2CO2** is not oxidized until **6-CO2** is depleted); **b.** preferential oxidation of **6-2CO2** (**6-CO2** is not oxidized until **6-2CO2** is depleted); **c.** no preferential oxidation order, such that **6-CO2** and **6-2CO2** are depleted at equivalent rates.

The theoretical average FE (FEavg) was calculated for the three test cases in the main text (Fig. 5b) based on the proportion of the SOC (unitless fraction between 0 and 0.5) swing in each FE range. Using Case 1 and 25% to 40% SOC swing as an example:

(S4)

The combinations of FEavg for all three scenarios and three test cases are tabulated in **Supplementary Table S2**.

**Supplementary Table. 2.** FEavg for three SOC swing cases (10% ↔ 25%, 25% ↔ 40%, and 30% ↔ 50%) under three potential oxidation scenarios.

| SOC swing | 10% ↔ 25% | 25% ↔ 40% | 30% ↔ 50% |
| --- | --- | --- | --- |
| Case 1 | 100 | 167 | 200 |
| Case 2 | 167 | 100 | 100 |
| Case 3 | 150 | 150 | 125 |

**
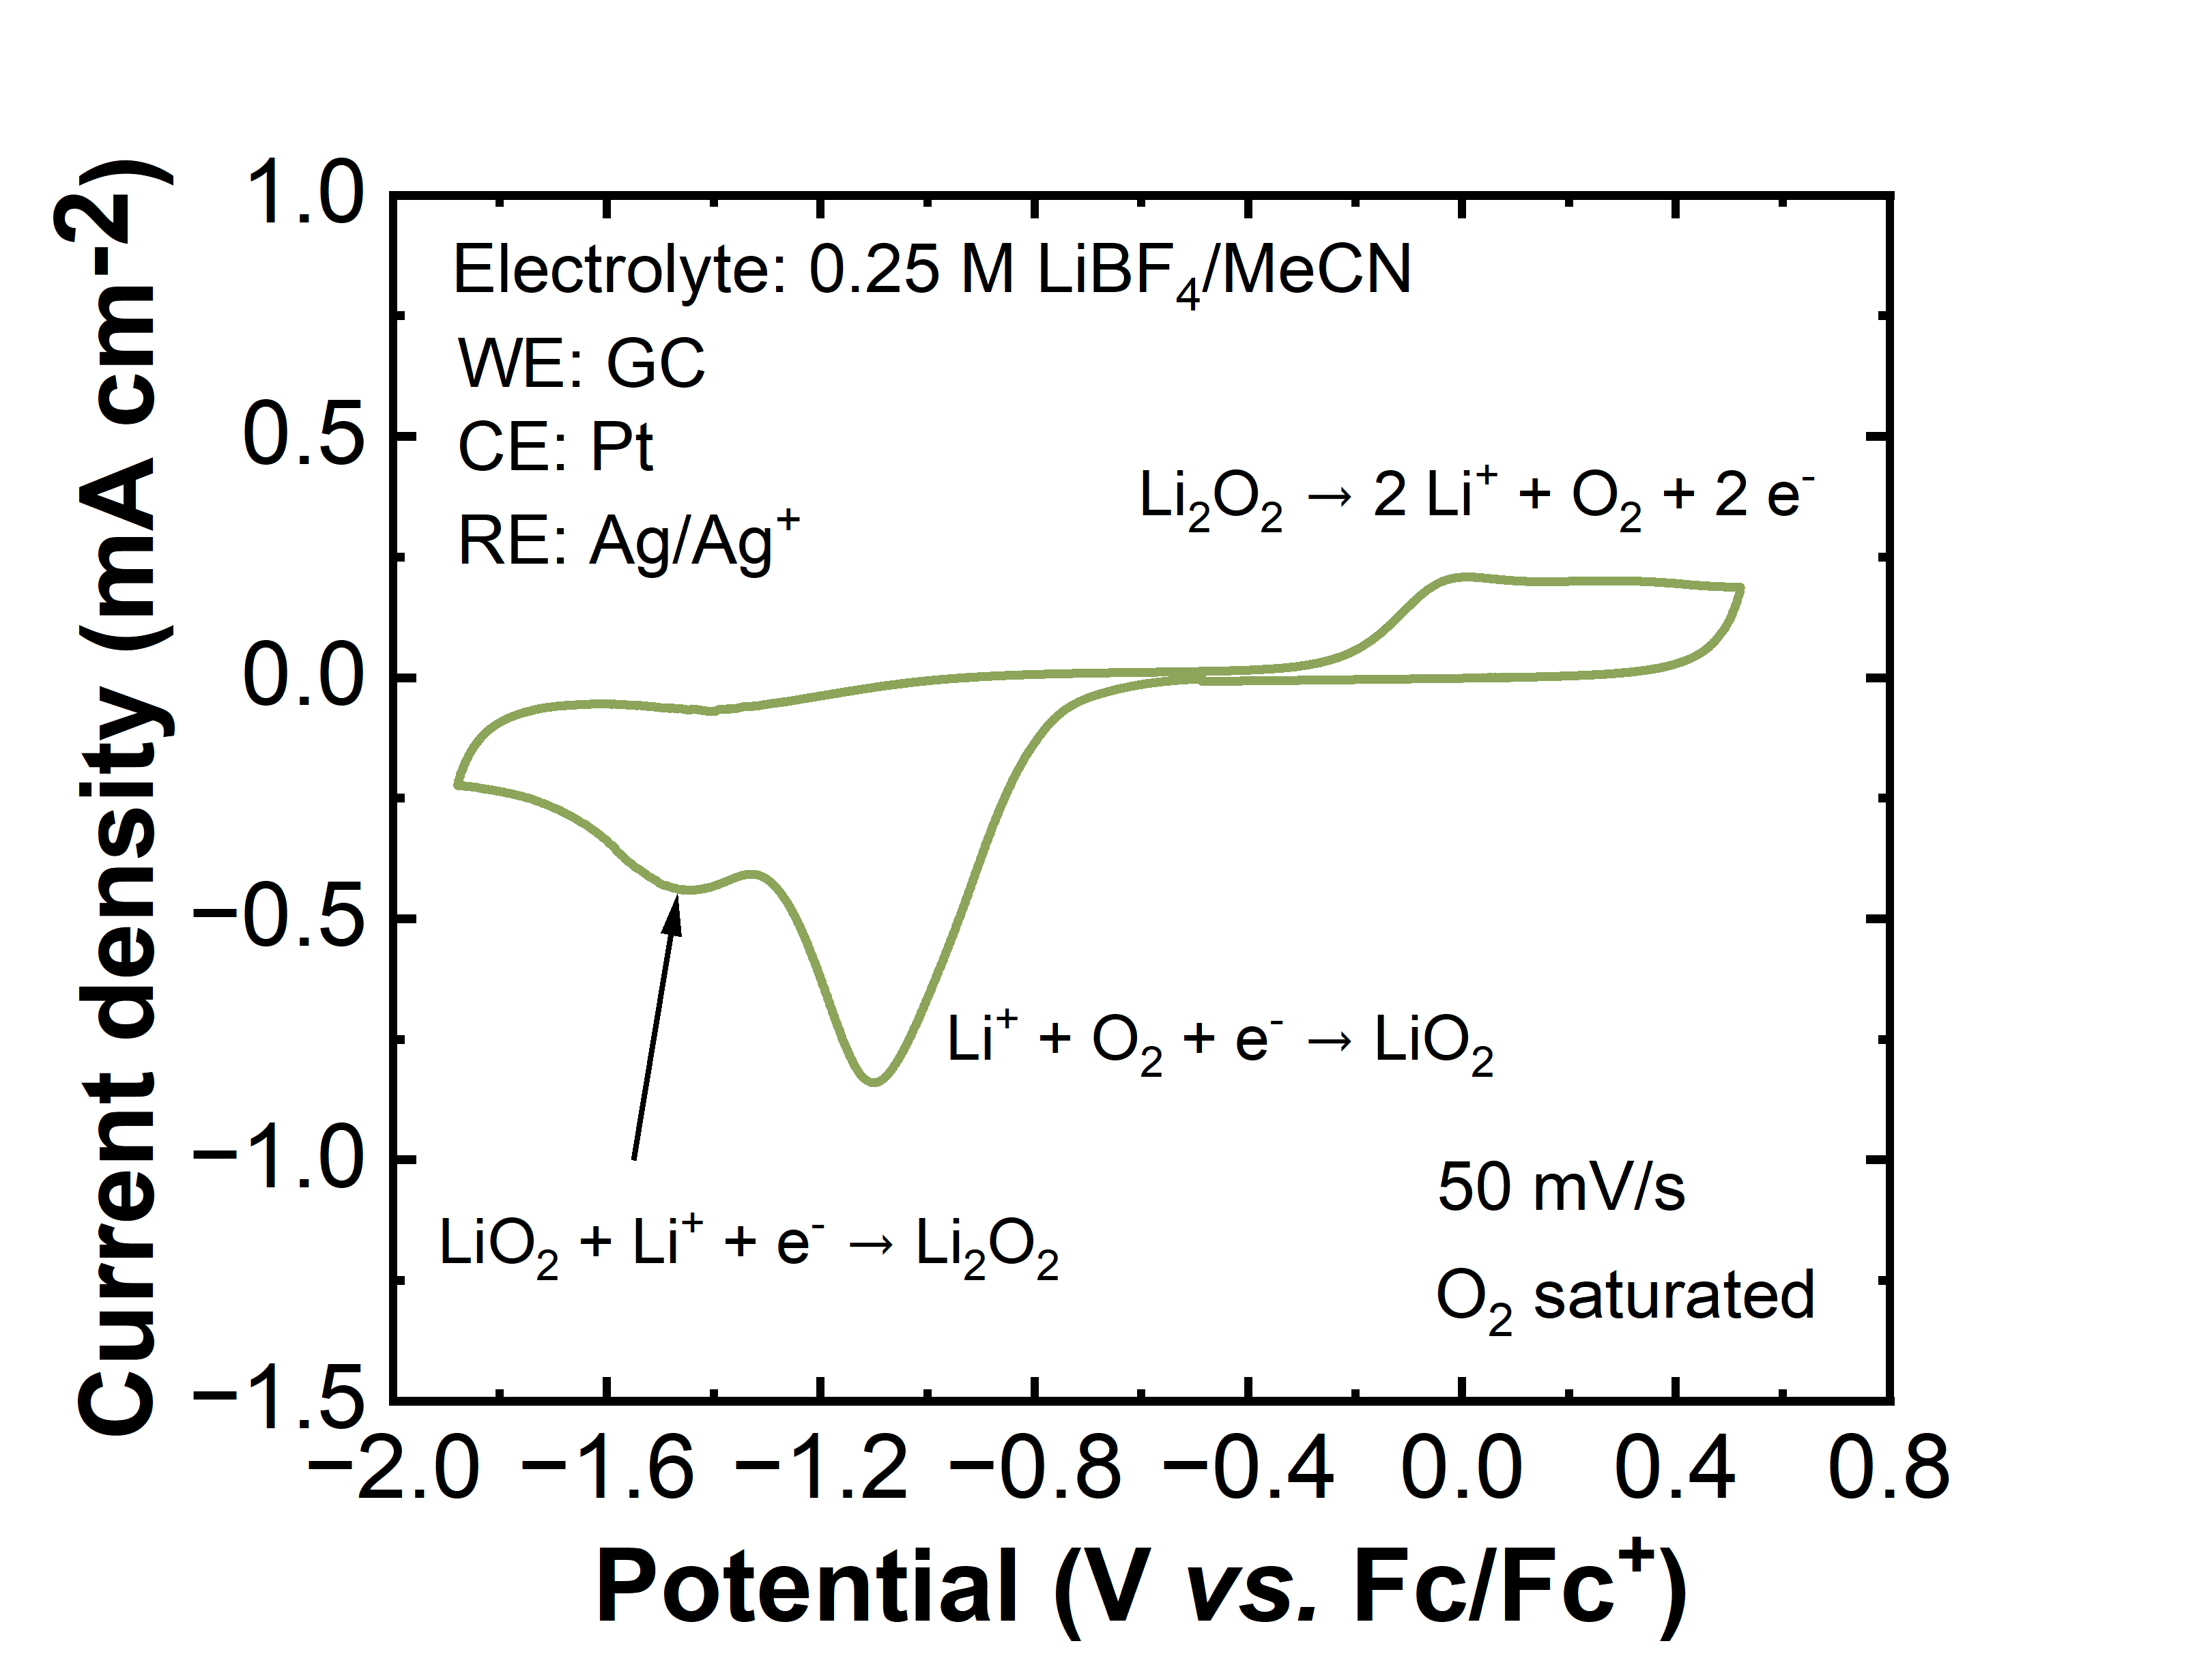
**

**Supplementary Fig. 58.** Cyclic voltammetry of O2-saturated 0.25 M LiBF4/MeCN electrolyte at 50 mV/s. The scan starts at OCV (-0.50 V *vs.* Fc/Fc+) and first scans negatively. Working electrode: glassy carbon (GC), counter electrode: Pt, and reference electrode: Ag/Ag+.

*Decay of* ***6+•*** *at high concentrations over time:*

The intrinsic stability of **6+•** stored under Ar was examinedat elevated concentration (0.05 M). The 0.05 M **6+•**electrolyte was prepared by electro-oxidation in the H-cell using 0.03 M zinc bis(trifluoromethylsulfonyl)imide (Zn(TFSI)2, Solvionic) in 0.25 M LiBF4/MeCN as the electrolyte in the counter electrode chamber. The appearance of the 0.05 M **6+•**electrolyte before and following a 1:500 dilution ratio in 0.25 M LiBF4/MeCN were shown in **Supplementary Fig. 59a**. The freshly prepared electrolyte was diluted to different concentrations and their UV-Vis absorbances at 620 nm were then used to build the calibration curve to determine the corresponding pre-diluted concentration, as shown in **Supplementary Fig. 59b**.


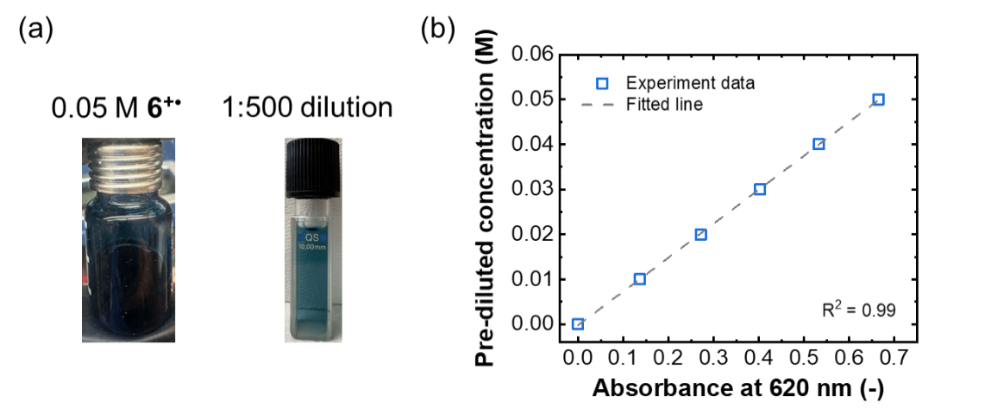


**Supplementary Fig. 59**. **a.** Photographs of vials containing 0.05 M **6+•** before (left) and after (right) 1:500 dilution in 0.25 M LiBF4/MeCN. **b.** UV-Vis calibration curve for determining the **6+•** pre-dilution concentration using the absorbance peak at 620 nm.

The 0.05 M **6+•** electrolytewas stored in the Ar glovebox and taken fordilution right before each UV-Vis measurement at different resting time. **Supplementary Fig. 60a** showed the UV-Vis absorbances from 200 to 800 nm at various times, and it was observed that the characteristics peaks at 370 nm and 620 nm for **6+•** decay overtime, which is quantified in **Supplementary Fig. 60b**. The result show that after 24 h, the majority of **6+•** (>80%) was degraded and the emergence of the peak at 275 nm demonstrated a new species formed after the degradation, which will require further study to elucidate.


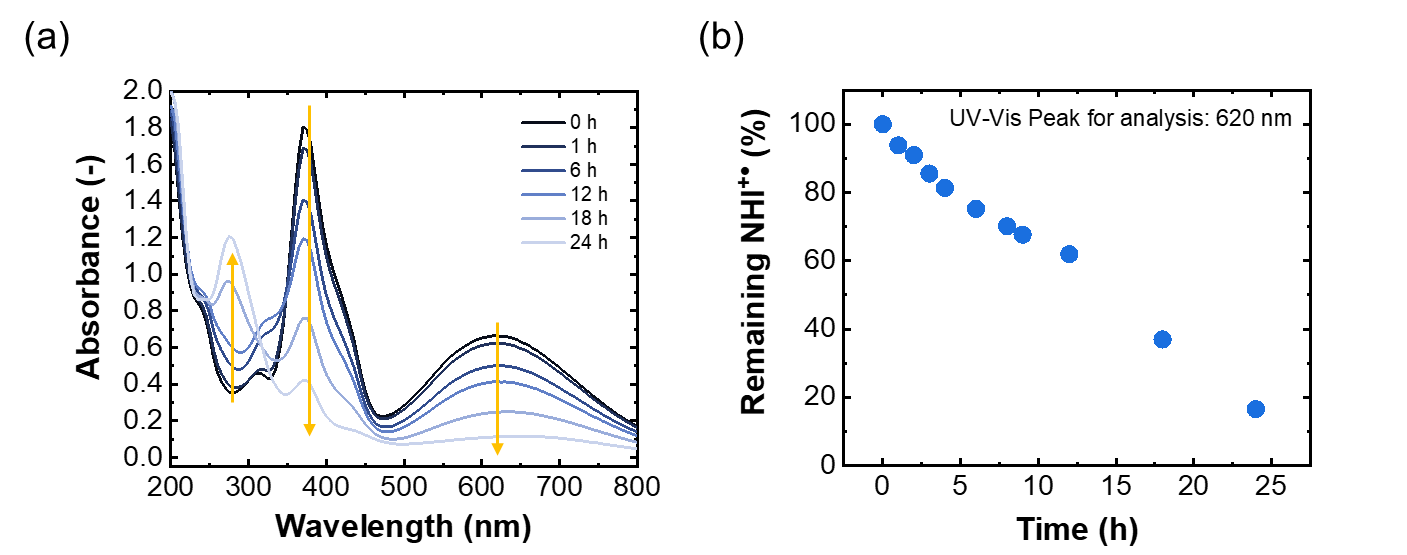


**Supplementary Fig. 60**. **a.** UV-VIS spectra of 0.05 M **6+•** at various resting times. **b.** Percentage of remaining **6+•**over time.

**Supplementary Table 3.** **Summary of selected EMCC processes**

| Material | Reduction peak potential  (V *vs.* Fc/Fc+) | Theoretical work a  (kJ/mol CO2) | Current (mA) | Loading swing | Cycle condition | Cycle | CO2 capacity utilization b | Coulombic efficiency c | Release/  capture efficiency | System work  (kJ/mol CO2) |
| --- | --- | --- | --- | --- | --- | --- | --- | --- | --- | --- |
| Liquid quinone  (LQ)7 | -0.9 | 35 | 10 | 2.4% | 15% CO2 | 10 | 60-70% | 80-90% | 100% | 35-220 d |
| 15% CO2  5% O2 | 6 | 40% | 80-90% | 90% |
| sp2-nitrogen  *AzPy8* | -1.2 | 16 | 10 | 18.7% | 20% CO2 | 20 | 100% | 90% | 100% | 120 |
| 18.5% CO2  3% O2 | 14 | 100% | 87% | 97% | 156 |
| Isoindigos9 | -1.2 | 16 | 10 | 18.7% | 10% CO2 | 19 | 65% | 84% | 97% | 143 |
| 10% CO2  3% O2 | 16 | 50% | 85% | 100% | 171 |
| BDT-quinone10 | -1.4 | 8 | 10 | 80% | 13% CO2 | 20 | 80% | - | - | 108 |
| This work | -0.6 | 13 | 7.5 | 20% | 15% CO2 | 40 | 150% | 100%e | 100% | ~10f |
| 13% CO2 3% O2 | 40 | - |

1. Theoretical work was estimated by the separation of oxidation and reduction onset potentials under CO2 in reported cyclic voltammetry. Onset potential was determined by the potential of which the current achieved 10% of the peak current.
2. CO2 capacity utilization efficiency is defined as the amount of CO2 captured relative to the theoretical value under the assumption of one CO2 molecule per electron. This is the same definition as Faradaic efficiency in the main text.
3. Coulombic efficiency is defined as the electrochemical sorbent oxidation capacity relative to the reduction capacity.
4. The reported system work is distinct from their cycling cell setup.
5. Cell cycled between 15-35% SOC as shown in Fig. 5d.
6. System work is projected using a three-electrode cell setup.

# Supplementary References

1 Kunetskiy, R. A. *et al.* A New Class of Organosuperbases, N‐Alkyl‐and N‐Aryl‐1, 3‐dialkyl‐4, 5‐dimethylimidazol‐2‐ylidene Amines: Synthesis, Structure, pKBH+ Measurements, and Properties. *Chemistry–A European Journal* **18**, 3621-3630 (2012).

2 Wilm, L. F. *et al.* Reversible CO 2 fixation by N-heterocyclic imines forming water-stable zwitterionic nitrogen-base–CO 2 adducts. *Green Chemistry* **21**, 640-648 (2019).

3 McSkimming, A. & Suess, D. L. Selective synthesis of site-differentiated Fe4S4 and Fe6S6 clusters. *Inorganic Chemistry* **57**, 14904-14912 (2018).

4 Mazzotta, F., Zitzer, G., Speiser, B. & Kunz, D. Electron‐Deficient Imidazolium Substituted Cp Ligands and their Ru Complexes. *Chemistry–A European Journal* **26**, 16291-16305 (2020).

5 Jitaru, M. Electrochemical carbon dioxide reduction-fundamental and applied topics. *Journal of the University of chemical Technology and Metallurgy* **42**, 333-344 (2007).

6 Fang, X. *et al.* Kinetic Control over Disproportionation Stabilizes Wurster’s Blue Catholyte for Nonaqueous Redox Flow Batteries. *ACS Energy Letters* **9**, 5737-5743 (2024).

7 Diederichsen, K. M., Liu, Y. Y., Ozbek, N., Seo, H. & Hatton, T. A. Toward solvent-free continuous-flow electrochemically mediated carbon capture with high-concentration liquid quinone chemistry. *Joule* **6**, 221-239 (2022).

8 Li, X., Zhao, X. H., Liu, Y. Y., Hatton, T. A. & Liu, Y. Y. Redox-tunable Lewis bases for electrochemical carbon dioxide capture. *Nature Energy* **7**, 1065-107 (2022).

9 Li, X. *et al.* Redox-tunable isoindigos for electrochemically mediated carbon capture. *Nat Commun* **15**, 117 (2024).

10 Abdinejad, M., Massen‐Hane, M., Seo, H. & Hatton, T. A. Oxygen‐Stable Electrochemical CO2 Capture using Redox‐Active Heterocyclic Benzodithiophene Quinone. *Angewandte Chemie International Edition*, e202412229 (2024).
